1  
2  
3  
4  
5  
6  
7  
8  
9  
10  
11  
12  
13  
14  
15  
16  
17  
18  
19  
20  
21  
22  
23  
24  
25

# **A Concerted Mechanism Involving ACAT and SREBPs**

## **By which Oxysterols Deplete Accessible Cholesterol**

### **To Restrict Microbial Infection**

**David B. Heisler<sup>1,3</sup>, Kristen A. Johnson<sup>2,3,4</sup>,**  
**Maikke B. Ohlson<sup>1</sup>, Duo Ma<sup>1,2</sup>, Lishu Zhang<sup>1</sup>, Michelle Tran<sup>2</sup>, Chase D. Corley<sup>2</sup>,**  
**Michael E. Abrams<sup>1</sup>, Jeffrey G. McDonald<sup>2</sup>, John W. Schoggins<sup>1</sup>,**  
**Neal M. Alto<sup>1,\*</sup>, and Arun Radhakrishnan<sup>2,5,\*</sup>**

<sup>1</sup> Department of Microbiology, The University of Texas Southwestern Medical Center, Dallas, TX 75390, USA

<sup>2</sup> Department of Molecular Genetics, The University of Texas Southwestern Medical Center, Dallas, TX 75390, USA

<sup>3</sup> These authors contributed equally to this manuscript.

<sup>4</sup> Current affiliation: Fred Hutchinson Cancer Center, Clinical Research Division, Seattle WA.

<sup>5</sup> Lead Contact

\* Corresponding Authors:

neal.alto@utsouthwestern.edu and arun.radhakrishnan@utsouthwestern.edu

26 **Abstract**

27 Most of the cholesterol in the plasma membranes (PMs) of animal cells is sequestered  
28 through interactions with phospholipids and transmembrane domains of proteins.  
29 However, as cholesterol concentration rises above the PM's sequestration capacity, a  
30 new pool of cholesterol, called accessible cholesterol, emerges. The transport of  
31 accessible cholesterol between the PM and the endoplasmic reticulum (ER) is critical to  
32 maintain cholesterol homeostasis. This pathway has also been implicated in the  
33 suppression of both bacterial and viral pathogens by immunomodulatory oxysterols.  
34 Here, we describe a mechanism of depletion of accessible cholesterol from PMs by the  
35 oxysterol 25-hydroxycholesterol (25HC). We show that 25HC-mediated activation of acyl  
36 coenzyme A: cholesterol acyltransferase (ACAT) in the ER creates an imbalance in the  
37 equilibrium distribution of accessible cholesterol between the ER and PM. This imbalance  
38 triggers the rapid internalization of accessible cholesterol from the PM, which is sustained  
39 for long periods of time through 25HC-mediated suppression of SREBPs. In support of  
40 a physiological role for this mechanism, 25HC failed to suppress Zika virus and human  
41 coronavirus infection in ACAT-deficient cells, and *Listeria monocytogenes* infection in  
42 ACAT-deficient cells and mice. We propose that selective depletion of accessible PM  
43 cholesterol triggered by ACAT activation and sustained through SREBP suppression  
44 underpins the immunological activities of 25HC and a functionally related class of  
45 oxysterols.

46

## 47 **Introduction**

48 Cholesterol is an essential component of the membranes of animal cells and its levels are  
49 tightly regulated by multiple feedback mechanisms that control its production, uptake, and  
50 intracellular distribution (1, 2). Dysregulation of cellular cholesterol homeostasis is implicated in  
51 many human diseases ranging from atherosclerosis to cancer (3, 4). There is also growing  
52 evidence that membrane cholesterol modulation plays key roles in host defense against bacterial  
53 and viral pathogens (5-8). While the proteins and pathways that mediate cholesterol regulation  
54 have been extensively studied, how these processes are rapidly altered during infection remains  
55 poorly defined.

56 Most of a mammalian cell's cholesterol is concentrated in the plasma membrane (PM),  
57 where the molecule makes up 40 – 50% of the total lipids (9). The steady state levels of PM  
58 cholesterol are regulated by balancing the flow of cholesterol into and out of the PM. Inflows to  
59 the PM originate from two locations – i) the endoplasmic reticulum (ER) where cholesterol is  
60 synthesized; and ii) lysosomes where cholesterol is liberated from low-density lipoproteins (LDL)  
61 that bind to LDL receptors on the PM and are internalized by receptor-mediated endocytosis (10).  
62 Upon arrival at the PM from these locations, the incoming cholesterol forms complexes with  
63 sphingomyelin (SM) and other PM phospholipids, which imparts the PM with structural properties  
64 required for proper cellular function and growth (11, 12). Cholesterol in excess of the sequestering  
65 capacity of PM phospholipids forms a pool that has been termed “accessible cholesterol” (13).  
66 Expansion of this pool signals cholesterol overaccumulation and triggers flow of accessible  
67 cholesterol out of the cell by PM cholesterol efflux proteins (14, 15), or into the cell by cholesterol  
68 transporters that move the lipid to organelles such as the ER (16, 17).

69 The accessible cholesterol that is transported to the ER interacts with two regulatory  
70 membrane proteins, a cholesterol sensor called Scap (18, 19) and a cholesterol-modifying  
71 enzyme called acyl coenzyme A: cholesterol acyltransferase (ACAT) (20, 21). Binding of  
72 cholesterol to Scap prevents the activation of sterol regulatory element-binding proteins  
73 (SREBPs), transcription factors that upregulate genes for lipid production, including those for  
74 cholesterol synthesis and uptake (1). The ACAT enzyme converts some of the incoming  
75 cholesterol to cholesteryl esters for storage in cytoplasmic lipid droplets (22). Thus, the  
76 transcriptional and enzymatic responses induced by accessible cholesterol arriving at the ER  
77 combine to reduce cellular cholesterol and protect the PM from cholesterol overaccumulation.

78           While accessible cholesterol in the PM plays a crucial role in maintaining cholesterol  
79 homeostasis and regulating cell growth, this pool of cholesterol can also be a vulnerability as it is  
80 exploited by numerous bacteria and viruses to promote infection (6-8). Fortunately, animal cells  
81 have devised a clever solution to rectify this vulnerability. The solution involves an innate immune  
82 response that stimulates the expression of cholesterol 25-hydroxylase (CH25H), an enzyme that  
83 attaches a hydroxyl group to the iso-octyl sidechain of cholesterol to generate 25-  
84 hydroxycholesterol (25HC), a potent signaling molecule (23). 25HC produced by macrophage  
85 cells in response to infection acts in a paracrine manner to induce rapid depletion of accessible  
86 cholesterol, but not cholesterol in complexes with SM, from the PMs of nearby cells. Such  
87 depletion prevents the spread of infection by bacterial pathogens such as *Listeria monocytogenes*  
88 and *Shigella flexneri* (6) as well as cellular infection by viruses such as SARS-CoV-2, the  
89 causative agent of COVID-19 (8). In addition, 25HC acts in an autocrine manner to prevent  
90 macrophage lysis by bacterial pore-forming toxins that target accessible cholesterol in  
91 membranes (7).

92           Establishing the mechanisms of how 25HC rapidly depletes accessible cholesterol from  
93 PMs has been complicated due to this oxysterol's actions on multiple cholesterol homeostatic  
94 pathways, including *i*) binding to Insigs, which suppresses the activation of SREBPs and reduces  
95 cholesterol synthesis and uptake (24); *ii*) activating Liver X receptors (LXRs), transcription factors  
96 that upregulate genes encoding proteins involved in cholesterol efflux (14, 25); and *iii*) stimulating  
97 the activity of ACAT, which esterifies cholesterol (22, 26). Each of these actions would lower  
98 levels of total cellular cholesterol, which would then be expected to lower accessible cholesterol  
99 in PMs. The recent studies on 25HC's role in restricting pathogen infection (6-8) have pointed to  
100 the involvement of two of these pathways - ACAT and SREBP - in depleting accessible cholesterol  
101 from PMs, however several questions remain unanswered. First, what is the primary target of  
102 25HC that initiates depletion of accessible cholesterol from the PM? Second, what is the  
103 underlying mechanism by which 25HC depletes PMs of accessible cholesterol? Third, how does  
104 25HC sustain low levels of accessible PM cholesterol over long time periods necessary to disrupt  
105 the lifecycles of pathogens *in vivo*? Finally, does 25HC inhibit both bacterial and viral infections  
106 through a common mechanism?

107           Here, using a panel of oxysterols with diverse structures and cell lines deficient in key  
108 components that regulate cholesterol homeostasis, we find that rapid depletion of accessible  
109 cholesterol from PMs by 25HC is solely determined by ACAT activity. Stimulation of ACAT by  
110 25HC siphons off cholesterol that arrives at the ER for conversion to cholesteryl esters, forcing a



111 redistribution of cellular cholesterol, which ultimately leads to a decrease in accessible PM  
112 cholesterol. Once initiated through ACAT, the depletion of accessible PM cholesterol persists for  
113 longer periods through 25HC's inhibition of transcriptional pathways responsible for cholesterol  
114 synthesis and uptake. In the absence of ACAT, 25HC no longer protects cells from lysis by  
115 cytolytins secreted by *Clostridium perfringens* and *Bacillus anthracis*, infection by *Listeria*  
116 *monocytogenes*, or infection by Zika virus and coronaviruses. Moreover, in an ACAT-deficient  
117 animal model, 25HC-mediated protection of the spleen and liver from infection by *Listeria*  
118 *monocytogenes* is reduced. Together, these studies unite the disparate reports of anti-bacterial  
119 and anti-viral properties of 25HC through a common mechanism orchestrated by ACAT.

## 120 **Results**

### 121 ***Side-chain oxysterols like 25HC trigger rapid depletion of accessible cholesterol from PMs***

122 To carry out a detailed examination of the effects of 25HC on PM cholesterol, we chose  
123 Chinese hamster ovary (CHO) cells as a model cellular system since these cells have been used  
124 for more than two decades to study cholesterol regulatory pathways (22, 27). To detect  
125 accessible cholesterol in PMs of live cells, we used domain 4 of anthrolysin O (ALOD4), a non-  
126 lytic protein sensor that specifically detects this pool of cholesterol in membranes (**Figure S1A**)  
127 (17, 28). When a line of CHO cells designated CHO-K1 were grown in cholesterol-rich fetal calf  
128 serum (FCS), their PMs contained high levels of accessible cholesterol that were readily detected  
129 by ALOD4 (**Figures 1A & 1B, lane 1 of top panels**). When these cells were incubated with 25HC  
130 for increasing times, ALOD4 binding declined sharply after 1 hour and was eliminated after 4  
131 hours (**Figure 1A, top panel**). When treated with increasing concentrations of 25HC, ALOD4  
132 binding was sharply reduced after treatment with 1  $\mu$ M 25HC and eliminated when 25HC  
133 exceeded 2.5  $\mu$ M (**Figure 1B, top panel**). Thus, treatment of CHO-K1 cells with 25HC rapidly  
134 depleted accessible cholesterol from PMs in a dose-dependent manner, as observed previously  
135 in other cell types (6, 7).

136 We next asked whether 25HC was unique among oxysterols in triggering such rapid  
137 depletion of accessible PM cholesterol. To address this question, we assayed a panel of  
138 structurally diverse oxysterols (**Figure 1C**) harboring hydroxyl groups on the steroid nucleus (A –  
139 C) or the iso-octyl side-chain (D – J), as well as an oxysterol where the 3 $\beta$ -hydroxyl was replaced  
140 with a sulfate group (K). As shown in **Figure 1D**, ALOD4 binding to the PMs of CHO-K1 cells  
141 was markedly reduced by treatment for 4 hours with 25HC (I), as well as oxysterols harboring  
142 hydroxyl groups at carbons 20 (D) or 27 (J). Oxysterols with hydroxyl groups at carbon 24 (G, H)  
143 partially reduced ALOD4 binding, whereas oxysterols with hydroxyl groups on carbon 22 (E, F)

144 had no effect. These data indicate that the location of the hydroxyl modification on the sterol side-  
145 chain plays a crucial role in controlling accessible PM cholesterol. Moreover, the ability of a side-  
146 chain oxysterol like 25HC (*I*) to reduce ALOD4 binding required the 3 $\beta$ -hydroxyl group since  
147 replacement of this group with a sulfate group (*K*) abolished this effect. No reduction of ALOD4  
148 binding was detected with oxysterols bearing hydroxyl groups on the steroid nucleus at carbons  
149 4 (*A*), 7 (*B*), or 19 (*C*). While oxysterols *D*, *G*, *H*, *I*, and *J* reduced ALOD4 binding in an all-or-  
150 none fashion, they had no detectable effect on the binding of Ostreolysin A (OlyA) (**Figure 1E**), a  
151 sensor for the SM-sequestered pool of PM cholesterol (**Figure S1A**) (29, 30). In line with the  
152 immunoblot analysis in **Figures 1D & E**, microscopy imaging with fluorescent versions of ALOD4  
153 (fALOD4-Neon) and OlyA (fOlyA-647) also showed that oxysterols *D*, *G*, *H*, *I*, and *J* eliminated  
154 accessible cholesterol, but not SM-sequestered cholesterol, from the PMs of CHO-K1 cells  
155 (**Figure S1B**).

156 We followed up with dose curve analysis of the effect of each oxysterol on ALOD4 binding.  
157 At the highest concentrations tested, oxysterols *D*, *G*, *H*, *I*, and *J* reduced ALOD4 binding by more  
158 than 65%, whereas treatment with oxysterols *A*, *B*, *C*, *E*, *F*, or *K* showed no such reduction (**Figure**  
159 **S1C**). Detailed time course analyses for the five oxysterols that markedly reduced ALOD4 binding  
160 (*D*, *G*, *H*, *I*, and *J*) showed that oxysterols *D*, *I*, and *J* reduced binding by more than 50% within 1  
161 hour, whereas oxysterols *G* and *H* required 4 hours for a similar reduction (**Figure S1D**).  
162 Together, these data indicate that selective depletion of accessible PM cholesterol within 4 hours  
163 is triggered by oxysterols harboring hydroxyl groups on the iso-octyl side chain at carbons 20, 24,  
164 25, or 27.

165 To support our interpretation that the reduction of ALOD4 binding by certain oxysterols  
166 indicated depletion of accessible PM cholesterol, we carried out flow cytometry analysis of  
167 fALOD4-Neon binding to rabbit red blood cells (RBCs), which have an outer limiting membrane  
168 with high levels of accessible cholesterol but no internal membranes or mechanisms to  
169 synthesize, modify, or internalize cholesterol (31). As shown in **Figures S2A** and **S2B**, We  
170 observed no reduction in fALOD4-Neon binding to RBCs that were treated for 4 hours with the  
171 panel of oxysterols (**Figure 1C**), whereas binding was abolished by treatment with hydroxypropyl  
172  $\beta$ -cyclodextrin (HPCD), a reagent that extracts cholesterol from membranes (32). These results  
173 suggest that reduction of ALOD4 binding to the PMs of CHO-K1 cells by oxysterols *D*, *G*, *H*, *I*,  
174 and *J* is not due to effects on the lipid bilayer or on ALOD4, but rather due to their effects on  
175 cholesterol homeostatic pathways.

176

177 **Stimulation of ACAT activity triggers rapid depletion of accessible cholesterol from PMs**

178 Oxysterols lower cellular cholesterol by targeting multiple cholesterol homeostatic  
179 systems, including ACAT, SREBPs, and LXRs. Having established which oxysterols rapidly  
180 deplete accessible PM cholesterol (**Figure 1D**), we sought to determine if one or more of these  
181 cholesterol homeostatic systems are regulated by the same oxysterols. We first tested the  
182 oxysterol specificity for activation of ACAT's enzymatic activity using a well-established cellular  
183 assay that measures ACAT's ability to attach [<sup>14</sup>C]oleate, a radiolabeled fatty acid, to cholesterol  
184 to generate cholesteryl [<sup>14</sup>C]oleate (33). In the absence of oxysterol treatment, ACAT activity in  
185 CHO-K1 cells was low (**Figure 1F, column 1**). Oxysterols *D, G, H, I,* and *J* stimulated a more  
186 than six-fold increase in ACAT activity, whereas oxysterols *A, B, C, E, F,* and *K* did not show a  
187 similar stimulatory effect (**Figure 1F**). This specificity for activation of ACAT exactly matched that  
188 for the depletion of accessible cholesterol from PMs (**Figure 1D**).

189 We then assessed the oxysterol specificity for inactivation of SREBPs with an assay that  
190 we routinely use to monitor the status of SREBP2, one of the three isoforms of SREBP (24, 34).  
191 In this experiment, CHO-K1 cells were first depleted of cholesterol by treatment with HPCD, which  
192 triggered the conversion of SREBP2 from its inactive precursor form (*P*) to its active cleaved  
193 nuclear form (*N*) (**Figure 1G, lane 1**). When the cholesterol-depleted cells were then treated with  
194 each of the oxysterols for 4 hours, we observed that oxysterols *B, D, E, G, H, I, J,* and *K*  
195 suppressed SREBP2 cleavage whereas oxysterols *A, C,* and *F* had a reduced effect (**Figure 1G,**  
196 *lanes 2- 12*). This specificity profile did not match that for depletion of accessible cholesterol from  
197 PMs (see summary table in **Figure 1H**). In particular, oxysterols *B, E,* and *K* suppressed SREBP2  
198 cleavage but were unable to reduce ALOD4 binding (**Figure 1D**), suggesting that SREBP2  
199 suppression does not drive the rapid depletion of accessible cholesterol from PMs.

200 Lastly, we evaluated the extensive previous literature that has addressed the oxysterol  
201 specificity for activating LXR transcription factors (25, 35-39). These studies showed that  
202 oxysterols *A, B, E, G, H, I,* and *J* activate LXRs whereas oxysterols *F* and *K* had no such activating  
203 effect (see summary table in **Figure 1H**). Similar to results with SREBP2, the oxysterol specificity  
204 for LXR activation also did not match that for reduction in ALOD4 binding.

205

### 206 **Disruption of ACAT activity abolishes the ability of oxysterols to rapidly deplete accessible** 207 **cholesterol from PMs**

208 The above oxysterol specificity analysis suggested that ACAT, but not SREBPs or LXRs,  
209 triggers the rapid depletion of accessible PM cholesterol. To test this hypothesis, we generated  
210 a CHO-K1 cell line that lacks ACAT enzymatic activity. Mammalian cells contain two isoforms of  
211 ACAT, ACAT1 and ACAT2, however previous studies of CHO cells have shown that ~99% of

212 their ACAT activity arises from the ACAT1 isoform (40, 41). Therefore, we used CRISPR-Cas9  
213 genome editing to disrupt the ACAT1 gene in CHO-K1 cells (**Figure S3A**). The resulting ACAT1-  
214 deficient cells, hereafter designated as ACAT1<sup>-/-</sup> cells, had undetectable levels of ACAT1 protein  
215 (**Figure S3B**). Moreover, ACAT enzymatic activity, as judged by cholesteryl[<sup>14</sup>C]oleate formation,  
216 was stimulated by 25HC, one of the five oxysterols that triggered ACAT activity (**Figure 1F**), to  
217 an expected degree in wild-type (WT) cells but not in ACAT1<sup>-/-</sup> cells (**Figure S3D, first two groups**),  
218 further indicating that the ACAT1<sup>-/-</sup> cells lacked ACAT activity. To ensure that these results were  
219 due to loss of ACAT activity, we stably expressed either wild-type human ACAT1 or a mutant  
220 version harboring a point mutation (H460A) that abolishes ACAT1's enzymatic activity in ACAT1<sup>-/-</sup>  
221 <sup>-/-</sup> cells, and the resulting cell lines were designated as ACAT1<sup>-/-</sup>; hACAT1(WT) and ACAT1<sup>-/-</sup>;  
222 hACAT1(H460A), respectively. Compared to the ACAT1<sup>-/-</sup> cells, these two new cell lines  
223 contained high levels of ACAT1 protein (**Figure S3C**). Moreover, stimulation of ACAT enzymatic  
224 activity by 25HC was restored by the stable expression of hACAT1(WT), but not hACAT1(H460A)  
225 (**Figure S3D, last two groups**). Thus, these four cell lines provide a framework to study the  
226 specific role of ACAT activity in determining accessible cholesterol levels in PMs.

227 We then measured the effects of 25HC on accessible cholesterol in the PMs  
228 of these four cell lines. As expected, treatment of WT cells with 25HC for 4 hours depleted PM  
229 accessible cholesterol in a dose-dependent manner (**Figure 2A, lanes 1 – 6, first panel**). In  
230 contrast, no such depletion was observed in ACAT1<sup>-/-</sup> cells (**Figure 2A, lanes 1 – 6, third panel**).  
231 Restoration of ACAT activity by stable expression of hACAT1(WT) reestablished the ability of  
232 25HC to deplete accessible PM cholesterol, whereas 25HC had no effect in cells stably  
233 expressing an inactive mutant of hACAT1 (H460A) (**Figure 2A, lanes 1 – 6, fifth and seventh**  
234 **panels**). When each of these four cell lines were depleted of sterols and then treated with 25HC,  
235 we observed similar dose dependences for suppression of SREBP2 processing (**Figure S4**),  
236 indicating that 25HC entered the cells and reached their ER membranes to bind Insigs and  
237 prevent SREBP2 transport. Thus, the inability of 25HC to deplete accessible PM cholesterol in  
238 ACAT1<sup>-/-</sup> cells is not simply due to a defect in cellular entry of 25HC. In all four cell lines, 4HC did  
239 not diminish PM accessible cholesterol (**Figure 2A, lane 7, all panels**), consistent with this  
240 oxysterol's inability to stimulate ACAT activity (**Figure 1F, oxysterol A**). Similar to the results with  
241 25HC, the 4 other oxysterols that depleted accessible PM cholesterol in WT cells (**Figure 1F,**  
242 **oxysterols D, G, H, and J**) were also unable to do so in the ACAT1<sup>-/-</sup> cells, further underscoring  
243 the link between ACAT and accessible PM cholesterol (**Figure S5**).

244 We also used fluorescence microscopy to analyze the effects of 25HC on the distribution  
245 of accessible and SM-sequestered pools of cholesterol in these cell lines. Consistent with

246 immunoblot analysis (**Figure 2A**), we observed that 25HC treatment for 4 hours eliminated  
247 binding of fALOD4-Neon to WT cells, and this effect was abolished in ACAT1<sup>-/-</sup> cells (**Figure 2B**,  
248 *top two rows*). Likewise, expression of hACAT1(WT), but not hACAT1(H460A), in the ACAT1<sup>-/-</sup>  
249 cells restored 25HC's ability to deplete fALOD4-Neon binding (**Figure 2B**, *third and fourth rows*).  
250 In all four cell lines, binding of fOlyA-647 was unchanged by 25HC treatment (**Figure 2B**), further  
251 highlighting that over a period of 4 hours, 25HC specifically depletes the accessible pool of PM  
252 cholesterol in an ACAT-mediated manner.

253 To confirm that ACAT is the primary target of 25HC for rapid depletion of accessible PM  
254 cholesterol, we examined two previously described cell lines, one lacking all three isoforms of  
255 SREBPs (owing to a deficiency of Scap, which stabilizes SREBPs) (42, 43) and the other lacking  
256 both isoforms of LXRs (6). Compared to WT cells, Scap-deficient cells (that have no detectable  
257 SREBPs) and LXR-deficient cells both had lower levels of accessible cholesterol on their PMs  
258 (**Figure 2C** and **2D**, *left panels, lane 1*), and this pool of cholesterol was completely depleted by  
259 treatment with 25HC for 4 hours (*lanes 2 – 6*). Treatment with 4HC had no effect on accessible  
260 cholesterol levels in either Scap- or LXR-deficient cells (**Figure 2C** and **2D**, *left panels, lane 7*).  
261 Also, levels of SM-sequestered cholesterol in these cells were unchanged after treatment with  
262 either 25HC or 4HC (**Figure 2C** and **2D**, *right panels, lanes 1 – 7*).

263 Combined, the above sets of studies show that the rapid (1–4 hours) removal of accessible  
264 cholesterol from PMs by 25HC is due to its activation of ACAT and not due to its modulation of  
265 the SREBP or LXR pathways.

266

### 267 ***A model for rapid depletion of accessible cholesterol from PMs by ER-localized ACAT***

268 The concentration of cholesterol in the PM (~40-50 mole% of total lipids) is almost 10-  
269 fold higher than that in the ER membrane (~5 mole% of total lipids) (44-46). How then can  
270 activation of ACAT, a cholesterol-modifying enzyme in the ER membrane, rapidly alter the levels  
271 of the accessible cholesterol pool in the PM? Previous studies have suggested that even though  
272 the total cholesterol concentrations in the PM and ER are quite different, the concentration of  
273 accessible cholesterol in the two membranes may be similar (47, 48). The equivalence in  
274 accessible cholesterol levels between the PM and ER is maintained by rapid bi-directional  
275 transport of cholesterol between the two membranes (49). Based on these previous insights, we  
276 propose that ACAT activation, and the resulting production of cholesteryl esters, would siphon off  
277 some of the accessible cholesterol from the ER, thus lowering levels of accessible cholesterol in  
278 the ER relative to the PM. Cholesterol transport from the PM to the ER would then rapidly restore



279 the equivalence of accessible cholesterol between the two membranes. As a result, levels of  
280 accessible cholesterol in the PM would decline.

281 The above model provides a possible explanation for how ACAT activation by 25HC would  
282 lead to a depletion of accessible PM cholesterol in WT cells, but not in ACAT1<sup>-/-</sup> cells (**Figure 2A**).  
283 We further tested this model by activating ACAT not by 25HC but by lipoproteins, which have  
284 been shown to generate high ACAT activity (33). We then took advantage of the sensitivity of  
285 flow cytometry analysis to assess levels of accessible and SM-sequestered cholesterol in the  
286 PMs of WT and ACAT1<sup>-/-</sup> cells with fluorescent versions of ALOD4 and OlyA, respectively. When  
287 cells are grown under low cholesterol conditions (lipoprotein-deficient serum, LPDS), ACAT  
288 activity is low (33). Under these conditions, both WT and ACAT1<sup>-/-</sup> cells had the same low levels  
289 of accessible and SM-sequestered cholesterol in their PMs (**Figure 3A**). By comparison, when  
290 cells are grown under high cholesterol conditions (FCS), ACAT activity is high (33). In this case,  
291 the PMs of ACAT1<sup>-/-</sup> cells had significantly higher levels of accessible cholesterol as compared to  
292 WT cells (**Figure 3B**). This result is consistent with the model proposed above since the ACAT1<sup>-/-</sup>  
293 cells, unlike the WT cells, are unable to siphon away ER cholesterol, leading to higher levels of  
294 accessible cholesterol in the PMs of these cells. Importantly, there was no difference in levels of  
295 SM-sequestered cholesterol in the PMs of WT and ACAT1<sup>-/-</sup> cells (**Figure 3B**), highlighting the  
296 specific effect of the ACAT pathway on accessible PM cholesterol.

297 An assumption of our model is that rapid bi-directional transport of accessible cholesterol  
298 between the PM and the ER was not disrupted in ACAT1<sup>-/-</sup> cells. To test this notion, we carried  
299 out three different experiments in which the cholesterol content of the PM was varied and changes  
300 in ER cholesterol were monitored by assessing the molecular size of SREBP2, which is processed  
301 from its precursor form (*P*) to a cleaved nuclear form (*N*) in response to decreases in ER  
302 cholesterol (46). First, we depleted cholesterol from the PMs of FCS-treated cells by incubation  
303 with HPCD, which extracts cholesterol from PMs. The reduction in PM cholesterol is rapidly  
304 compensated for by drawing cholesterol from the ER, leading to a reduction in ER cholesterol  
305 levels and an increase in SREBP2 cleavage. In both WT and ACAT1<sup>-/-</sup> cells, HPCD treatment  
306 reduced ER cholesterol levels with similar time dependences (**Figure 3C**), indicating that the  
307 pathways that transport cholesterol from ER to PM are not affected in the ACAT1<sup>-/-</sup> cells.

308 Second, we depleted both cell lines of cholesterol by incubation overnight in the presence  
309 of lipoprotein-deficient serum along with compactin, an inhibitor of cholesterol synthesis (50). This  
310 treatment lowered ER cholesterol to a similar degree in both cell lines, as judged by similar levels  
311 of nuclear SREBP2 (**Figure 3D, lane 1, first and third panels**). We then added back increasing  
312 concentrations of lipoprotein-rich FCS and observed a similar dose-dependent increase in ER

313 cholesterol in both cell lines, as judged by reduction of nuclear SREBP2 (**Figure 3D**, lanes 2 – 7).  
314 Third, we depleted cells of cholesterol by treatment with HPCD and then added back increasing  
315 concentrations of complexes of cholesterol with methyl- $\beta$ -cyclodextrin (MCD), which deliver  
316 cholesterol to the PMs. Analysis of SREBP2 cleavage in both cell lines showed similar reduction  
317 in ER cholesterol levels upon depletion (**Figure 3E**, lane 1, first and third panels), and a similar  
318 dose-dependent increase in ER cholesterol levels upon replenishment with cholesterol/MCD  
319 (**Figure 3E**, lanes 2 – 6). The results of **Figures 3D** and **3E** suggest that the pathways  
320 transporting lipoprotein-derived or exogenously added cholesterol from PM to ER are not affected  
321 in the ACAT1<sup>-/-</sup> cells.

322 Taken together, the results in **Figure 3** provide a plausible mechanism for how 25HC and  
323 other ACAT-activating oxysterols could rapidly alter the levels of accessible cholesterol in the  
324 PMs of cells whose overall cholesterol content varies over a wide range.

325

### 326 **25HC-triggered depletion of accessible PM cholesterol persists long after 25HC removal** 327 **through suppression of SREBPs**

328 We next wondered whether the rapid depletion of accessible PM cholesterol after a short  
329 exposure to 25HC would be sustained over longer periods. To explore this possibility, we first  
330 treated CHO-K1 cells with 25HC for a short period of 4 hours, which depleted accessible  
331 cholesterol from the PMs in an expected manner (**Figure 4A**, first panel, lanes 1, 2). We then  
332 removed the 25HC and examined accessible PM cholesterol levels over time. Despite the lack  
333 of 25HC in the extracellular media and cells being grown in cholesterol-rich FCS, we detected no  
334 replenishment of accessible PM cholesterol even after 22 hours (**Figure 4A**, first panel, lanes 3  
335 – 8). In line with our model of equivalence of accessible cholesterol levels in the PM and ER  
336 (**Figure 3A**), we expected that ER accessible cholesterol levels would also be low 22 hours after  
337 25HC removal, which would be reflected in increased cleavage of SREBP2 to its nuclear form.  
338 Surprisingly, we detected no processing of SREBP2 (**Figure 4A**, third panel). Mass spectrometric  
339 analysis of intracellular 25HC levels (**Figure 4A**, bottom panel) showed that 25HC was barely  
340 detectable (~0.015 ng/ $\mu$ g of cellular protein) in untreated cells (lane 1) and rose to 4 ng/ $\mu$ g of  
341 cellular protein after 25HC treatment for 4 hours (lane 2). After removal of 25HC from the  
342 extracellular medium, the intracellular 25HC declined over the time course of 22 hours to 0.35  
343 ng/ $\mu$ g of cellular protein (lanes 3 – 8), a level that was 23-times higher than that in untreated cells  
344 and sufficient to suppress SREBP2 cleavage (**Figure 4A**, lane 8).

345 In contrast to the sustained action of 25HC, when accessible PM cholesterol was depleted  
346 by treatment with HPCD (1 hour), its levels were replenished within 4 hours of HPCD removal

347 (**Figure 4B**, first panel). Moreover, HPCD depletion triggered SREBP2 cleavage in an expected  
348 fashion (**Figure 4B**, second panel, lanes 1, 2), and this cleavage was suppressed at the same  
349 time as an increase in PM accessible cholesterol was detected (**Figure 4B**, second panel, lanes  
350 3 – 8). These data further support the notion that 25HC's long-term effects arise due to its  
351 suppression of SREBP cleavage. If this was the case, we would expect 25HC's effects to be  
352 overcome by expression of the cleaved nuclear forms of SREBPs. We tested this possibility in  
353 previously developed cell lines where expression of the cleaved nuclear forms of each of the three  
354 isoforms of SREBPs – SREBP1a, SREBP1c, and SREBP2 – can be induced by addition of the  
355 small molecule muristerone (51). In the absence of muristerone, these cells had detectable levels  
356 of accessible cholesterol in their PMs (**Figure 4C**, lane 1). 25HC treatment depleted this pool  
357 and no replenishment was observed 22 hours after the 25HC (**Figure 4C**, lanes 2, 3). We then  
358 treated the cells with muristerone to induce the expression of the nuclear forms of each of the  
359 three SREBPs (**Figure 4C**, lanes 4 – 6). Under these conditions, the accessible cholesterol in  
360 the PMs of these cells was also depleted by 25HC (**Figure 4C**, lanes 4, 5). However, when the  
361 25HC was removed, we now detected replenishment of accessible cholesterol on the PMs of cells  
362 expressing the nuclear forms of SREBP1a and SREBP2, but not SREBP1c (**Figure 4C**, lane 6).  
363 This isoform specificity for restoring accessible PM cholesterol is consistent with the previous  
364 observation that the nuclear forms of SREBP1a and SREBP2, but not SREBP1c, increase  
365 cholesterol synthesis and induce expression of the LDL receptor allowing for uptake of cholesterol  
366 from the LDL in FCS (51).

367 Based on these data, we hypothesized that 25HC acts through two distinct, temporally  
368 resolved stages. First, a short pulse of 25HC activates ACAT, which siphons away ER cholesterol  
369 resulting in rapid depletion of accessible cholesterol from the PM. Second, 25HC suppresses  
370 SREBP-mediated uptake and synthesis of cholesterol, resulting in sustained depletion of  
371 accessible cholesterol in the PM. We next asked whether initial ACAT activation was required for  
372 depletion of accessible cholesterol over long time periods, or whether this could be achieved  
373 simply through sustained SREBP inhibition by residual 25HC? To answer this question, we  
374 compared the responses of WT and ACAT1<sup>-/-</sup> cells to depletion of accessible PM cholesterol. As  
375 expected, HPCD treatment (1 hour) induced the depletion of accessible PM cholesterol in both  
376 cell lines (**Figure 4D**, lanes 1, 2), and this depletion was fully reversed 22 hours after HPCD  
377 removal (lane 3), indicating that this mode of cholesterol depletion occurred independently of  
378 ACAT activity. A different result was observed after 25HC treatment for 4 hours. In WT cells,  
379 25HC depleted the accessible cholesterol as expected and no replenishment was observed after  
380 the 25HC was removed (**Figure 4D**, first panel, lanes 4, 5). However, in ACAT1<sup>-/-</sup> cells, 25HC did



381 not deplete accessible PM cholesterol and there was no further change after the 25HC was  
382 removed (**Figure 4D**, *third panel, lanes 4, 5*). Thus, without the initial action of 25HC on ACAT,  
383 the lingering intracellular 25HC that inhibits new cholesterol synthesis and uptake through  
384 suppressing SREBP activation is not enough to reduce accessible PM cholesterol, even after 22  
385 hours.

386

### 387 **ACAT activation by 25HC protects cells from pore formation by bacterial cytolysins**

388 Having determined how ACAT-activating oxysterols trigger both rapid and sustained  
389 depletion of accessible cholesterol from the PM, we next sought to determine if these mechanisms  
390 are responsible for the previously reported immunological effects of 25HC. Recent studies have  
391 indicated that 25HC protects cells from pore-forming activities of bacterial cholesterol-dependent  
392 cytolysins (CDCs) that exploit accessible PM cholesterol (7, 52, 53). We used ACAT1<sup>-/-</sup> CHO-K1  
393 cells as a model to test whether ACAT activation is the primary mechanism for 25HC's protection  
394 from pore formation by two CDCs, Anthrolysin O (ALO) (54, 55) and Perfringolysin O (PFO) (56,  
395 57). Dose curve analysis showed that much lower concentrations of ALO were required to form  
396 pores in ACAT1<sup>-/-</sup> cells compared to WT cells (**Figure S6A**, *left panel*), consistent with the higher  
397 amounts of accessible cholesterol in the PMs of ACAT1<sup>-/-</sup> cells (**Figure 3B**). Moreover, stable  
398 expression of hACAT1(WT), but not inactive hACAT1(H460A), in the ACAT1<sup>-/-</sup> cells rendered them  
399 less susceptible to pore formation by ALO (**Figure S6A**, *right panel*). Similar results were  
400 obtained with PFO, although the extents of the dose dependency shifts were less dramatic  
401 (**Figure S6B**).

402 Next, we treated each of these four cell lines with 25HC for 4 hours and then measured  
403 the ability of ALO and PFO to rapidly form pores. As expected, 25HC treatment of WT cells  
404 abolished pore formation by ALO and PFO in a dose dependent manner (**Figure 5**, *first column*),  
405 consistent with 25HC's ability to deplete accessible cholesterol from the PMs of these cells  
406 (**Figure 2A**). In contrast, 25HC treatment had no effect on pore formation in ACAT1<sup>-/-</sup> cells (**Figure**  
407 **5**, *second column*) due to its inability to deplete accessible cholesterol from the PMs of these cells  
408 (**Figure 2A**). Restoration of ACAT activity by stable expression of hACAT1(WT) reestablished  
409 the ability of 25HC to abolish pore formation, whereas inactive hACAT1(H460A) was unable to  
410 do so (**Figure 5**, *third and fourth columns*). In all four cell lines, 4HC had no effects on pore  
411 formation (**Figure 5**), consistent with this oxysterol's inability to deplete accessible cholesterol  
412 from PMs (**Figure 1D**). The above data obtained with ACAT1<sup>-/-</sup> CHO-K1 cells indicates that the  
413 protective effects of 25HC on macrophage lysis by CDCs primarily relies on ACAT activation.

414

### 415 **Anti-bacterial activity of 25HC requires ACAT activation**

416 Unlike bacterial toxins that induce rapid lysis of host cells, bacterial pathogens such as  
417 *Listeria monocytogenes* can survive for long periods of time within host cells (58, 59). We have  
418 previously shown that accessible cholesterol is required for *Listeria* to form membrane protrusions  
419 at cellular junctions and spread into neighboring cells, and that 25HC treatment for 18 hours  
420 blocks this spread (6, 60). However, given that 25HC production by immune cells can be short-  
421 lived (61, 62) and accessible cholesterol depletion by 25HC occurs rapidly (**Figure 1A**), we asked  
422 if a short pulse of 25HC could suppress long-term infection by *Listeria*. The increased accessible  
423 PM cholesterol in ACAT1<sup>-/-</sup> cells did not affect invasion or cell-to-cell spread of *Listeria* as similar  
424 levels of infection were observed in both WT and ACAT1<sup>-/-</sup> cells after 22 hours (**Figure S6C**).  
425 Moreover, infection levels were similar in the ACAT1<sup>-/-</sup> cells that stably expressed either  
426 hACAT1(WT) or inactive hACAT1(H460A) (**Figure S6C**). In contrast to these results, short-term  
427 incubation of WT cells with 25HC prior to infection (followed by removal of the oxysterol) reduced  
428 *Listeria* infection in a dose dependent manner (**Figure 6A, first column**). Strikingly, this treatment  
429 had no effect on infection of ACAT1<sup>-/-</sup> cells (**Figure 6A, second column**). The anti-bacterial activity  
430 of 25HC was restored by expression of hACAT1(WT), whereas inactive hACAT1(H460A) did not  
431 reduce infection (**Figure 6A, third and fourth columns**). In all four cell lines, 4HC had no effects  
432 on *Listeria* infection (**Figure 6A**), consistent with this oxysterol's inability to deplete accessible  
433 cholesterol from PMs (**Figure 1D**).

434 Previously, we showed that genetic ablation of cholesterol 25-hydroxylase (*Ch25h*), the  
435 enzyme that produces 25HC, in mice enhanced the transmission of *Listeria* from the gut to the  
436 spleen, and that delivery of exogenous 25HC suppressed this systemic transmission (6). To  
437 determine if the protective effects of 25HC observed in these studies were dependent on ACAT1  
438 activation, we assessed the infectivity of ACAT1 global knock-out mice (63). To obtain robust  
439 mucosal infection, we used a murinized *Listeria monocytogenes* EGD strain carrying a mutation  
440 in Internalin A that enhances its binding affinity for mouse E-cadherin (*Lm-InIA<sup>m</sup>*) (64). Consistent  
441 with our previous studies, transmission of *Lm-InIA<sup>m</sup>* to liver and spleen tissues was significantly  
442 reduced in ACAT1<sup>+/+</sup> mice treated with 25HC (**Figure 6B, top row**). However, 25HC was unable  
443 to protect ACAT1<sup>-/-</sup> mice from *Lm-InIA<sup>m</sup>* infection (**Figure 6B, bottom row**). In contrast to what we  
444 observed in liver and spleen tissues, we observed no difference in *Lm-InIA<sup>m</sup>* levels in the caecal  
445 tissues of ACAT1<sup>+/+</sup> and ACAT1<sup>-/-</sup> mice upon 25HC treatment (**Figure 6B**), indicating that 25HC  
446 protects the organism from systemic transmission and not initial bacterial invasion of the gut  
447 epithelium. These data are consistent with those obtained in cultured cells and provide evidence  
448 that 25HC elicits long-term protective effects *in vivo* through activation of ACAT.

449

450 **25HC does not protect ACAT-deficient cells from infection by two model viruses**

451 The above studies show that ACAT activation by 25HC is a defense mechanism used by  
452 cells to combat bacteria and their toxins. 25HC has also been shown to suppress highly  
453 pathogenic viruses including human immunodeficiency virus (HIV), Ebola virus, Nipah virus, Rift  
454 Valley fever virus, Zika virus (ZIKV), and SARS-CoV-2, the causative agent of COVID-19 (8, 65-  
455 68). We asked if the anti-viral activity of 25HC was also due to the long-lasting depletion of  
456 accessible PM cholesterol initiated by ACAT activation. We focused on infection by ZIKV and the  
457 model human coronavirus (hCoV-OC43) in Huh7.5 cells, a human hepatoma cell line that is  
458 permissive to viral infection due to defects in innate immune signaling (69, 70).

459 To test whether 25HC's antiviral effects in Huh7.5 cells were due to activation of ACAT,  
460 we first needed to generate an Huh7.5 cell line that lacked ACAT activity. Unlike the CHO-K1  
461 cells used above, ACAT activity in Huh7.5 cells arises from two isoforms of ACAT, ACAT1 and  
462 ACAT2 (71). Therefore, we used CRISPR-Cas9 technology to disrupt both ACAT1 and ACAT2  
463 genes in Huh7.5 cells, and the resulting cells were designated as Huh7.5<sup>ΔACAT</sup> cells (**Figure S7A**  
464 and **Methods**). ACAT enzymatic activity, as judged by cholesteryl [<sup>14</sup>C]oleate formation, was  
465 stimulated by 25HC to an expected degree in Huh7.5 cells but not in Huh7.5<sup>ΔACAT</sup> cells (**Figure**  
466 **S7B**). Consistent with the diminished ACAT activity, 25HC was unable to deplete accessible  
467 cholesterol from the PMs of the Huh7.5<sup>ΔACAT</sup> cells (**Figure S7C**).

468 We first compared the infection levels of ZIKV and hCoV-OC43 in Huh7.5 and Huh7.5<sup>ΔACAT</sup>  
469 cells after 24 hours. The ability of ZIKV to infect Huh7.5<sup>ΔACAT</sup> cells was increased by 60%  
470 compared to infection of Huh7.5 cells (**Figure 7A**, middle and right panels, gray bars). In contrast,  
471 hCoV-OC43 infection of Huh7.5<sup>ΔACAT</sup> cells was reduced by 45% compared to infection of Huh7.5  
472 cells (**Figure 7B**, middle and right panel, gray bars). Since the relative infection levels vary in  
473 opposite directions, we think it is unlikely that the differences are related to accessible PM  
474 cholesterol levels in Huh7.5 and Huh7.5<sup>ΔACAT</sup> cells. We next tested the ability of 25HC to protect  
475 Huh7.5 cells from these viruses. 25HC treatment for 4 hours reduced ZIKV and hCoV-OC43  
476 infection by 48% and 57%, respectively (**Figure 7A and B**, middle panels, orange bars).  
477 Strikingly, the protective effect of 25HC toward both viruses was severely attenuated in the  
478 Huh7.5<sup>ΔACAT</sup> cells (**Figure 7A and B**, right panels, orange bars). In all cases, treatment with 4HC  
479 did not alter infection (**Figure 7A and B**, blue bars). We also noted that accessible cholesterol  
480 was depleted from the PMs of Huh7.5 cells, but not Huh7.5<sup>ΔACAT</sup> cells, by 25HC treatment for 4  
481 hours, and that 4HC had no effects (**Figure S7C**).

482 In summary, these studies demonstrate that depletion of PM accessible cholesterol  
483 through ACAT activation is a common mechanism underlying the anti-toxin, anti-bacterial, and  
484 anti-viral properties of 25HC.

485

## 486 **Discussion**

487 Almost 50 years ago, 25HC was identified as a potent suppressor of cholesterol synthesis  
488 (72, 73). Since then, 25HC has been found to affect virtually every aspect of cholesterol  
489 homeostasis (74). Yet, the biological role of this oxysterol has remained mysterious since mice  
490 lacking CH25H, the enzyme that produces 25HC, have no defects in cholesterol metabolism (75).  
491 A role for 25HC in the immune system was first recognized with the finding that stimulation of  
492 macrophage Toll-like receptors (TLRs) induced expression of CH25H and production of 25HC,  
493 suppressing the production of immunoglobulin A by B cells as part of the adaptive immune  
494 response (61). There is also growing evidence that 25HC exhibits potent anti-bacterial and anti-  
495 viral properties (5, 76-80), but the underlying mechanisms remain unresolved. In this study, we  
496 provide a potentially unifying model for the broad immunological activities of 25HC. The model  
497 builds on recent observations that bacteria and viruses exploit a small pool of cholesterol in the  
498 host cell's PM, termed accessible cholesterol, to promote infection (6-8). We show that 25HC  
499 manipulates pathways normally used to maintain cholesterol homeostasis to i) rapidly deplete  
500 accessible PM cholesterol; and ii) maintain this depleted state over an extended period of time to  
501 deliver long-lasting protection against bacterial and viral infection.

502 A striking feature of 25HC is its ability to act within 30 – 60 minutes to deplete accessible  
503 PM cholesterol (**Figure 1A**). We found that 25HC swiftly depletes accessible PM cholesterol  
504 primarily through stimulation of ACAT's enzymatic activity, and not through its effects on LXR and  
505 SREBP transcriptional pathways (**Figures 1, 2**). Since ACAT resides in the ER, we were  
506 surprised that its activation could rapidly deplete accessible cholesterol from the membrane of a  
507 different organelle, the PM. Our studies suggest that such depletion occurs by exploiting the rapid  
508 transport pathways that normally move cholesterol between the PM and ER to maintain an  
509 equivalence of accessible cholesterol between the two membranes (**Figure 3**). Activation of  
510 ACAT siphons off some of the ER accessible cholesterol to form cholesteryl esters, which results  
511 in an imbalance in accessible cholesterol levels between the PM and the ER. The rapid  
512 movement of cholesterol between the two membranes swiftly rectifies this imbalance and leads  
513 to a net lower level of accessible cholesterol in both membranes (**Figure 3**). Thus, 25HC exploits  
514 existing cholesterol homeostatic features to rapidly deplete accessible PM cholesterol. In line

515 with this model, a prescient earlier study showed that 25HC activation of ACAT in macrophages  
516 reduces a pool of PM cholesterol that is accessible for modification by the enzyme cholesterol  
517 oxidase (81).

518 A potentially confounding observation is that stimulation of mouse macrophage TLRs by  
519 lipopolysaccharides (LPS) increases CH25H expression only for a short period of time (~4 hours),  
520 after which CH25H expression declines down to baseline levels (61, 62). How then could short-  
521 lived production of 25HC protect cells from bacterial and viral infections that occur over much  
522 longer time periods? Remarkably, we found that in cells exposed to 25HC for short periods of  
523 time (4 hours), accessible PM cholesterol levels remained low even after 22 hours (**Figure 4A**).  
524 This result was surprising since one would expect that depletion of accessible PM cholesterol  
525 would also deplete accessible cholesterol in the ER, leading to upregulation of SREBP  
526 transcription factors that would increase cholesterol synthesis and uptake and replenish  
527 accessible PM cholesterol. Indeed, such replenishment is observed when accessible PM  
528 cholesterol is depleted by treatment with HPCD (**Figure 4B**). In contrast, after cells were exposed  
529 to 25HC for 4 hours, the residual amounts of 25HC that remained in the cells was sufficient to  
530 maintain SREBPs in their inactive state over an extended period of 22 hours (**Figure 4A**). Thus,  
531 25HC achieves both rapid and long-lasting depletion of accessible PM cholesterol through its  
532 concerted effects on ACAT and SREBPs. Although the panel of oxysterols studied here (**Figure**  
533 **1C**) is by no means an exhaustive list, it is worth noting that the four other oxysterols that deplete  
534 accessible cholesterol from PMs through stimulation of ACAT activity (20 $\alpha$ HC, 24(R)HC,  
535 24(S)HC, and 27HC) also suppress the activation of SREBP transcription factors (**Figure 1H**). It  
536 is attractive to speculate that these other oxysterols may also regulate accessible PM cholesterol  
537 in other biological contexts.

538 The model we propose for 25HC's anti-bacterial and anti-viral functions is dependent on  
539 ACAT activation as the initiator of rapid depletion of accessible PM cholesterol. In the absence  
540 of ACAT activity, 25HC loses the ability to protect cells from lysis by cytolytins secreted by  
541 *Clostridium perfringens* and *Bacillus anthracis* (**Figure 5**), infection by *Listeria monocytogenes*  
542 (**Figure 6A**), and infection by Zika virus and coronaviruses (**Figure 7**). In mammalian cells, ACAT  
543 activity arises from two isoforms – ACAT1 and ACAT2 (20). While ACAT activity can be  
544 completely abolished in cultured cells through CRISPR-mediated deletion of either or both  
545 isoforms of ACAT, an animal knockout of both isoforms of ACAT is not currently available.  
546 However, 25HC's ability to protect against infection by *Listeria monocytogenes* was completely  
547 lost in ACAT1-deficient mice (**Figure 6B**). Further studies are needed to identify the cell types

548 targeted by 25HC since the ACAT1-deficient mice lost ACAT activity in peritoneal macrophages  
549 and adrenal tissue, but not in the liver (63).

550 An outstanding question that has yet to be answered is how pathogens exploit accessible  
551 PM cholesterol for infection and how 25HC-mediated loss of accessible PM cholesterol provides  
552 immune protection. In the case of cytolysins such as Perfringolysin O and Anthrolysin O that bind  
553 accessible cholesterol on the outer PM leaflet, oligomerize, and form lytic pores, it is plausible  
554 that depletion of accessible PM cholesterol would confer protection by preventing cytolysin  
555 binding. However, how depletion of accessible PM cholesterol protects against intracellular  
556 pathogens such as *Listeria monocytogenes* or viruses remains largely unknown. We suspect that  
557 accessible PM cholesterol regulates the activities of one or more protein receptors involved in  
558 these processes, as has been shown for proteins in the Hedgehog signaling pathway (82). It is  
559 worth noting that cholesterol has been implicated in the regulation of several immune receptor  
560 signaling complexes (83, 84). Thus, the principles and tools described in the current study  
561 promise to aid in uncovering the mechanisms by which accessible PM cholesterol is exploited by  
562 pathogens and is mobilized by the host immune system through 25HC and other functionally  
563 related oxysterols.

564



565

## 566 **Acknowledgements**

567 We thank Francisco Bautista for his assistance during the early stages of generating ACAT-  
568 deficient cells; Danya Vazquez, Bilkish Bajaj, and Chieu Nguyen for excellent technical  
569 assistance; Lisa Beatty, Camille Harry, Ijeoma Dukes, and Alex Hatton for cell culture assistance;  
570 and members of all our laboratories for helpful discussions. K.A.J. is the recipient of a  
571 postdoctoral fellowship from the Hartwell Foundation. We are grateful for support from the  
572 National Institutes of Health (AI158357 to A.R. and N.M.A., HL20948 to A.R., AI083359 to N.M.A,  
573 and 5T32AI007520 to D.B.H.), the Welch Foundation (I-1731 to N.M.A., I-1793 to A.R.), and the  
574 Fondation Leducq (19CVD04 to A.R.).

575

## 576 **Author Contributions**

577 D.B.H, K.A.J., M.B.O., J.G.M., J.W.S., N.M.A., and A.R. designed research; D.B.H, K.A.J.,  
578 M.B.O., D.M., L.Z., M.T., C.C., M.E.A., and A.R. performed research; D.B.H, K.A.J., D.M., N.M.A.,  
579 and A.R. analyzed data; D.B.H, K.A.J., N.M.A., and A.R. wrote the paper.

580

## 581 **EXPERIMENTAL MODEL DETAILS**

### 582 **Mice**

583 All animal experiments were performed with the approval of the Institutional Animal Care & Use  
584 Committee (IACUC) at the University of Texas Southwestern Medical Center (Approval Reference  
585 Number: APN102346). Mice were housed in 12 h light/12 h dark cycles and given ad libitum  
586 access to food and water at the UTSW Animal Resource Center. ACAT1 global knockout  
587 (ACAT1<sup>-/-</sup>) mice were obtained from the laboratory of T.Y. Chang at Dartmouth College. To  
588 produce experimental mice, we first crossed male ACAT1<sup>-/-</sup> mice with WT C57BL/6J mice to  
589 generate heterozygous ACAT1<sup>+/-</sup> mice. ACAT1<sup>+/-</sup> mice were then inbred crossed to generate  
590 homozygous ACAT1<sup>-/-</sup> and ACAT1<sup>+/+</sup> mice. ACAT1<sup>+/+</sup> littermates were inbred crossed to generate  
591 experimental WT controls; ACAT1<sup>-/-</sup> mice were inbred crossed to generate experimental knock  
592 out mice. For each experiment, 9- to 14-week old mice (both sexes) were randomly assigned to  
593 each experimental group and the order of mouse dosing and sample collection were randomized  
594 between each group.

### 595 **Cell Lines**

596 All stock cultures of cells were grown in monolayer at 37°C in the indicated media (see **Reagents**  
597 **– Culture Media** in **Method Details**). CHO-K1 cells (*Cricetulus griseus*; female; ovary) were  
598 maintained in medium B in 8.8% CO<sub>2</sub>. Scap-deficient SRD13A cells (*Cricetulus griseus*; female;  
599 ovary) (43) and Site-2 protease-deficient cells (*Cricetulus griseus*; female; ovary), in which  
600 expression of the nuclear forms of each of SREBP-1a, -1c, or -2 can be induced by muristerone  
601 A (51), were maintained in medium B supplemented with 1 mM sodium mevalonate, 20 μM  
602 sodium oleate, and 5 μg/ml cholesterol in 8.8% CO<sub>2</sub>. HEK293A cells (human; female; kidney  
603 epithelial), LXRα/β-deficient cells (human; female; kidney epithelial) (6), HEK293T (human;  
604 female; kidney epithelial), and Huh7.5 cells (human; male; liver epithelial) were maintained in  
605 medium D in 5% CO<sub>2</sub>. To guard against potential genomic instability, all cell lines were passaged  
606 for less than 6 weeks, after which a fresh aliquot of cells was thawed and propagated. All cell  
607 lines were confirmed to be free of mycoplasma contamination using the LookOut® Mycoplasma  
608 PCR Detection Kit (Sigma).

### 609 **Bacterial Strains**

610 For all *Listeria* infections, *Listeria monocytogenes* 10403s was grown overnight in BHI medium  
611 supplemented with 100 μg/ml streptomycin at 30°C without shaking. *Listeria monocytogenes*  
612 EGD was grown overnight BHI medium at 30°C without shaking.

### 613 **Viruses**



614 ZIKV-MR766-Venus was propagated in Huh7.5 cells as previously described (85). hCoV-OC43  
615 was obtained from ATCC (Cat#VR-1558) and stored at -80°C until use.

616

## 617 **METHOD DETAILS**

618

### 619 **Reagents**

#### 620 ***Buffers***

621 Buffer A contains 50 mM Tris-HCl (pH 7.5), 150 mM NaCl, and 1 mM tris (2-carboxyethyl)  
622 phosphine (TCEP). Buffer B contains 10 mM Tris-HCl (pH 6.8), 100 mM NaCl, 1% (w/v) SDS, 1  
623 mM EDTA, 1 mM EGTA, 20 µg/ml phenylmethylsulfonyl fluoride, and protease inhibitors (1 tablet/  
624 20 ml). Buffer C is PBS supplemented with 4% (v/v) paraformaldehyde. Buffer D is PBS  
625 supplemented with 2% (w/v) bovine serum albumin. Buffer E is PBS supplemented with 3% (w/v)  
626 FCS. Buffer F is PBS supplemented with 1 mM EDTA. Buffer G is Hank's Balanced Salt Solution  
627 (HBSS) supplemented with 10% (v/v) FCS.

#### 628 ***Culture Media***

629 Medium A is a 1:1 mixture of Ham's F-12 and Dulbecco's modified Eagle's medium (DMEM)  
630 supplemented with 100 units/ml penicillin and 100 µg/mL streptomycin sulfate. Medium B is  
631 medium A supplemented with 5% (v/v) FCS. Medium C is medium A supplemented with 5% (v/v)  
632 LPDS, 50 µM sodium compactin, and 50 µM sodium mevalonate. Medium D is DMEM (high  
633 glucose) supplemented with 5% (v/v) FCS, 100 units/ml penicillin, and 100 µg/mL of streptomycin  
634 sulfate. Medium E is DMEM (high glucose) supplemented with 10% (v/v) FCS and 1X MEM non-  
635 essential amino acids (NEAA). Medium F is medium E supplemented with 100 units/ml penicillin  
636 and 100 µg/mL streptomycin sulfate. Medium G is DMEM (high glucose) supplemented with 3%  
637 (v/v) FCS and 1X NEAA. Medium H is medium A supplemented with 1X NEAA, 20 mM HEPES  
638 (pH 7.4), and 4 µg/ml hexadimethrine bromide. Medium I is medium B without penicillin or  
639 streptomycin sulfate.

#### 640 ***ACAT-deficient cell lines***

641 Mammalian cells express two isoforms of ACAT, ACAT1 (also designated as SOAT1) and  
642 ACAT2 (also designated as SOAT2), both of which convert cholesterol to cholesteryl esters.  
643 Previous studies have shown that ~99% of ACAT activity in CHO cells arises from ACAT1 (40,  
644 41), whereas ACAT activity in Huh7.5 cells arises from both ACAT1 and ACAT2 (71). To generate

645 cells that lacked ACAT activity, we therefore disrupted the ACAT1 gene in CHO-K1 cells and both  
646 the ACAT1 and ACAT2 genes in Huh7.5 cells using CRISPR-Cas9 technology (86).

647 To generate mutant CHO-K1 cells, guide RNAs targeting exons 2 (5'-  
648 AGGAACCGGCTGTCAAATC-3') and 14 (5'-ATAGCTCAAGCAGACAGCGA-3') of ACAT1  
649 (**Figure S3A**) were designed using the Benchling CRISPR guide RNA design tool  
650 (<https://www.benchling.com/crispr>) and cloned into the lentiviral vector lentiCRISPR v2 (Addgene  
651 52961) (87). For lentivirus production, HEK293T cells were set up in medium E at a density of 4  
652  $\times 10^5$  cells per well of polylysine-coated 6-well plates. The next day, cells were transfected with  
653 four plasmids: i) a puromycin-selectable lentiCRISPR v2 plasmid encoding a guide targeting exon  
654 2 of ACAT1 (0.5  $\mu$ g); ii) a blasticidin-selectable lentiCRISPR v2 plasmid encoding a guide  
655 targeting exon 14 of ACAT1 (0.5  $\mu$ g); iii) a plasmid encoding HIV gag-polymerase (0.8  $\mu$ g); and  
656 iv) a plasmid encoding vesicular stomatitis virus glycoprotein (0.2  $\mu$ g). Transfections were carried  
657 out in 1 ml of medium G using X-tremeGENE 9 according to the manufacturer's protocol. After 6  
658 h, the media containing transfection reagents was removed and replaced with 1.5 ml of fresh  
659 medium G. After 48 h, the media was removed and stored, and 1.5 ml of fresh medium G was  
660 added to the cells. After an additional 24 h, media was removed and combined with the media  
661 collected after 48 h. The pooled media was supplemented with 20 mM HEPES-NaOH (pH 7.4)  
662 and 4  $\mu$ g/ml hexadimethrine bromide, a cationic polymer that increases the efficiency of lentiviral  
663 transduction, and subjected to centrifugation at 800  $\times$  g for 5 min. The supernatants containing  
664 lentiviral particle-rich media were stored at -80°C.

665 To generate ACAT1-deficient cells using this lentivirus, CHO-K1 cells were set up on day  
666 0 in medium B at a density of  $1 \times 10^5$  cells per well of a 12-well plate. On day 1, media was  
667 removed and replaced with 1 ml medium H plus 120  $\mu$ l of lentiviral particle-rich medium. The  
668 plate was then subjected to centrifugation at 1000  $\times$  g for 30 min at 37°C, following which the spin-  
669 inoculated cells were placed in a 37°C incubator with 5% CO<sub>2</sub>. After 24 h, the media was  
670 removed, cells were washed twice with PBS, following which 1 ml of medium B was added to  
671 each well. After 72 h, transduced cells were selected by virtue of their ability to survive after  
672 incubation in medium B supplemented with 6  $\mu$ g/ml puromycin and 12  $\mu$ g/ml blasticidin for 14  
673 days. During the 14-day selection period, media was removed every 2-3 days and replaced with  
674 fresh medium B supplemented with 6  $\mu$ g/ml puromycin and 12  $\mu$ g/ml blasticidin. Single cells were  
675 isolated by FACS and used to establish clonal cell lines. The ACAT1 genes in these lines were  
676 analyzed by genomic sequencing using primers to amplify exon 2 (5'-  
677 CTACAAGAGCTAGTTTCAGG-3' and 5'-CCCTGTGTGTACAGTGCCTT-3') and exon 14 (5'-

678 TCACTCACCTTGAAGACCCA-3' and 5'-GGGTTCTCTCTACACACTCA-3'). Sequencing  
679 analysis revealed one cell line that had a 4 bp deletion in both alleles of exon 14 resulting in a  
680 premature stop codon (**Figure S3A**). We did not detect any disruptions in the sequence of exon  
681 2. This cell line was designated as CHO-K1 ACAT1<sup>-/-</sup> and used for analysis of the role of ACAT1  
682 in maintaining accessible cholesterol on PMs.

683 The CHO-K1 ACAT1<sup>-/-</sup> cell line was also used as template to generate two additional cell  
684 lines expressing either WT human ACAT1 or a mutant version of human ACAT1 where H460, the  
685 catalytic histidine residue, was mutated to alanine (H460A). To achieve this goal, we used  
686 Gateway cloning methods to introduce either the WT or mutant ACAT1 gene into the  
687 pTRIP.CMV.IVSB.ires.TagRFP destination lentiviral vector (88). The ACAT1 genes were inserted  
688 upstream of two elements in the pTrip vector, an internal ribosomal entry site and Tag-RFP.  
689 Lentiviral particle-rich media was generated as described above and used to transduce the CHO-  
690 K1 ACAT1<sup>-/-</sup> cells using similar procedures as described above for CHO-K1 cells. After 72 h, the  
691 transduced cells were washed once with PBS, removed from each well of 12-well plates by  
692 trypsinization, and transferred to 10-cm dishes in medium B. This procedure was repeated until  
693 a total of  $2 \times 10^7$  cells were obtained. These cells were sorted by FACS to select RFP-positive  
694 cells from which clonal cell lines were established. Two cell lines that showed robust expression  
695 of human ACAT1 (WT or H460A versions) were selected for the studies reported here. All CHO-  
696 K1 ACAT1<sup>-/-</sup> cells were maintained under identical culture conditions as the parental CHO-K1  
697 cells.

698 To generate an ACAT-deficient Huh7.5 cell line, we used CRISPR/Cas technology to first  
699 delete ACAT1 in Huh7.5 cells and then deleted ACAT2 in these ACAT1-deficient cells. Guide  
700 RNAs targeting exon 6 in human ACAT1 (5'-CACCAGGTCCAAACAACGGT-3') or exon 2 in  
701 human ACAT2 (5'-GGTCCATTGTACCAAGTCCG-3') (**Figure S7A**) were designed using CHOP-  
702 CHOP (<https://chopchop.cbu.uib.no/>). These guide RNAs were cloned into either a puromycin-  
703 selectable (exon 6 of ACAT1) or a blasticidin-selectable (exon 2 of ACAT2) lentiviral vector  
704 lentiCRISPR v2, and lentiviruses were generated as described above.

705 To generate ACAT-deficient cells using these lentiviruses, Huh7.5 cells were set up on  
706 day 0 in medium E at a density of  $7 \times 10^4$  cells per well of a 12-well plate. On day 1, media was  
707 removed and replaced with 0.4 ml medium G plus 0.1 ml of lentivirus targeting exon 6 of ACAT1.  
708 After 6 h, 2 mL of medium F was added to each well without removing the lentivirus. After  
709 additional incubation for 72 h, cells from 3 wells of the 12-well plate were collected by

710 trypsinization and set up in a single well of a 6-well plate. After 24 h, the media was removed,  
711 cells were washed twice with PBS, and 2 ml of medium F supplemented with 8 µg/ml puromycin  
712 was added to each well. Puromycin selection was carried out for 14 days. During this selection  
713 period, media was removed every 2-3 days and replaced with 2 ml of fresh medium F  
714 supplemented with 8 µg/ml puromycin. After selection, single cells were isolated by FACS and  
715 set up in 96-well plates in 100 µl of medium F. Unfortunately, we were unable to establish clonal  
716 cell lines from these single-cell clones. To overcome this problem, 24 h after the isolated single  
717 cells were set up in 96-well plates, we added Huh7.5 cells ( $1.5 \times 10^3$ ) in 100 µl of medium F  
718 supplemented with additional FCS to reach a final concentration of 40% (v/v). After 5 days, 100  
719 µl of medium F without FCS was added to each well to replenish media lost to evaporation. This  
720 replenishment step was repeated on the 10<sup>th</sup> day. After 15 days, the media was removed and  
721 replaced with 200 µl of medium F supplemented with 8 µg/ml puromycin. After an additional 7  
722 days, only lentiviral-transduced cells survived, and these cells were collected by trypsinization  
723 and set up in 24-well plates in medium F supplemented with 8 µg/ml puromycin. After further  
724 selection for 3 days, surviving cells were expanded in medium F to obtain enough cells for  
725 genomic sequencing. The ACAT1 genes were analyzed using primers to amplify exon 6 (5'-  
726 CAGCGTATTAACGTTGTGGTGT-3' and 5'-GCCCAATGTTGAAACAGAAAAT-3'). Sequencing  
727 analysis of ACAT1 revealed one cell line that had a 1 bp insertion in one allele and a 63 bp  
728 deletion in the other allele, resulting in premature stop codons in both cases (**Figure S7A**). This  
729 ACAT1-deficient cell line was transduced as described above with a lentivirus targeting exon 2 of  
730 ACAT2. Selection was carried out as described above, except that medium F supplemented with  
731 6 µg/ml blasticidin was used in all selection steps. Candidate cell lines were analyzed by genomic  
732 sequencing using primers to amplify exon 2 of ACAT2 (5'-CAACTTCCCCTTCTAGTAGCCC-3'  
733 and 5'-CTTTATCACCAAGCCTCACTCC-3'). Sequencing analysis of ACAT2 revealed one cell  
734 line that had a 7 bp deletion in one allele and a 1 bp insertion in the other allele, resulting in  
735 premature stop codons in both cases (**Figure S7A**). This cell line, designated as Huh7.5<sup>ΔACAT</sup>,  
736 was maintained under identical culture conditions as the parental Huh7.5 cells and used for further  
737 studies involving viral infections.

### 738 **Protein purification and labeling**

739 Recombinant His<sub>6</sub>-FLAG-ALOD4 and His<sub>6</sub>-Neon-FLAG-ALOD4 (designated as fALOD4-  
740 Neon) were purified by nickel chromatography followed by gel filtration chromatography as  
741 described previously (89). In some cases, the lone engineered cysteine on purified His<sub>6</sub>-FLAG-  
742 ALOD4 was labeled with fluorescein-5-maleimide as described previously for other maleimide

743 dyes (90) and the fluorescent protein was designated as fALOD4-fluorescein. Recombinant OlyA-  
744 His<sub>6</sub> was purified by nickel chromatography followed by gel filtration chromatography as described  
745 previously (29). In some cases, the lone engineered cysteine on purified OlyA-His<sub>6</sub> was labeled  
746 with either Alexa Fluor 647 C<sub>2</sub>-maleimide or fluorescein-5-maleimide as described previously (29),  
747 and the fluorescent proteins were designated as fOlyA-647 or fOlyA-fluorescein, respectively.  
748 Recombinant His<sub>6</sub>-tagged versions of full-length (FL) ALO and PFO were purified by nickel  
749 chromatography followed by gel filtration as described previously (28). fALOD4-Neon and fOlyA-  
750 647, in buffer A supplemented with 20% (v/v) glycerol, were flash frozen in liquid N<sub>2</sub> and stored at  
751 -80°C for up to six months. The fluorescein-labeled proteins were stored in buffer A at 4°C and  
752 used within two weeks. His<sub>6</sub>-FLAG-ALOD4, His<sub>6</sub>-ALO(FL), His<sub>6</sub>-PFO(FL), and OlyA-His<sub>6</sub> were  
753 stored in buffer A at 4°C and used within one month.

## 754 **Assays**

### 755 ***Immunoblot analysis***

756 After indicated treatments, cells were harvested as described previously (30). The  
757 following primary antibodies were used: anti-His (1:1,000 dilution) to detect His<sub>6</sub>-FLAG-ALOD4  
758 and OlyA-His<sub>6</sub>, anti-β actin (1:1,000 dilution) to detect actin, anti-ACAT1 (1:1,000 dilution) to  
759 detect ACAT1, IgG-7D4 (10 μg/mL) to detect SREBP2, and anti-FLAG (1:1,000 dilution) to detect  
760 muristerone-induced nuclear forms of SREBPs. Bound antibodies were visualized using a  
761 1:5,000 dilution of either donkey anti-mouse IgG (Jackson ImmunoResearch) or goat anti-rabbit  
762 IgG (Jackson ImmunoResearch) conjugated to horseradish peroxidase. Membranes were  
763 exposed to either Phoenix Blue X-Ray film (Phoenix Research Products) or UltraCruz  
764 Autoradiography (Santa Cruz Biotechnology) at room temperature for 1-120 s for all cases.

### 765 ***Cell surface binding of ALOD4 or OlyA after treatment with oxysterols***

766 On day 0, cells were set up as indicated in the Figure Legends. On day 1, media was  
767 removed, cells were washed twice with PBS, then treated with media containing the indicated  
768 concentration of oxysterols solubilized in ethanol. In each experiment, the amount of ethanol  
769 added to each well was held constant (maximum 0.2%). After incubation for the indicated times,  
770 media was removed and replaced with media supplemented with 3 μM of either His<sub>6</sub>-Flag-ALOD4  
771 or OlyA-His<sub>6</sub>. After incubation for 30 min at 37°C, cells were washed twice with PBS, harvested  
772 in buffer B, and equal aliquots were subjected to immunoblot analysis using anti-His and anti-  
773 actin antibodies. In some cases, the immunoblot signals were quantified by densitometry analysis  
774 using ImageJ as follows. In each experiment (dose curve or time curve), the anti-actin and anti-

775 His immunoblot signals for each condition were quantified. The actin signal for each condition  
776 was divided by the highest value for the actin immunoblot signal in that experiment to generate  
777 relative values for actin signal. Next, the His immunoblot signal for each condition was divided  
778 by the relative actin signal for that condition to generate a normalized His signal for each condition.  
779 The normalized His signal at the zero-timepoint or zero-concentration was set to 100% and all  
780 other values were reported relative to this value. Further details can be found in the Figure  
781 Legends.

## 782 ***Microscopy***

783 Cells were treated with oxysterols and fluorescent sensor proteins as indicated in Figure  
784 Legends. Oxysterols were solubilized in ethanol and the amount of ethanol added during each  
785 treatment was held constant (maximum 0.2%). After treatment, cells were washed twice with  
786 PBS and then fixed with 500  $\mu$ l of buffer C. After incubation at room temperature (RT) for 15 min,  
787 cells were washed 4 times with PBS and then treated with 500  $\mu$ l of buffer D. After incubation on  
788 an orbital shaker at RT for 30 min, buffer D was removed and replaced with 500  $\mu$ l of buffer D  
789 supplemented with 1  $\mu$ g/ml DAPI. After further incubation on an orbital shaker at RT for 30 min,  
790 cells were washed twice with PBS and either imaged immediately or post-fixed with 500  $\mu$ l buffer  
791 C and imaged at a later time. Images were acquired on a Nikon Eclipse *Ti* epifluorescence  
792 microscope with a 60x objective.

## 793 ***Measuring ALOD4 and OlyA binding to cells by flow cytometry***

794 Cells were set up in 24-well plates on day 0 and subjected to treatments as indicated in  
795 the Figure Legends. On day 2, after incubation with fluorescent sensor proteins at 37°C for 30  
796 min, media was removed, cells were washed twice with 500  $\mu$ l of PBS followed by addition of 100  
797  $\mu$ l of Accumax. After incubation at 37°C for 5 min, detached cells were transferred to a 96-well  
798 plate where each well contained 100  $\mu$ l of PBS supplemented with 2% (v/v) PFA. After incubation  
799 on ice for 20 min, cells were subjected to centrifugation at 1,000 x g for 5 min at RT. The  
800 supernatant was removed and the cell pellets were resuspended in 150  $\mu$ l of buffer E and  
801 subjected to FACS analysis using a Stratadigm S100 EX Flow Cytometer. Data was analyzed  
802 using FlowJo software version 10.

## 803 ***Quantification of intracellular levels of 25HC***

804 Cells were set up in 24-well plates on day 0 and subjected to treatments as indicated in  
805 the Figure Legends. Mass spectrometry analysis of the cellular content of 25HC was performed



806 as described previously (91). Briefly, lipids were extracted from cellular fractions using a modified  
807 Bligh and Dyer extraction procedure with a 1:1:1 mixture of methanol, dichloromethane, and PBS.  
808 The organic extracts were saponified to generate a pool of free oxysterols, which were further  
809 purified using solid-phase extraction. Samples were evaporated under a gentle stream of nitrogen  
810 and reconstituted in 90% methanol. 25HC levels were measured with isotope dilution mass  
811 spectrometry using a deuterated analog of 25-hydroxycholesterol (d6) added to the sample prior  
812 to extraction as a standard for quantification. Lipid extracts were resolved and detected using  
813 high performance liquid chromatography (HPLC) coupled to a triple quadrupole mass  
814 spectrometer (MS) through an electrospray ionization interface. The content of 25HC in whole  
815 cells is expressed relative to the protein content in those same cells as determined with a BCA  
816 protein assay kit.

### 817 ***Cholesterol esterification***

818 Incorporation of [<sup>14</sup>C] oleate into cholesteryl [<sup>14</sup>C] oleate in cultured cells after oxysterol  
819 addition was determined using previously described methods (33).

### 820 ***Measuring ALOD4 binding to red blood cells***

821 Red blood cells (RBCs) were isolated from rabbit whole blood (Innovative Research; Novi,  
822 MI) using a previously described procedure (31). Briefly, rabbit whole blood was subjected to  
823 centrifugation at 200 x g for 10 min at 4°C. The supernatant was removed, and the cell pellet was  
824 resuspended in an equal volume of ice-cold Buffer F and then subjected to centrifugation at 500  
825 x g for 10 min at 4°C. The supernatant was removed, and the cell pellet was resuspended in an  
826 equal volume of ice-cold Buffer F and then subjected to centrifugation at 1000 x g for 20 min at  
827 4°C. After removing the supernatant, the cell pellet was resuspended in 9 volumes of Buffer F  
828 and stored at 4°C for up to 7 days.

829 For each binding assay, RBCs (500 µl) were incubated without or with 5 µM of the  
830 indicated oxysterols for 4 h, or 1% (w/v) HPCD at RT for 1 h. As controls for hemolysis, RBCs  
831 (500 µl) were incubated with 1% (v/v) Triton-X100 for 4 h. After incubations, aliquots of the binding  
832 assays were transferred to new tubes. One aliquot (200 µl) was transferred to a tube containing  
833 5 µl of a stock solution of fALOD4-Neon (final concentration of 1 µM) and incubated at RT for 30  
834 min. A portion of this mixture (150 µl) was then transferred to a 96-well plate and fALOD4-Neon  
835 binding was measured by analyzing 10,000 RBCs for each condition on a Stratadigm S1000 EX  
836 Flow Cytometer (BD Biosciences). Fluorescently labeled RBCs were analyzed using FlowJo

837 software version 10 (Ashland, OR) and geometric mean fluorescent intensity (gMFI) of each  
838 population was calculated to quantify fALOD4-Neon binding. The other aliquot (250  $\mu$ l) was  
839 subjected to centrifugation (350 x g for 15 min at 20°C) and a portion of the supernatant (125  $\mu$ l)  
840 was transferred to 96-well plates. The absorbance at 540 nm was measured using a microplate  
841 reader (FLUOstar Optima) to assess hemoglobin release from lysed red blood cells. In all  
842 treatments, hemolysis was less than 10%.

#### 843 ***Measuring pore formation by full-length PFO or ALO***

844 To measure the dose dependence for pore formation by PFO and ALO, cells were set up  
845 in 48-well plates on day 0 as indicated in the Figure Legends. On day 1, media was removed,  
846 cells were washed twice with HBSS, followed by addition of HBSS containing either His<sub>6</sub>-PFO(FL)  
847 or His<sub>6</sub>-ALO(FL). After incubation for 15 min at 37°C, media was removed, cells were washed  
848 once with HBSS, then treated for 10 min at RT in the dark (wrapped in aluminum foil) with 100  $\mu$ l  
849 of HBSS supplemented with Ghost Dye<sup>TM</sup> Violet 450 (1:1000), a dye that labels primary amines  
850 and is commonly used to assess membrane integrity. The labeling reaction was quenched by  
851 addition of 500  $\mu$ l of buffer G for 2 min, after which the media was removed and replaced with 100  
852  $\mu$ l of Accumax, following which detached cells were transferred to a 96-well plate where each well  
853 contained 100  $\mu$ l of HBSS supplemented with 2% (v/v) PFA. After incubation for 20 min at 4°C,  
854 cells were subjected to centrifugation at 800 x g for 5 min at 20°C. The supernatant was removed  
855 and the cell pellets were resuspended in 150  $\mu$ l of buffer E and subjected to FACS analysis using  
856 a Stratadigm S100 EX Flow Cytometer. Data was analyzed using FlowJo software version 10.  
857 Pore formation was assessed as the percentage of cells that were labeled by Ghost Dye<sup>TM</sup> Violet  
858 450. The highest percentage value for each cell line treated with either His<sub>6</sub>-PFO(FL) or His<sub>6</sub>-  
859 ALO(FL) was set to 100, and all other values for that cell line were normalized to this set-point.

860 To assess the effects of oxysterols on pore formation, cells were set up in 48-well plates  
861 on day 0 as indicated in the Figure Legends. On day 1, media was removed and replaced with  
862 medium B supplemented with varying concentrations of the indicated oxysterol. After incubation  
863 for 4 h at 37°C, media was removed, cells were washed twice with 500  $\mu$ l of HBSS, followed by  
864 addition of HBSS containing either 100 pM of His<sub>6</sub>-PFO(FL) or 500 pM of His<sub>6</sub>-ALO(FL). Pore  
865 formation was assessed as described above. The percentage of cells with pore formation in the  
866 absence of oxysterol treatment was set to 100% for each replicate, and all other values were  
867 normalized to this set-point.

#### 868 ***Inhibition of *Listeria monocytogenes* infection by oxysterols in cultured cells***



869 All cell culture steps were carried out in an incubator at 37°C and 5% CO<sub>2</sub>. On day 0, the  
870 indicated CHO-K1 cell lines were set up in Medium I at a density of 1 x 10<sup>5</sup> cells per well of a 24-  
871 well plate. Also on day 0, a glycerol stock of *Listeria monocytogenes* strain 10403s expressing  
872 green fluorescent protein (GFP; kindly provided by D. Portnoy, UC Berkeley) was used to  
873 inoculate 3 ml of brain heart infusion (BHI) medium supplemented with 100 µg/ml streptomycin.  
874 After incubation for 16 – 18 h at 30°C without shaking, 1 ml of the *Listeria* culture was subjected  
875 to centrifugation at 16,000 x g for 1 min at RT. The cell pellet was resuspended in 1 ml of PBS  
876 and the centrifugation step was repeated. The resulting cell pellet was resuspended in 1 ml of  
877 PBS and the optical density at 600 nm (OD<sub>600</sub>) was measured. Also on day 1, media for the CHO-  
878 K1 cells was supplemented with the indicated concentrations of oxysterols. After 4 h, the cells  
879 were infected with the *Listeria* in PBS at a multiplicity of infection (MOI) of 1 for 90 min. Cells  
880 were then washed twice with 1 ml of PBS that had been pre-warmed to 37°C, followed by addition  
881 of 1 ml of Medium I supplemented with 50 µg/ml of gentamicin to kill extracellular bacteria and  
882 prevent new infections. After 20 h at 37°C, media was removed, cells were washed twice with 1  
883 ml of PBS, and harvested with 500 µl of PBS containing 0.5% (v/v) Triton X-100. To determine  
884 the extent of infection, cell lysates were serially diluted in PBS, plated on BHI agar supplemented  
885 with 100 µg/ml streptomycin, and incubated overnight at 37°C. The next day, colonies on each  
886 plate were counted. The value for the level of infection in the absence of oxysterols was set to  
887 100% for each replicate, and all other values were normalized to this set-point.

### 888 ***Inhibition of L. monocytogenes infection in a mouse model***

889 We obtained homozygous ACAT1<sup>-/-</sup> global knockout mice (63) from Dr. T.Y. Chang  
890 (Dartmouth College). On days 1 – 7, 9- to 14-week-old wild type C57BL/6J and ACAT1<sup>-/-</sup> mice  
891 were injected once daily intraperitoneally with either 25HC (5 mg/kg in 10% ethanol) or vehicle  
892 (10% ethanol). On day 3, a glycerol stock of *Listeria monocytogenes* strain EGD harboring a  
893 mutation in Internalin A that enhances its binding affinity for murine E-cadherin (*Lm-InIA<sup>m</sup>*) (64)  
894 was used to inoculate 30 ml of BHI medium. After incubation for 16-18 h at 30°C without shaking,  
895 the media containing *Lm-InIA<sup>m</sup>* was subjected to centrifugation at 4,000 x g for 20 min at 4°C. The  
896 cell pellet was resuspended in 30 ml of PBS and the centrifugation step was repeated. The  
897 resulting cell pellet was resuspended in 20 ml of PBS and the OD<sub>600</sub> was measured to quantify  
898 *Lm-InIA<sup>m</sup>*. An aliquot corresponding to 10<sup>9</sup> *Lm-InIA<sup>m</sup>*/mouse was subjected to centrifugation at  
899 4,000 x g for 15 min at 4°C, and the cell pellet was resuspended in a mixture of PBS and 50 mg/ml  
900 CaCO<sub>3</sub> (final ratio of 2:3, respectively). On day 4, the mice were orally infected with 1 x 10<sup>9</sup> *Lm-*  
901 *InIA<sup>m</sup>* intragastric gavage prior to being injected intraperitoneally with 25HC. On day 7, 4 h after

902 25HC injection, the spleen, liver, and caecum tissues of each mouse was collected. The spleens  
903 and livers were homogenized in 2 ml of PBS, and serial dilutions of the homogenates were plated  
904 on BHI agar plates to quantify *Lm*-InIA<sup>m</sup>. Caecum tissues were removed, longitudinally dissected,  
905 and caecum content was lightly scraped, followed by three sequential washes in 2 ml of PBS.  
906 Tissues were shaken in 4 ml of RPMI-1640 supplemented with 100 µg/ml of gentamicin at RT.  
907 After 30 min, tissues were vortexed for 5 sec. After an additional 30 min of shaking at RT, 10 ml  
908 of PBS was added and tissues were subjected to centrifugation at 3,000 x g for 5 min at 4°C. The  
909 supernatant was removed, replaced with 5 ml of PBS and the centrifugation step was repeated.  
910 The supernatant was removed and replaced with 2 ml of PBS. Following homogenization of the  
911 tissues, serial dilutions of the homogenates were plated on BHI agar plates to quantify *Lm*-InIA<sup>m</sup>.

### 912 ***Inhibition of viral infections by oxysterols***

913 All cell culture steps were carried out in an incubator with 5% CO<sub>2</sub> at the indicated  
914 temperatures. On day 0, Huh7.5 or Huh7.5<sup>ACAT</sup> cells were set up in medium F at a density of 8  
915 x 10<sup>4</sup> cells per well of a 24-well plate. On day 1, the media was removed and replaced with 1 ml  
916 of medium F supplemented with 5 µM of the indicated oxysterol. After 4 h at 37°C, the media  
917 was removed and replaced with 200 µl of either hCoV-OC43 virus or ZIKV-MR766-Venus virus  
918 in OptiMEM and incubated at 33°C or 37°C, respectively. After 1 h, 800 µl of medium F was  
919 added to each well and maintained at either 33°C or 37°C as indicated above. After 24 h, cells  
920 were harvested with Accumax, mixed with a 4% (v/v) stock solution of PFA in PBS (1% final  
921 concentration), and incubated for 10 min at RT, following which cells were analyzed by FACS  
922 either immediately or stored at 4°C and processed at a later time.

923 Zika-infected cells were subjected to centrifugation at 1,500 x g for 5 min at RT. The  
924 supernatants were removed, and the cell pellets were resuspended in 150 µl of buffer E prior to  
925 FACS analysis.

926 OC43-infected cells were subjected to centrifugation at 1,500 x g for 5 min at RT. The  
927 supernatants were removed, and the cell pellets were resuspended in 50 µl of BD  
928 Cytotfix/Cytoperm Solution. After incubation for 20 min at RT, 150 µl of BD Wash/Perm Solution  
929 was added to each sample, after which samples were subjected to centrifugation at 1,500 x g for  
930 5 min at RT. The supernatant was removed, and cell pellets were resuspended in 200 µl of BD  
931 Wash/Perm Solution, and subjected to centrifugation at 1,500 x g for 5 min at RT. After removing  
932 the supernatant, cell pellets were resuspended in 50 µl of anti-coronavirus group antigen antibody  
933 (1:50). After incubation for 30 min at RT, 150 µl of BD Wash/Perm Solution was added, and

934 samples were subjected to centrifugation at 1,500 x g for 5 min at RT. The supernatant was  
935 removed, and cell pellets were resuspended in 200  $\mu$ l of BD Wash/Perm Solution and subjected  
936 to centrifugation at 1,500 x g for 5 min at RT. The supernatant was removed, and cell pellets were  
937 resuspended in 50  $\mu$ l of Goat anti-mouse AlexaFluor488 (1:1000). After incubation in the dark  
938 (wrapped in aluminum foil) for 30 min at RT, 150  $\mu$ l of BD Wash/Perm Solution was added and  
939 samples were subjected to centrifugation at 1,500 x g for 5 min at RT. The supernatant was  
940 removed, and cells were resuspended in 200  $\mu$ l of BD Wash/Perm Solution and subjected to  
941 centrifugation at 1,500 x g for 5 min at RT. After this final step, the supernatant was removed,  
942 and cells were resuspended in 150  $\mu$ l of buffer E and analyzed on a Stratadigm S1000 EX Flow  
943 Cytometer using the GFP channel. Infection levels were determined as the percentage of Venus-  
944 positive cells (indicating Zika infection) or AlexaFluor488-positive cells (indicating OC43 infection)  
945 from at least 7,500 single cells per replicate, as assessed by FlowJo software.

## 946 **QUANTIFICATION AND STATISTICAL ANALYSIS**

947 All experiments were conducted at least three times with different litters of mice and with different  
948 batches of cells set up on different days. Data are shown as the mean +/- standard error of  
949 measurement (SEM), unless otherwise stated. Statistical significance was calculated using  
950 GraphPad Prism and is indicated in the figures according to the following key: non-significant (ns)  
951  $p > 0.05$ ; \*  $p \leq 0.05$ ; \*\*  $p \leq 0.01$ ; and \*\*\*  $p \leq 0.001$ .

## 952 **MATERIALS AVAILABILITY**

953 All reagents generated in this study are available from the authors with a completed Materials  
954 Transfer Agreement.

955

## 956 **TABLE OF REAGENTS**

| REAGENT or RESOURCE                                                                                | SOURCE                 | IDENTIFIER                        |
|----------------------------------------------------------------------------------------------------|------------------------|-----------------------------------|
| Antibodies                                                                                         |                        |                                   |
| Donkey Polyclonal Peroxidase-AffiniPure Anti-Mouse IgG (H+L)                                       | Jackson ImmunoResearch | Cat#715-035-150; RRID: AB_2340770 |
| Goat Polyclonal Peroxidase AffiniPure Anti-Rabbit IgG (H+L)                                        | Jackson ImmunoResearch | Cat#111-035-003; RRID: AB_2313567 |
| Mouse Monoclonal Anti-Coronavirus Group Antigen, nucleoprotein of OC-43, 229E strain, clone 542-7D | Millipore Sigma        | Cat# MAB9013; RRID:AB_95425       |
| Mouse Monoclonal Anti-FLAG M2 clone                                                                | Sigma-Aldrich          | F1804; RRID: AB_262044            |
| Mouse Monoclonal Anti-His Tag, clone HIS.H8                                                        | Millipore              | Cat#05-949; RRID: AB_492660       |
| Mouse Monoclonal Anti-SREBP2                                                                       | Ref. (92)              | IgG-7D4                           |

|                                                                                               |                                       |                                                                          |
|-----------------------------------------------------------------------------------------------|---------------------------------------|--------------------------------------------------------------------------|
| Mouse Polyclonal Goat anti-Mouse IgG (H+L) Cross-Adsorbed Secondary Antibody, Alexa Fluor 488 | Thermo Fisher Scientific              | Cat#A-11001; RRID:AB_2534069                                             |
| Rabbit Polyclonal Anti-ACAT1                                                                  | Novus                                 | Cat#NB400-141; RRID:AB_10001588                                          |
| <b>Bacterial and virus strains</b>                                                            |                                       |                                                                          |
| BL21 (DE3) pLysS <i>Escherichia coli</i> competent cells                                      | Invitrogen                            | Cat#C606003                                                              |
| hCoV-OC43                                                                                     | ATCC                                  | VR-1558                                                                  |
| <i>Listeria monocytogenes</i> 10403s                                                          | Ref. (93)                             | Gift from Dr. Daniel Portnoy, University of California, Berkeley         |
| <i>Listeria monocytogenes</i> EGD InIA <sup>mut</sup>                                         | (64)                                  | Gift from Dr. Wolf-Dieter Schubert, University of Pretoria, South Africa |
| <b>Chemicals, peptides, and recombinant proteins</b>                                          |                                       |                                                                          |
| 19-hydroxycholesterol                                                                         | Steraloids                            | Cat#C6470-000                                                            |
| 2-Hydroxypropyl- $\beta$ -cyclodextrin (HPCD)                                                 | Cyclodextrin Technologies Development | Cat#THPB-P                                                               |
| 20 $\alpha$ -hydroxycholesterol                                                               | Avanti Polar Lipids                   | Cat#700156                                                               |
| 22(R)-hydroxycholesterol                                                                      | Avanti Polar Lipids                   | Cat#700058                                                               |
| 22(S)-hydroxycholesterol                                                                      | Avanti Polar Lipids                   | Cat#700057                                                               |
| 24(R)-hydroxycholesterol                                                                      | Avanti Polar Lipids                   | Cat#700071                                                               |
| 24(S)-hydroxycholesterol                                                                      | Avanti Polar Lipids                   | Cat#700061                                                               |
| 25-hydroxycholesterol                                                                         | Avanti Polar Lipids                   | Cat#700019                                                               |
| 25-hydroxycholesterol-3-sulfate                                                               | Avanti Polar Lipids                   | Cat#700017                                                               |
| 25-hydroxycholesterol-d6                                                                      | Avanti Polar Lipids                   | Cat#700053                                                               |
| 27-hydroxycholesterol                                                                         | Avanti Polar Lipids                   | Cat#700021                                                               |
| 4',6-Diamidino-2-phenylindole dihydrochloride                                                 | Millipore Sigma                       | Cat#D8417                                                                |
| 4 $\beta$ -hydroxycholesterol                                                                 | Avanti Polar Lipids                   | Cat#700036                                                               |
| 7 $\alpha$ -hydroxycholesterol                                                                | Avanti Polar Lipids                   | Cat#700034                                                               |
| Accumax                                                                                       | Innovative Cell Technologies          | Cat#AM105                                                                |
| Alexa Fluor 647 C <sub>2</sub> -maleimide                                                     | Thermo Fisher Scientific              | Cat#A20347                                                               |
| Blasticidin S HCl                                                                             | Thermo Fisher Scientific              | Cat#A1113903                                                             |
| Bovine serum albumin                                                                          | Millipore Sigma                       | Cat#P0834                                                                |
| Brain Heart Infusion Agar                                                                     | Thermo Fisher Scientific              | Cat#DF0418                                                               |
| Brain Heart Infusion Broth                                                                    | Thermo Fisher Scientific              | Cat#DF0037                                                               |
| Cholesterol                                                                                   | Millipore Sigma                       | Cat#C8667                                                                |
| cOmplete™, EDTA-free Protease Inhibitor Cocktail                                              | Roche                                 | Cat# 05056489001                                                         |
| Dulbecco's Modified Eagle Medium (DMEM) – high glucose                                        | Sigma                                 | Cat#D6429                                                                |
| Dulbecco's Modified Eagle Medium (DMEM) – low glucose                                         | Sigma                                 | Cat#D6046                                                                |
| Dulbecco's Modified Eagle Medium (DMEM)/F-12 (1:1 mixture)                                    | Corning                               | Cat#10-090-CV                                                            |
| Dulbecco's phosphate buffered saline (PBS)                                                    | Thermo Fisher Scientific              | Cat#MT21031CV                                                            |
| Fetal Calf Serum                                                                              | Sigma-Aldrich                         | Cat#F2442                                                                |

|                                                                                                           |                                       |                                             |
|-----------------------------------------------------------------------------------------------------------|---------------------------------------|---------------------------------------------|
| Fluorescein-5-maleimide                                                                                   | Thermo Fisher Scientific              | Cat#62245                                   |
| Gentamicin                                                                                                | Quality Biological                    | Cat#120-098-661                             |
| Ghost Dye™ Violet 450                                                                                     | Tonbo biosciences                     | Cat#13-0863                                 |
| Hanks Balanced Salt Solution (HBSS)                                                                       | Millipore Sigma                       | Cat#14175-095                               |
| Hexadimethrine bromide                                                                                    | Thermo Fisher Scientific              | Cat#107689                                  |
| MEM Non-Essential Amino Acids Solution (100X)                                                             | Thermo Fisher Scientific              | Cat#11140050                                |
| Methyl-β-cyclodextrin, randomly methylated (MCD)                                                          | Cyclodextrin Technologies Development | Cat#TRMB-P                                  |
| Muristerone A                                                                                             | Sigma-Aldrich                         | Cat#M7888                                   |
| Opti-MEM                                                                                                  | Thermo Fisher Scientific              | Cat#31985062                                |
| Paraformaldehyde                                                                                          | Alfa Aesar                            | Cat#43368                                   |
| Penicillin/Streptomycin                                                                                   | Gibco                                 | Cat#15140-122                               |
| Phenylmethylsulfonyl fluoride (PMSF)                                                                      | Goldbio                               | Cat#P-470-25                                |
| Puromycin                                                                                                 | Thermo Fisher Scientific              | Cat#A1113803                                |
| Rabbit Whole Blood                                                                                        | Innovative Research                   | Cat#IGRBWBK2E10ML                           |
| Sodium compactin                                                                                          | (50)                                  | N/A                                         |
| Sodium mevalonate                                                                                         | (50)                                  | N/A                                         |
| Tris (2-carboxyethyl) phosphine Hydrochloride                                                             | Goldbio                               | Cat#TCEP1                                   |
| <b>Critical commercial assays</b>                                                                         |                                       |                                             |
| Cytofix/Cytoperm Fixation/Permeabilization Kit                                                            | BD Biosciences                        | Cat#554714; RRID: AB_2869008                |
| LookOut® Mycoplasma PCR Detection Kit                                                                     | Millipore Sigma                       | Cat# MP0035                                 |
| Microplate BCA Protein Assay Kit                                                                          | Thermo Fisher Scientific              | Cat#23252                                   |
| <b>Experimental models: Cell lines</b>                                                                    |                                       |                                             |
| Hamster: CHO-K1                                                                                           | ATCC                                  | CCL-61                                      |
| Hamster: CHO-K1 ACAT1 <sup>-/-</sup>                                                                      | This paper                            | N/A                                         |
| Hamster: CHO-K1 ACAT1 <sup>-/-</sup> ; hACAT1(WT)                                                         | This paper                            | N/A                                         |
| Hamster: CHO-K1 ACAT1 <sup>-/-</sup> ; hACAT1(H460A)                                                      | This paper                            | N/A                                         |
| Hamster: M19 (stable derivatives that express truncated dominant-positive forms of SREBP-1a, -1c, and -2) | (51)                                  | N/A                                         |
| Hamster: SRD13A                                                                                           | (43)                                  | N/A                                         |
| Human: HEK293T                                                                                            | (88)                                  | N/A                                         |
| Human: HEK293A                                                                                            | (6)                                   | N/A                                         |
| Human: HEK293A LXR $\alpha/\beta$ -deficient cells                                                        | (6)                                   | N/A                                         |
| Human: Huh7.5                                                                                             | (88)                                  | N/A                                         |
| Human: Huh7.5 <sup>ACAT</sup>                                                                             | This paper                            | N/A                                         |
| <b>Experimental models: Organisms/strains</b>                                                             |                                       |                                             |
| Mouse: C57BL/6J: Wild type                                                                                | The Jackson Laboratory                | Cat#000664                                  |
| Mouse: ACAT1 <sup>+/+</sup> : C57BL/6J <sup>ACAT1+/+</sup>                                                | This paper                            | N/A                                         |
| Mouse: ACAT1 <sup>-/-</sup> : C57BL/6J <sup>ACAT1-/-</sup>                                                | (63)                                  | Gift from Dr. T.Y. Chang, Dartmouth College |

|                                                                            |                                                    |                                                                                 |
|----------------------------------------------------------------------------|----------------------------------------------------|---------------------------------------------------------------------------------|
| <b>Oligonucleotides</b>                                                    |                                                    |                                                                                 |
| Guide RNA sequence targeted for CRISPR/Cas9 editing are listed in Table S1 | This paper                                         | N/A                                                                             |
| Primers for confirmation of CRISPR/Cas9 editing are listed in Table S2     | This paper                                         | N/A                                                                             |
| <b>Recombinant DNA</b>                                                     |                                                    |                                                                                 |
| pCDNA6.ZikaMR766.Venus3115Intron HDVr                                      | (85)                                               | N/A                                                                             |
| pGag-Pol                                                                   | Gift from Dr. Charles Rice, Rockefeller University | N/A                                                                             |
| pLentiCRISPRv2-Blast                                                       | Addgene                                            | Cat#98293                                                                       |
| plentiCRISPRv2-Puro                                                        | Addgene                                            | Cat#98290                                                                       |
| pRSET-B ALO FL                                                             | (28)                                               | N/A                                                                             |
| pRSET-B His <sub>6</sub> -FLAG-ALOD4                                       | (89)                                               | N/A                                                                             |
| pRSET-B His <sub>6</sub> -Neon-FLAG-ALOD4                                  | (89)                                               | N/A                                                                             |
| pRSET-B OlyA-His <sub>6</sub>                                              | (89)                                               | N/A                                                                             |
| pRSET-B PFO FL                                                             | (28)                                               | N/A                                                                             |
| pTRIP.CMV.hACAT1.ires.TagRFP                                               | This paper                                         | N/A                                                                             |
| pTRIP.CMV.hACAT1(H460A).ires.TagRFP                                        | This paper                                         | N/A                                                                             |
| pTRIP.CMV.IVSB.ires.TagRFP                                                 | (88)                                               | N/A                                                                             |
| pVSV-Glyoprotein                                                           | Gift from Dr. Charles Rice, Rockefeller University | N/A                                                                             |
| <b>Software and algorithms</b>                                             |                                                    |                                                                                 |
| Benchling CRISPR Guide RNA design tool                                     | Benchling                                          | <a href="https://www.benchling.com/crispr">https://www.benchling.com/crispr</a> |
| CHOP-CHOP                                                                  | (94)                                               | <a href="https://chopchop.cbu.uib.no/">https://chopchop.cbu.uib.no/</a>         |
| FlowJo                                                                     | BD (Becton, Dickinson & Co.)                       | <a href="http://www.flowjo.com">http://www.flowjo.com</a>                       |
| ImageJ                                                                     | (95)                                               | <a href="https://imagej.nih.gov/ij/">https://imagej.nih.gov/ij/</a>             |
| <b>Other</b>                                                               |                                                    |                                                                                 |
| Eclipse Ti epifluorescence microscope                                      | Nikon Inc.                                         | N/A                                                                             |
| S1000 Flow Cytometer                                                       | Stratedigm Inc.                                    | NA                                                                              |

957

958

959 **Table S1. Guide RNA sequence targeted for CRISPR/Cas9 editing**

| <b>Cell line</b> | <b>Gene – Exon</b> | <b>Target Sequence</b>  |
|------------------|--------------------|-------------------------|
| CHO-K1           | SOAT1 – Exon 2     | 5' AGGAACCGGCTGTCAAATC  |
| CHO-K1           | SOAT1 – Exon 14    | 5' ATAGCTCAAGCAGACAGCGA |
| Huh7.5           | SOAT1 – Exon 6     | 5' CACCAGGTCCAAACAACGGT |
| Huh7.5           | SOAT2 – Exon 2     | 5' GGTCCATTGTACCAAGTCCG |

960

961 **Table S2. Primers for confirmation of CRISPR/Cas9 editing**

| <b>Cell line</b> | <b>Gene – Exon</b> | <b>Primer Sequence</b>                                                   |
|------------------|--------------------|--------------------------------------------------------------------------|
| CHO-K1           | SOAT1 – Exon 2     | Forward: 5' CTACAAGAGCTAGTTTCAGG<br>Reverse: 5' CCCTGTGTGTACAGTGCCTT     |
| CHO-K1           | SOAT1 – Exon 14    | Forward: 5' TCACTCACCTTGAAGACCCA<br>Reverse: 5' GGGTTCCTCTCTACACTCA      |
| Huh7.5           | SOAT1 – Exon 6     | Forward: 5' CAGCGTATTAACGTTGTGGTGT<br>Reverse: 5' GCCCAATGTTGAAACAGAAAAT |
| Huh7.5           | SOAT2 – Exon 2     | Forward: 5' CAACTTCCCCTTCTAGTAGCCC<br>Reverse: 5' CTTTATCACCAAGCCTCACTCC |

962



## 963 **References**

- 964 1. Brown MS, Radhakrishnan A, Goldstein JL. Retrospective on Cholesterol Homeostasis:  
965 The Central Role of Scap. *Annual review of biochemistry*. 2018;87:783-807.
- 966 2. Luo J, Yang H, Song BL. Mechanisms and regulation of cholesterol homeostasis. *Nature*  
967 *reviews Molecular cell biology*. 2020;21(4):225-45.
- 968 3. Goldstein JL, Brown MS. A century of cholesterol and coronaries: from plaques to genes  
969 to statins. *Cell*. 2015;161(1):161-72.
- 970 4. Shimano H, Sato R. SREBP-regulated lipid metabolism: convergent physiology -  
971 divergent pathophysiology. *Nat Rev Endocrinol*. 2017;13(12):710-30.
- 972 5. Cyster JG, Dang EV, Reboldi A, Yi T. 25-Hydroxycholesterols in innate and adaptive  
973 immunity. *Nature reviews Immunology*. 2014;14(11):731-43.
- 974 6. Abrams ME, Johnson KA, Perelman SS, Zhang LS, Endapally S, Mar KB, et al.  
975 Oxysterols provide innate immunity to bacterial infection by mobilizing cell surface accessible  
976 cholesterol. *Nat Microbiol*. 2020;5(7):929-42.
- 977 7. Zhou QD, Chi X, Lee MS, Hsieh WY, Mkrtychyan JJ, Feng AC, et al. Interferon-mediated  
978 reprogramming of membrane cholesterol to evade bacterial toxins. *Nat Immunol*.  
979 2020;21(7):746-55.
- 980 8. Wang S, Li W, Hui H, Tiwari SK, Zhang Q, Croker BA, et al. Cholesterol 25-Hydroxylase  
981 inhibits SARS-CoV-2 and other coronaviruses by depleting membrane cholesterol. *The EMBO*  
982 *journal*. 2020;39(21):e106057.
- 983 9. van Meer G, Voelker DR, Feigenson GW. Membrane lipids: where they are and how  
984 they behave. *Nat Rev Mol Cell Biol*. 2008;9:112-24.
- 985 10. Brown MS, Goldstein JL. A receptor-mediated pathway for cholesterol homeostasis.  
986 *Science*. 1986;232(4746):34-47.
- 987 11. Simons K, Ikonen E. How cells handle cholesterol. *Science*. 2000;290(5497):1721-6.
- 988 12. McConnell HM, Radhakrishnan A. Condensed complexes of cholesterol and  
989 phospholipids. *Biochimica et biophysica acta*. 2003;1610(2):159-73.
- 990 13. Das A, Brown MS, Anderson DD, Goldstein JL, Radhakrishnan A. Three pools of plasma  
991 membrane cholesterol and their relation to cholesterol homeostasis. *eLife*. 2014;3:e02882.
- 992 14. Venkateswaran A, Laffite BA, Joseph SB, Mak PA, Wilpitz DC, Edwards PA, et al.  
993 Control of cellular cholesterol efflux by the nuclear oxysterol receptor LXR $\alpha$ . *Proc Natl Acad Sci*  
994 *USA*. 2000;97(22):12097-102.
- 995 15. Repa JJ, Mangelsdorf DJ. The role of orphan nuclear receptors in the regulation of  
996 cholesterol homeostasis. *Annual review of cell and developmental biology*. 2000;16:459-81.
- 997 16. Lange Y, Ye J, Steck TL. How cholesterol homeostasis is regulated by plasma  
998 membrane cholesterol in excess of phospholipids. *Proceedings of the National Academy of*  
999 *Sciences of the United States of America*. 2004;101(32):11664-7.
- 1000 17. Infante RE, Radhakrishnan A. Continuous transport of a small fraction of plasma  
1001 membrane cholesterol to endoplasmic reticulum regulates total cellular cholesterol. *eLife*.  
1002 2017;6:e25466.
- 1003 18. Radhakrishnan A, Sun LP, Kwon HJ, Brown MS, Goldstein JL. Direct binding of  
1004 cholesterol to the purified membrane region of SCAP: mechanism for a sterol-sensing domain.  
1005 *Molecular cell*. 2004;15(2):259-68.
- 1006 19. Sokolov A, Radhakrishnan A. Accessibility of cholesterol in endoplasmic reticulum  
1007 membranes and activation of SREBP-2 switch abruptly at a common cholesterol threshold. *J*  
1008 *Biol Chem*. 2010;285(38):29480-90.
- 1009 20. Chang T-Y, Chang CY, Ohgami N, Yamauchi Y. Cholesterol sensing, trafficking, and  
1010 esterification. *Annu Rev Cell Dev Biol*. 2006;22:129-57.



- 1011 21. Xu X, Tabas I. Lipoproteins activate acyl-coenzyme A:cholesterol acyltransferase in  
1012 macrophages only after cellular cholesterol pools are expanded to a critical threshold level. *J*  
1013 *Biol Chem*. 1991;266(26):17040-8.
- 1014 22. Chang TY, Chang CC, Cheng D. Acyl-coenzyme A:cholesterol acyltransferase. Annual  
1015 review of biochemistry. 1997;66:613-38.
- 1016 23. Lund EG, Kerr TA, Sakai J, Li WP, Russell DW. cDNA cloning of mouse and human  
1017 cholesterol 25-hydroxylases, polytopic membrane proteins that synthesize a potent oxysterol  
1018 regulator of lipid metabolism. *J Biol Chem*. 1998;273(51):34316-27.
- 1019 24. Radhakrishnan A, Ikeda Y, Kwon HJ, Brown MS, Goldstein JL. Sterol-regulated  
1020 transport of SREBPs from endoplasmic reticulum to Golgi: oxysterols block transport by binding  
1021 to Insig. *Proceedings of the National Academy of Sciences of the United States of America*.  
1022 2007;104(16):6511-8.
- 1023 25. Janowski BA, Willy PJ, Devi TR, Falck JR, Mangelsdorf DJ. An oxysterol signalling  
1024 pathway mediated by the nuclear receptor LXR alpha. *Nature*. 1996;383(6602):728-31.
- 1025 26. Brown MS, Dana SE, Goldstein JL. Cholesterol ester formation in cultured human  
1026 fibroblasts. Stimulation by oxygenated sterols. *J Biol Chem*. 1975;250(10):4025-7.
- 1027 27. Goldstein JL, Rawson RB, Brown MS. Mutant mammalian cells as tools to delineate the  
1028 sterol regulatory element-binding protein pathway for feedback regulation of lipid synthesis.  
1029 *Arch Biochem Biophys*. 2002;397(2):139-48.
- 1030 28. Gay A, Rye D, Radhakrishnan A. Switch-like responses of two cholesterol sensors do  
1031 not require protein oligomerization in membranes. *Biophys J*. 2015;108(6):1459-69.
- 1032 29. Endapally S, Frias D, Grzemska M, Gay A, Tomchick DR, Radhakrishnan A. Molecular  
1033 discrimination between two conformations of sphingomyelin in plasma membranes. *Cell*.  
1034 2019;176(5):1040-53.e17.
- 1035 30. Johnson KA, Endapally S, Vazquez DC, Infante RE, Radhakrishnan A. Ostreolysin A  
1036 and anthrolysin O use different mechanisms to control movement of cholesterol from the plasma  
1037 membrane to the endoplasmic reticulum. *J Biol Chem*. 2019;294(46):17289-300.
- 1038 31. Chakrabarti RS, Ingham SA, Kozlitina J, Gay A, Cohen JC, Radhakrishnan A, et al.  
1039 Variability of cholesterol accessibility in human red blood cells measured using a bacterial  
1040 cholesterol-binding toxin. *eLife*. 2017;6:e23355.
- 1041 32. Ohtani Y, Irie T, Uekama K, Fukunaga N, Pitha J. Differential effects of a-, b- and g-  
1042 cyclodextrins on human erythrocytes. *Eur J Biochem*. 1989;186:17-22.
- 1043 33. Goldstein JL, Basu SK, Brown MS. Receptor-mediated endocytosis of low-density  
1044 lipoprotein in cultured cells. *Methods in enzymology*. 1983;98:241-60.
- 1045 34. Horton JD, Goldstein JL, Brown MS. SREBPs: activators of the complete program of  
1046 cholesterol and fatty acid synthesis in the liver. *The Journal of clinical investigation*.  
1047 2002;109(9):1125-31.
- 1048 35. Lehmann JM, Kliewer SA, Moore LB, Smith-Oliver TA, Oliver BB, Su JL, et al. Activation  
1049 of the nuclear receptor LXR by oxysterols defines a new hormone response pathway. *J Biol*  
1050 *Chem*. 1997;272(6):3137-40.
- 1051 36. Janowski BA, Grogan MJ, Jones SA, Wisely GB, Kliewer SA, Corey EJ, et al. Structural  
1052 requirements of ligands for the oxysterol liver X receptors LXRA and LXRbeta. *Proceedings*  
1053 *of the National Academy of Sciences of the United States of America*. 1999;96(1):266-71.
- 1054 37. Ma Y, Xu L, Rodriguez-Agudo D, Li X, Heuman DM, Hylemon PB, et al. 25-  
1055 Hydroxycholesterol-3-sulfate regulates macrophage lipid metabolism via the LXR/SREBP-1  
1056 signaling pathway. *Am J Physiol Endocrinol Metab*. 2008;295(6):E1369-79.
- 1057 38. Berrodin TJ, Shen Q, Quinet EM, Yudt MR, Freedman LP, Nagpal S. Identification of 5 $\alpha$ ,  
1058 6 $\alpha$ -epoxycholesterol as a novel modulator of liver X receptor activity. *Mol Pharmacol*.  
1059 2010;78(6):1046-58.
- 1060 39. Nury T, Samadi M, Varin A, Lopez T, Zarrouk A, Boumhras M, et al. Biological activities  
1061 of the LXRA and  $\beta$  agonist, 4 $\beta$ -hydroxycholesterol, and of its isomer, 4 $\alpha$ -hydroxycholesterol, on

- 1062 oligodendrocytes: effects on cell growth and viability, oxidative and inflammatory status.  
1063 *Biochimie*. 2013;95(3):518-30.
- 1064 40. Cadigan KM, Heider JG, Chang TY. Isolation and characterization of Chinese hamster  
1065 ovary cell mutants deficient in acyl-coenzyme A:cholesterol acyltransferase activity. *J Biol*  
1066 *Chem*. 1988;263(1):274-82.
- 1067 41. Chang CC, Chen J, Thomas MA, Cheng D, Del Priore VA, Newton RS, et al. Regulation  
1068 and immunolocalization of acyl-coenzyme A: cholesterol acyltransferase in mammalian cells as  
1069 studied with specific antibodies. *J Biol Chem*. 1995;270(49):29532-40.
- 1070 42. Sakai J, Duncan EA, Rawson RB, Hua X, Brown MS, Goldstein JL. Sterol-regulated  
1071 release of SREBP-2 from cell membranes requires two sequential cleavages, one within a  
1072 transmembrane segment. *Cell*. 1996;85(7):1037-46.
- 1073 43. Rawson RB, DeBose-Boyd R, Goldstein JL, Brown MS. Failure to cleave sterol  
1074 regulatory element-binding proteins (SREBPs) causes cholesterol auxotrophy in Chinese  
1075 hamster ovary cells with genetic absence of SREBP cleavage-activating protein. *J Biol Chem*.  
1076 1999;274(40):28549-56.
- 1077 44. Lange Y, Swaisgood MH, Ramos BV, Steck TL. Plasma membranes contain half the  
1078 phospholipid and 90% of the cholesterol and sphingomyelin in cultured human fibroblasts. *J Biol*  
1079 *Chem*. 1989;264(7):3786-93.
- 1080 45. Das A, Goldstein JL, Anderson DD, Brown MS, Radhakrishnan A. Use of mutant 125I-  
1081 perfringolysin O to probe transport and organization of cholesterol in membranes of animal  
1082 cells. *Proceedings of the National Academy of Sciences of the United States of America*.  
1083 2013;110(26):10580-5.
- 1084 46. Radhakrishnan A, Goldstein JL, McDonald JG, Brown MS. Switch-like control of  
1085 SREBP-2 transport triggered by small changes in ER cholesterol: a delicate balance. *Cell*  
1086 *Metab*. 2008;8(6):512-21.
- 1087 47. Wattenberg BW, Silbert DF. Sterol partitioning among intracellular membranes. *J Biol*  
1088 *Chem*. 1983;258(4):2284-9.
- 1089 48. Radhakrishnan A, McConnell HM. Chemical activity of cholesterol in membranes.  
1090 *Biochemistry*. 2000;39(28):8119-24.
- 1091 49. Lange Y, Strebel F, Steck TL. Role of the plasma membrane in cholesterol esterification  
1092 in rat hepatoma cells. *J Biol Chem*. 1993;268(19):13838-43.
- 1093 50. Brown MS, Faust JR, Goldstein JL, Kaneko I, Endo A. Induction of 3-hydroxy-3-  
1094 methylglutaryl coenzyme A reductase activity in human fibroblasts incubated with compactin  
1095 (ML-236B), a competitive inhibitor of the reductase. *J Biol Chem*. 1978;253(4):1121-8.
- 1096 51. Pai JT, Guryev O, Brown MS, Goldstein JL. Differential stimulation of cholesterol and  
1097 unsaturated fatty acid biosynthesis in cells expressing individual nuclear sterol regulatory  
1098 element-binding proteins. *J Biol Chem*. 1998;273(40):26138-48.
- 1099 52. Ormsby TJR, Owens SE, Clement L, Mills TJ, Cronin JG, Bromfield JJ, et al. Oxysterols  
1100 Protect Epithelial Cells Against Pore-Forming Toxins. *Front Immunol*. 2022;13:815775.
- 1101 53. Ormsby TJR, Owens SE, Horlock AD, Davies D, Griffiths WJ, Wang Y, et al. Oxysterols  
1102 protect bovine endometrial cells against pore-forming toxins from pathogenic bacteria. *FASEB*  
1103 *journal : official publication of the Federation of American Societies for Experimental Biology*.  
1104 2021;35(10):e21889.
- 1105 54. Mosser EM, Rest RF. The *Bacillus anthracis* cholesterol-dependent cytolyisin,  
1106 Anthrolysin O, kills human neutrophils, monocytes and macrophages. *BMC Microbiol*.  
1107 2006;6:56.
- 1108 55. Shannon JG, Ross CL, Koehler TM, Rest RF. Characterization of anthrolysin O, the  
1109 *Bacillus anthracis* cholesterol-dependent cytolyisin. *Infection and immunity*. 2003;71(6):3183-9.
- 1110 56. Shimada Y, Maruya M, Iwashita S, Ohno-Iwashita Y. The C-terminal domain of  
1111 perfringolysin O is an essential cholesterol-binding unit targeting to cholesterol-rich  
1112 microdomains. *European journal of biochemistry / FEBS*. 2002;269(24):6195-203.

- 1113 57. Tweten RK, Hotze EM, Wade KR. The Unique Molecular Choreography of Giant Pore  
1114 Formation by the Cholesterol-Dependent Cytolysins of Gram-Positive Bacteria. *Annu Rev*  
1115 *Microbiol.* 2015;69:323-40.
- 1116 58. Portnoy DA, Auerbuch V, Glomski IJ. The cell biology of *Listeria monocytogenes*  
1117 infection: the intersection of bacterial pathogenesis and cell-mediated immunity. *J Cell Biol.*  
1118 2002;158(3):409-14.
- 1119 59. Radoshevich L, Cossart P. *Listeria monocytogenes*: towards a complete picture of its  
1120 physiology and pathogenesis. *Nat Rev Microbiol.* 2018;16(1):32-46.
- 1121 60. Abrams ME, Johnson KA, Radhakrishnan A, Alto NM. Accessible cholesterol is localized  
1122 in bacterial plasma membrane protrusions. *Journal of lipid research.* 2020;61(12):1538.
- 1123 61. Bauman DR, Bitmansour AD, McDonald JG, Thompson BM, Liang G, Russell DW. 25-  
1124 Hydroxycholesterol secreted by macrophages in response to Toll-like receptor activation  
1125 suppresses immunoglobulin A production. *Proceedings of the National Academy of Sciences of*  
1126 *the United States of America.* 2009;106(39):16764-9.
- 1127 62. Dennis EA, Deems RA, Harkewicz R, Quehenberger O, Brown HA, Milne SB, et al. A  
1128 mouse macrophage lipidome. *J Biol Chem.* 2010;285(51):39976-85.
- 1129 63. Meiner VL, Cases S, Myers HM, Sande ER, Bellosta S, Schambelan M, et al. Disruption  
1130 of the acyl-CoA:cholesterol acyltransferase gene in mice: evidence suggesting multiple  
1131 cholesterol esterification enzymes in mammals. *Proceedings of the National Academy of*  
1132 *Sciences of the United States of America.* 1996;93(24):14041-6.
- 1133 64. Wollert T, Pasche B, Rochon M, Deppenmeier S, van den Heuvel J, Gruber AD, et al.  
1134 Extending the host range of *Listeria monocytogenes* by rational protein design. *Cell.*  
1135 2007;129(5):891-902.
- 1136 65. Liu SY, Aliyari R, Chikere K, Li G, Marsden MD, Smith JK, et al. Interferon-inducible  
1137 cholesterol-25-hydroxylase broadly inhibits viral entry by production of 25-hydroxycholesterol.  
1138 *Immunity.* 2013;38(1):92-105.
- 1139 66. Li C, Deng YQ, Wang S, Ma F, Aliyari R, Huang XY, et al. 25-Hydroxycholesterol  
1140 Protects Host against Zika Virus Infection and Its Associated Microcephaly in a Mouse Model.  
1141 *Immunity.* 2017;46(3):446-56.
- 1142 67. Zu S, Deng YQ, Zhou C, Li J, Li L, Chen Q, et al. 25-Hydroxycholesterol is a potent  
1143 SARS-CoV-2 inhibitor. *Cell research.* 2020;30(11):1043-5.
- 1144 68. Zang R, Case JB, Yutuc E, Ma X, Shen S, Gomez Castro MF, et al. Cholesterol 25-  
1145 hydroxylase suppresses SARS-CoV-2 replication by blocking membrane fusion. *Proceedings of*  
1146 *the National Academy of Sciences of the United States of America.* 2020;117(50):32105-13.
- 1147 69. Blight KJ, McKeating JA, Rice CM. Highly permissive cell lines for subgenomic and  
1148 genomic hepatitis C virus RNA replication. *J Virol.* 2002;76(24):13001-14.
- 1149 70. Sumpter R, Jr., Loo YM, Foy E, Li K, Yoneyama M, Fujita T, et al. Regulating  
1150 intracellular antiviral defense and permissiveness to hepatitis C virus RNA replication through a  
1151 cellular RNA helicase, RIG-I. *J Virol.* 2005;79(5):2689-99.
- 1152 71. Pramfalk C, Jakobsson T, Verzijl CRC, Minniti ME, Obensa C, Ripamonti F, et al.  
1153 Generation of new hepatocyte-like in vitro models better resembling human lipid metabolism.  
1154 *Biochim Biophys Acta Mol Cell Biol Lipids.* 2020;1865(6):158659.
- 1155 72. Kandutsch AA, Chen HW. Inhibition of sterol synthesis in cultured mouse cells by  
1156 cholesterol derivatives oxygenated in the side chain. *J Biol Chem.* 1974;249(19):6057-61.
- 1157 73. Brown MS, Goldstein JL. Suppression of 3-hydroxy-3-methylglutaryl coenzyme A  
1158 reductase activity and inhibition of growth of human fibroblasts by 7-ketocholesterol. *J Biol*  
1159 *Chem.* 1974;249(22):7306-14.
- 1160 74. Brown AJ, Sharpe LJ, Rogers MJ. Oxysterols: From physiological tuners to  
1161 pharmacological opportunities. *Br J Pharmacol.* 2020.
- 1162 75. Russell DW. The enzymes, regulation, and genetics of bile acid synthesis. *Annual*  
1163 *review of biochemistry.* 2003;72:137-74.

- 1164 76. Spann NJ, Glass CK. Sterols and oxysterols in immune cell function. *Nat Immunol.*  
1165 2013;14(9):893-900.
- 1166 77. Blanc M, Hsieh WY, Robertson KA, Kropp KA, Forster T, Shui G, et al. The transcription  
1167 factor STAT-1 couples macrophage synthesis of 25-hydroxycholesterol to the interferon antiviral  
1168 response. *Immunity.* 2013;38(1):106-18.
- 1169 78. Gold ES, Diercks AH, Podolsky I, Podyminogin RL, Askovich PS, Treuting PM, et al. 25-  
1170 Hydroxycholesterol acts as an amplifier of inflammatory signaling. *Proceedings of the National*  
1171 *Academy of Sciences of the United States of America.* 2014;111(29):10666-71.
- 1172 79. Zhao J, Chen J, Li M, Chen M, Sun C. Multifaceted Functions of CH25H and 25HC to  
1173 Modulate the Lipid Metabolism, Immune Responses, and Broadly Antiviral Activities. *Viruses.*  
1174 2020;12(7).
- 1175 80. Griffiths WJ, Wang Y. Sterols, Oxysterols, and Accessible Cholesterol: Signalling for  
1176 Homeostasis, in *Immunity and During Development.* *Front Physiol.* 2021;12:723224.
- 1177 81. Tabas I, Rosoff WJ, Boykow GC. Acyl coenzyme A:cholesterol acyl transferase in  
1178 macrophages utilizes a cellular pool of cholesterol oxidase-accessible cholesterol as substrate.  
1179 *J Biol Chem.* 1988;263(3):1266-72.
- 1180 82. Radhakrishnan A, Rohatgi R, Siebold C. Cholesterol access in cellular membranes  
1181 controls Hedgehog signaling. *Nature chemical biology.* 2020;16(12):1303-13.
- 1182 83. Zimmerman B, Kelly B, McMillan BJ, Seegar TCM, Dror RO, Kruse AC, et al. Crystal  
1183 Structure of a Full-Length Human Tetraspanin Reveals a Cholesterol-Binding Pocket. *Cell.*  
1184 2016;167(4):1041-51.e11.
- 1185 84. Chen Y, Zhu Y, Li X, Gao W, Zhen Z, Dong D, et al. Cholesterol inhibits TCR signaling  
1186 by directly restricting TCR-CD3 core tunnel motility. *Molecular cell.* 2022;82(7):1278-87.e5.
- 1187 85. Schwarz MC, Sourisseau M, Espino MM, Gray ES, Chambers MT, Tortorella D, et al.  
1188 Rescue of the 1947 Zika Virus Prototype Strain with a Cytomegalovirus Promoter-Driven cDNA  
1189 Clone. *mSphere.* 2016;1(5).
- 1190 86. Ran FA, Hsu PD, Wright J, Agarwala V, Scott DA, Zhang F. Genome engineering using  
1191 the CRISPR-Cas9 system. *Nat Protoc.* 2013;8(11):2281-308.
- 1192 87. Sanjana NE, Shalem O, Zhang F. Improved vectors and genome-wide libraries for  
1193 CRISPR screening. *Nature methods.* 2014;11(8):783-4.
- 1194 88. Schoggins JW, Wilson SJ, Panis M, Murphy MY, Jones CT, Bieniasz P, et al. A diverse  
1195 range of gene products are effectors of the type I interferon antiviral response. *Nature.*  
1196 2011;472(7344):481-5.
- 1197 89. Johnson KA, Radhakrishnan A. The use of anthrolysin O and ostreolysin A to study  
1198 cholesterol in cell membranes. *Methods in enzymology.* 2021;649:543-66.
- 1199 90. Endapally S, Infante RE, Radhakrishnan A. Monitoring and modulating intracellular  
1200 cholesterol trafficking using ALOD4, a cholesterol-binding protein. *Methods in molecular biology*  
1201 *(Clifton, NJ).* 2019;1949:153-63.
- 1202 91. McDonald JG, Smith DD, Stiles AR, Russell DW. A comprehensive method for  
1203 extraction and quantitative analysis of sterols and secosteroids from human plasma. *Journal of*  
1204 *lipid research.* 2012;53(7):1399-409.
- 1205 92. Yang J, Brown MS, Ho YK, Goldstein JL. Three different rearrangements in a single  
1206 intron truncate sterol regulatory element binding protein-2 and produce sterol-resistant  
1207 phenotype in three cell lines. Role of introns in protein evolution. *J Biol Chem.*  
1208 1995;270(20):12152-61.
- 1209 93. Bishop DK, Hinrichs DJ. Adoptive transfer of immunity to *Listeria monocytogenes*. The  
1210 influence of in vitro stimulation on lymphocyte subset requirements. *J Immunol.*  
1211 1987;139(6):2005-9.
- 1212 94. Labun K, Montague TG, Krause M, Torres Cleuren YN, Tjeldnes H, Valen E.  
1213 CHOPCHOP v3: expanding the CRISPR web toolbox beyond genome editing. *Nucleic Acids*  
1214 *Res.* 2019;47(W1):W171-w4.

1215 95. Schneider CA, Rasband WS, Eliceiri KW. NIH Image to ImageJ: 25 years of image  
1216 analysis. *Nature methods*. 2012;9(7):671-5.  
1217



## Figure 1

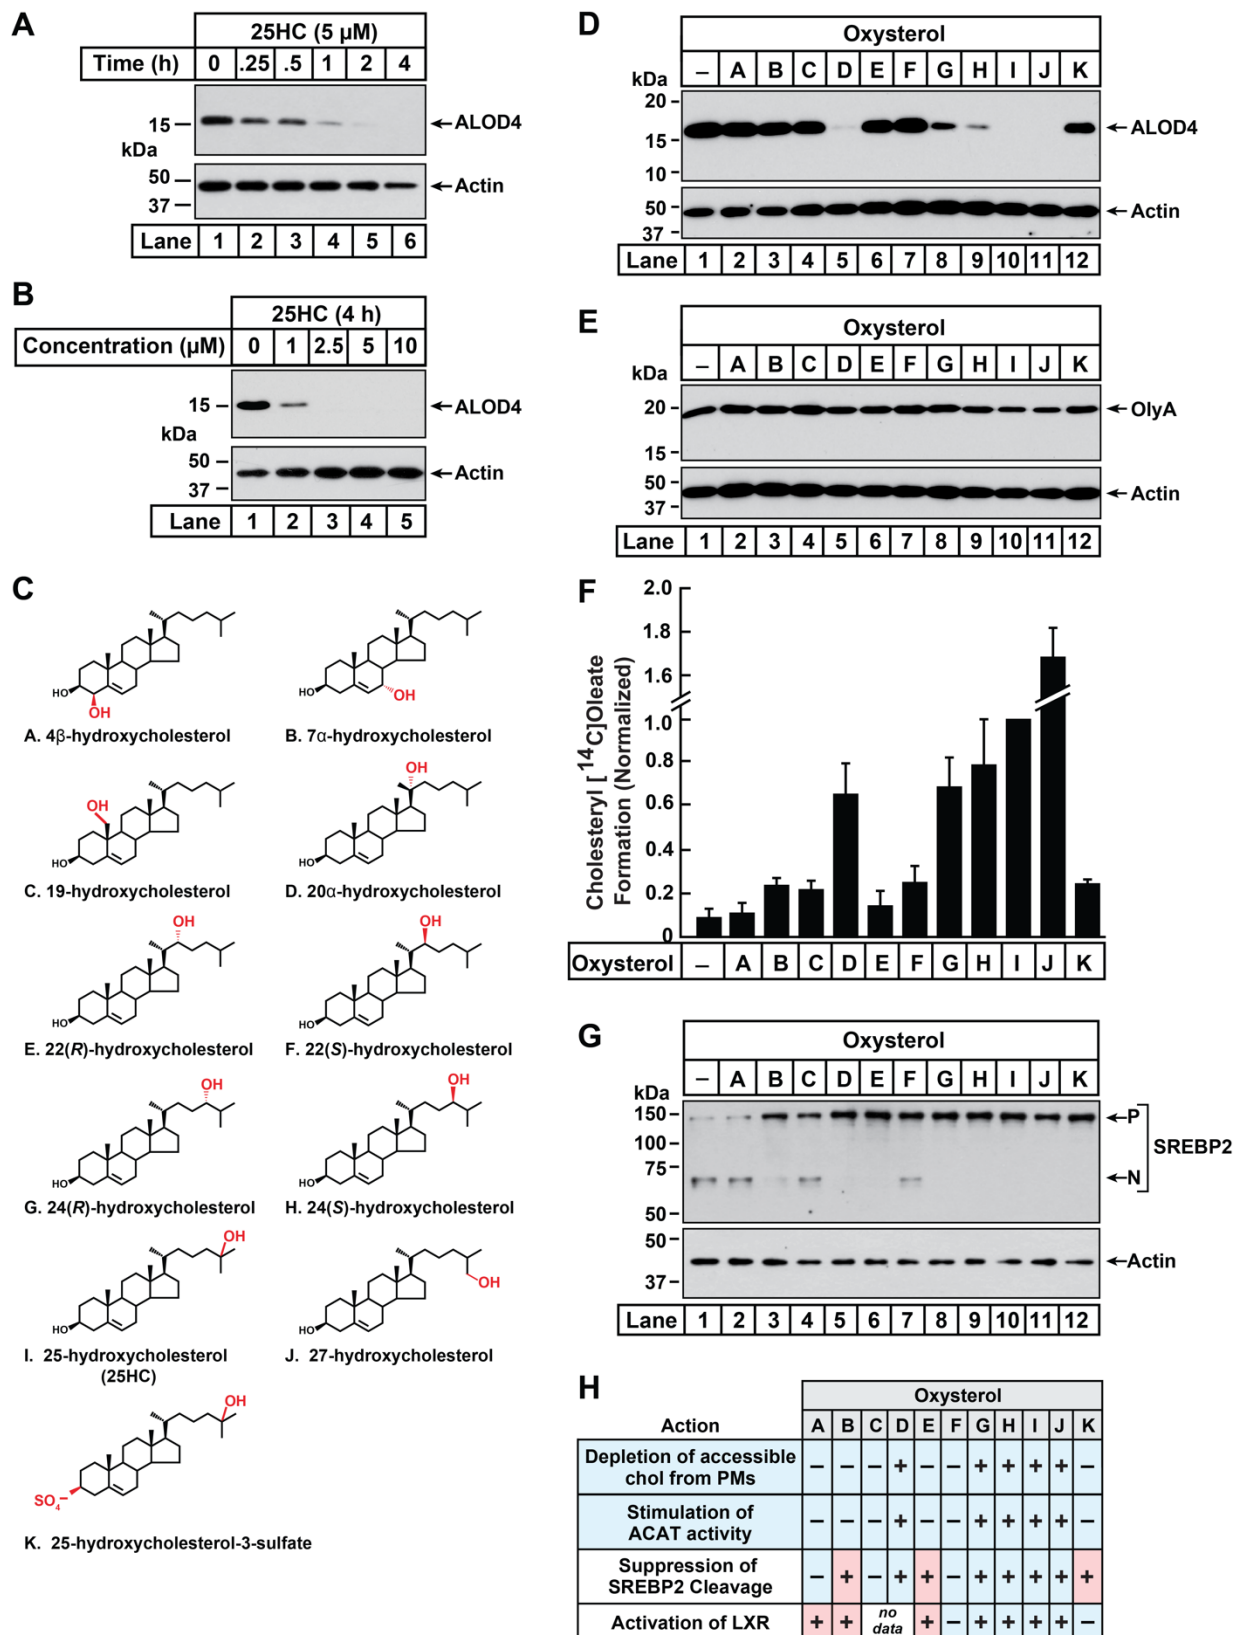



1219 **Figure 1. Comparison of oxysterol specificities for effects on PM cholesterol pools,**  
1220 **stimulation of ACAT activity, and suppression of SREBP-2 cleavage.**

1221 (A, B) Time course and dose curve analysis of 25HC treatment. On day 0, CHO-K1 cells were  
1222 set up in medium B at a density of  $6 \times 10^4$  cells per well of a 48-well plate. On day 1, media was  
1223 removed, cells were washed twice with 500  $\mu$ l of PBS followed by addition of 200  $\mu$ l of medium B  
1224 supplemented with either 5  $\mu$ M of 25HC (A) or the indicated concentrations of 25HC (B). After  
1225 incubation at 37°C for either the indicated times (A) or 4 h (B), media was removed and replaced  
1226 with 200  $\mu$ l of medium B supplemented with 3  $\mu$ M His<sub>6</sub>-Flag-ALOD4. After incubation at 37°C for  
1227 30 min, cells were washed twice with 500  $\mu$ l of PBS, harvested, and equal aliquots of cell lysates  
1228 were subjected to immunoblot analysis as described in *Methods*.

1229 (C) Chemical structures of oxysterols tested in this study. Differences from cholesterol are  
1230 highlighted in *red*.

1231 (D, E) Effects on PM cholesterol pools. On day 0, CHO-K1 cells were set up in medium B at a  
1232 density of  $6 \times 10^4$  cells per well of a 48-well plate. On day 1, media was removed, cells were  
1233 washed twice with 500  $\mu$ l of PBS followed by addition of 200  $\mu$ l of medium B supplemented with  
1234 5  $\mu$ M of the indicated oxysterol. After incubation at 37°C for 4 h, media was removed and replaced  
1235 with 200  $\mu$ l of medium B supplemented with 3  $\mu$ M of either His<sub>6</sub>-Flag-ALOD4 (D, *top panel*) or  
1236 OlyA-His<sub>6</sub> (E, *top panel*). After incubation at 37°C for 30 min, cells were washed twice with 500  
1237  $\mu$ l of PBS, harvested, and equal aliquots of cell lysates were subjected to immunoblot analysis as  
1238 described in *Methods*.

1239 (F) ACAT activity. On day 0, CHO-K1 cells were set up in medium B at a density of  $2.5 \times 10^5$   
1240 cells per 60-mm dish. On day 2, media was removed, cells were washed twice with 1 ml of PBS  
1241 followed by addition of 2 ml of cholesterol-depleting medium C. On day 3, media was removed,  
1242 cells were washed with 1 ml of PBS followed by addition of 1 ml of medium C supplemented with  
1243 5  $\mu$ M of the indicated oxysterol. After incubation at 37°C for 1 h, each dish was supplemented  
1244 with 0.2 mM sodium [<sup>14</sup>C]oleate (6500 dpm/nmol) and incubated at 37°C for an additional 2 h,  
1245 after which cells were harvested, and levels of cholesteryl [<sup>14</sup>C]oleate were measured as  
1246 described in *Methods*. Each column represents the mean of cholesterol esterification  
1247 measurements from three or more independent experiments, and error bars show the standard  
1248 error. The mean value for cholesterol esterification obtained after 25HC treatment (3.18  
1249 nmol/mg/h;  $n = 6$ ; standard error =  $\pm 0.49$  nmol/mg/h) was set to 1 and all other values were  
1250 normalized relative to this set-point.

1251 (G) SREBP-2 cleavage. On day 0, CHO-K1 cells were set up in medium B at a density of  $6 \times$   
1252  $10^4$  cells per well of a 48-well plate. On day 1, media was removed, cells were washed twice with

1253 500  $\mu$ l of PBS followed by addition of 200  $\mu$ l of cholesterol-depleting medium C supplemented  
1254 with 1% (w/v) HPCD. After incubation at 37°C for 1 h, media was removed, cells were washed  
1255 twice with 500  $\mu$ l of PBS and then treated with 200  $\mu$ l of medium C supplemented with 5  $\mu$ M of  
1256 the indicated oxysterol. After incubation at 37°C for 4 h, cells were washed twice with 500  $\mu$ l of  
1257 PBS, harvested, and equal aliquots of cell lysates were subjected to immunoblot analysis as  
1258 described in *Methods*. *P*, precursor form of SREBP2; *N*, cleaved nuclear form of SREBP2.

1259 (H) Summary of oxysterol specificities for depletion of accessible cholesterol from PMs,  
1260 suppression of SREBP2 cleavage, activation of LXR transcription factors, and stimulation of  
1261 ACAT activity. The degree of effect (maximal or minimal) is denoted by + and –, respectively.  
1262 Specificities that are different from that for depletion of accessible cholesterol from PMs (first row)  
1263 are shaded *red*.

1264

## Figure 2

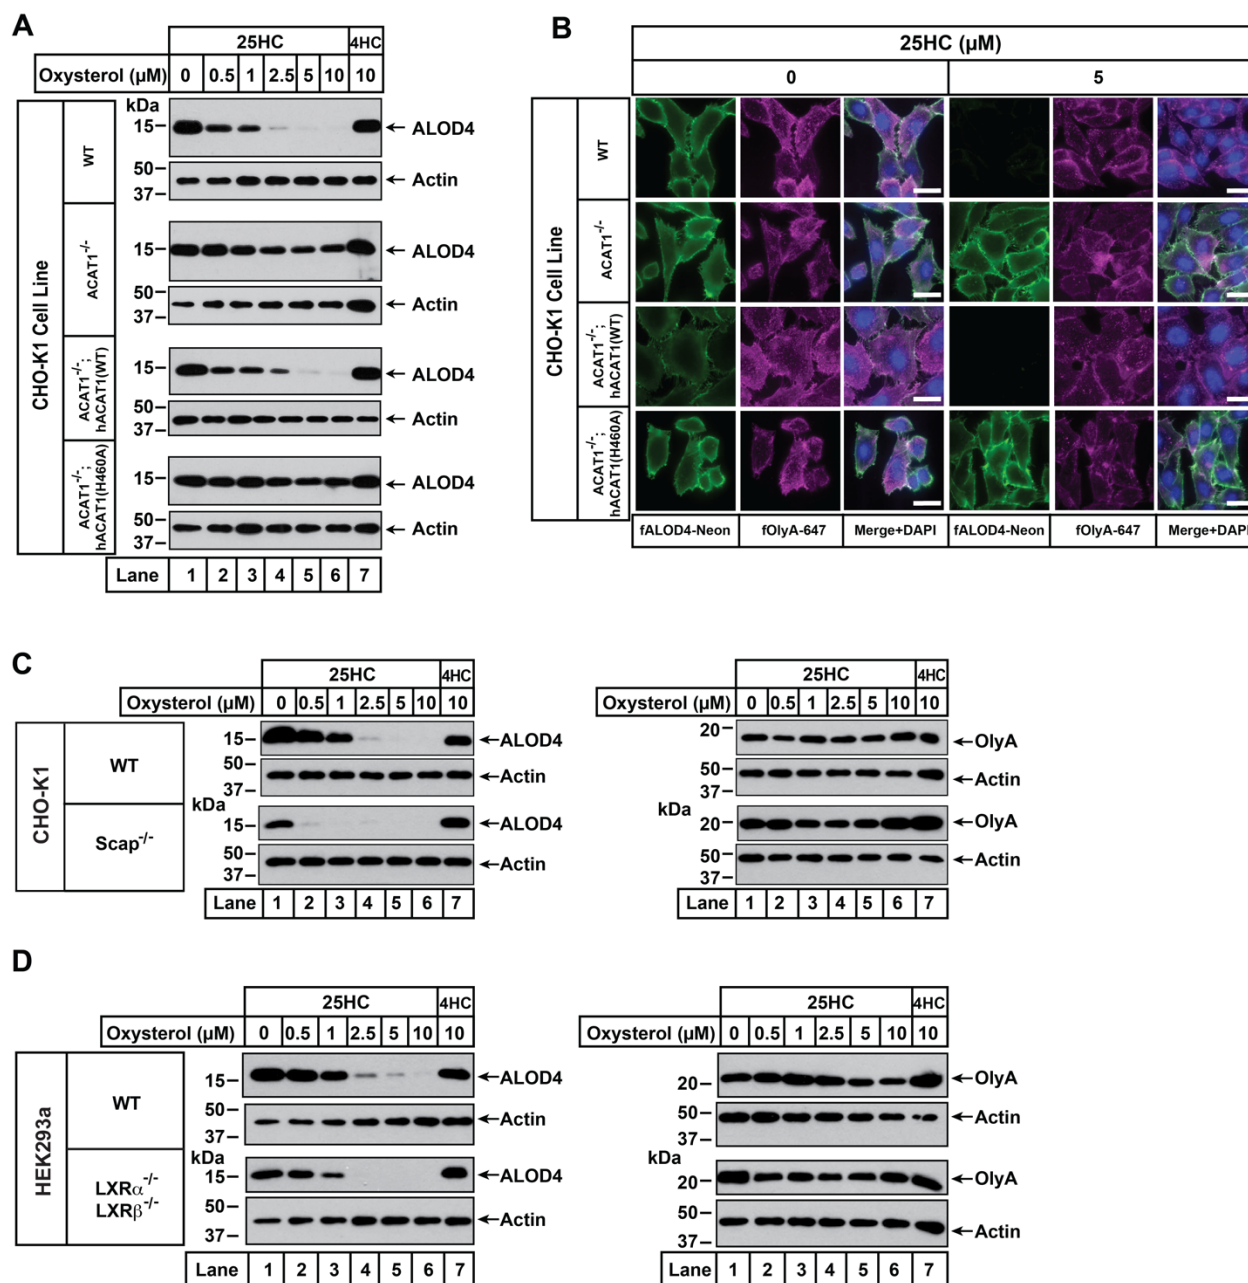

1265  
1266  
1267

1268 **Figure 2. 25HC fails to trigger rapid depletion of accessible cholesterol from PMs of ACAT-**  
1269 **deficient cells.**

1270 (A) Immunoblot analysis of ALOD4 binding. On day 0, the indicated versions of CHO-K1 cells  
1271 were set up in medium B at a density of  $6 \times 10^4$  cells per well of a 48-well plate. On day 1, media  
1272 was removed, cells were washed twice with 500  $\mu\text{l}$  of PBS followed by addition of 200  $\mu\text{l}$  of

1273 medium B supplemented with the indicated concentrations of either 25HC or 4HC. After  
1274 incubation at 37°C for 4 h, media was removed and replaced with 200 µl of medium B  
1275 supplemented with 3 µM His<sub>6</sub>-Flag-ALOD4. After incubation at 37°C for 30 min, cells were washed  
1276 twice with 500 µl of PBS, harvested, and equal aliquots of cell lysates were subjected to  
1277 immunoblot analysis as described in *Methods*.

1278 (B) Fluorescence microscopy analysis of ALOD4 and OlyA binding. On day 0, the indicated  
1279 versions of CHO-K1 cells were set up in medium B at a density of 3 x 10<sup>4</sup> cells per well of an 8-  
1280 well Lab-Tek II chambered #1.5 coverglass dish. On day 1, media was removed, cells were  
1281 washed twice with 500 µl of PBS followed by addition of 200 µl of medium B supplemented with  
1282 the indicated concentration of 25HC. After incubation at 37°C for 4 h, media was removed and  
1283 replaced with 200 µl of medium B supplemented with 3 µM of either fALOD4-Neon or fOlyA-647.  
1284 After incubation at 37°C for 30 min, media was removed, cells were washed twice with 500 µl of  
1285 PBS, fixed, stained with DAPI, and imaged as described in *Methods*. *Scale bar*, 25 µm.

1286 (C, D) Effects of 25HC on PM cholesterol pools in cells lacking Scap or LXR transcription factors.  
1287 On day 0, the indicated cell lines were set up in either medium B (C) or medium D (D) at a density  
1288 of 6 x 10<sup>4</sup> cells per well of a 48-well plate. On day 1, media was removed, cells were washed  
1289 twice with 500 µl of PBS followed by addition of 200 µl of media supplemented with the indicated  
1290 concentrations of either 25HC (*lanes 1-6*) or 4HC (*lane 7*). After incubation at 37°C for 4 h, media  
1291 was removed and replaced with 200 µl of media supplemented with 3 µM of either His<sub>6</sub>-Flag-  
1292 ALOD4 (*left panels*) or OlyA-His<sub>6</sub> (*right panels*). After incubation at 37°C for 30 min, cells were  
1293 washed twice with 500 µl of PBS, harvested, and equal aliquots of cell lysates were subjected to  
1294 immunoblot analysis as described in *Methods*.

1295

## Figure 3

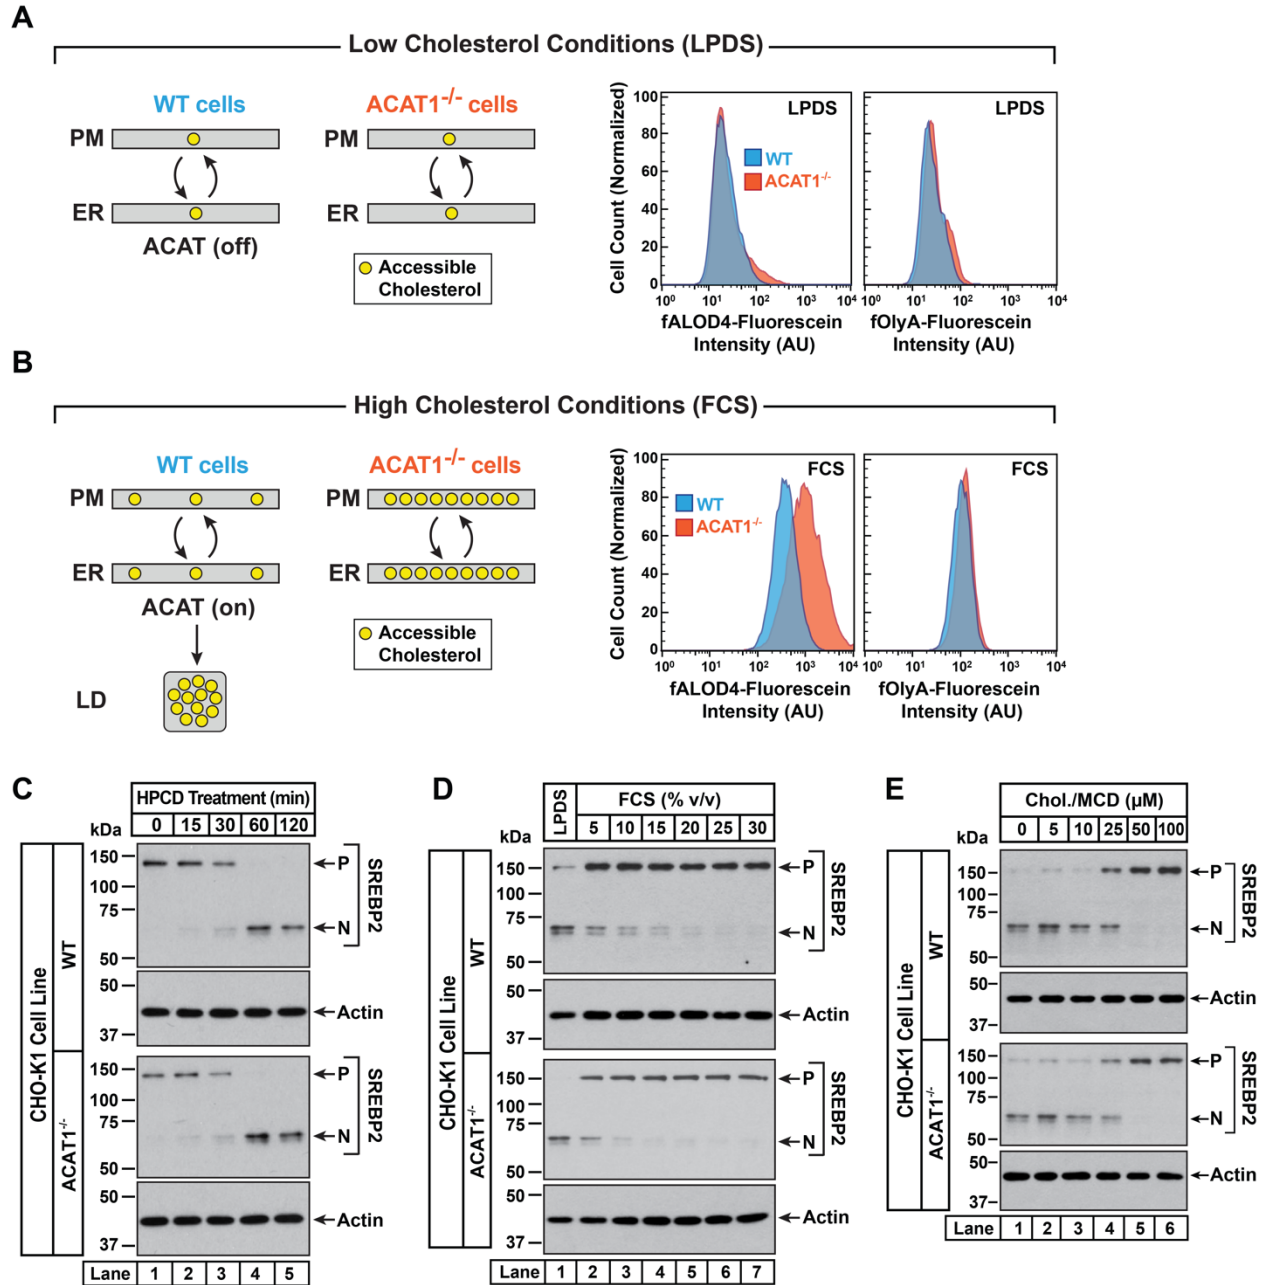

1296  
1297  
1298

1299 **Figure 3. Intracellular cholesterol trafficking and steady state levels of PM accessible**  
1300 **cholesterol in ACAT-deficient cells.**

1301 On day 0, wild-type and ACAT1-deficient CHO-K1 cells were set up in medium B at a density of  
1302  $5 \times 10^4$  cells per well of a 24-well plate (A – C) or  $6 \times 10^4$  cells per well of a 48-well plate (D, E).

1303 (A, B) Steady state levels of accessible cholesterol in PMs. On day 1, media was removed, cells  
1304 were washed twice with 500  $\mu$ l of PBS followed by addition of 500  $\mu$ l of medium A supplemented  
1305 with 5% (v/v) of either LPDS (A) or FCS (B). On day 2, media was removed, cells were washed  
1306 twice with 500  $\mu$ l of PBS followed by addition of 200  $\mu$ l of medium A containing 5% (v/v) of the  
1307 indicated serum along with 0.5  $\mu$ M of either fALOD4-fluorescein or fOlyA-fluorescein. After  
1308 incubation at 37°C for 30 min, media was removed, cells were washed twice with 500  $\mu$ l of PBS,  
1309 and subjected to flow cytometry as described in *Methods*.

1310 (C) Cholesterol depletion by HPCD. On day 1, media was removed, cells were washed twice with  
1311 500  $\mu$ l of PBS followed by addition of 200  $\mu$ l of medium B supplemented with 2% (w/v) HPCD.

1312 (D) Cholesterol repletion by lipoproteins. On day 1, media was removed, cells were washed twice  
1313 with 500  $\mu$ l of PBS followed by addition of 500  $\mu$ l of cholesterol-depleting medium C. On day 2,  
1314 media was removed, cells were washed twice with 500  $\mu$ l of PBS followed by addition of 200  $\mu$ l  
1315 of either medium A containing either 5% (v/v) lipoprotein-deficient serum (*lane 1*) or the indicated  
1316 concentrations of lipoprotein-rich FCS (*lanes 2 – 7*).

1317 (E) Cholesterol repletion by cholesterol/cyclodextrin complexes. On day 1, media was removed,  
1318 cells were washed twice with 500  $\mu$ l of PBS followed by addition of 200  $\mu$ l of medium C  
1319 supplemented with 1% (w/v) HPCD. After incubation at 37°C for 1 h, media was removed, cells  
1320 were washed twice with 500  $\mu$ l of PBS followed by addition of 200  $\mu$ l of medium C supplemented  
1321 with the indicated concentrations of cholesterol/MCD complexes.

1322 (C – E) After incubation at 37°C for the indicated times (C), 5 h (D), or 3 h (E), media was removed,  
1323 cells were washed twice with 500  $\mu$ l of PBS, harvested, and equal aliquots of cell lysates were  
1324 subjected to immunoblot analysis as described in *Methods*. *P*, precursor form of SREBP2; *N*,  
1325 cleaved nuclear form of SREBP2.

1326



## Figure 4

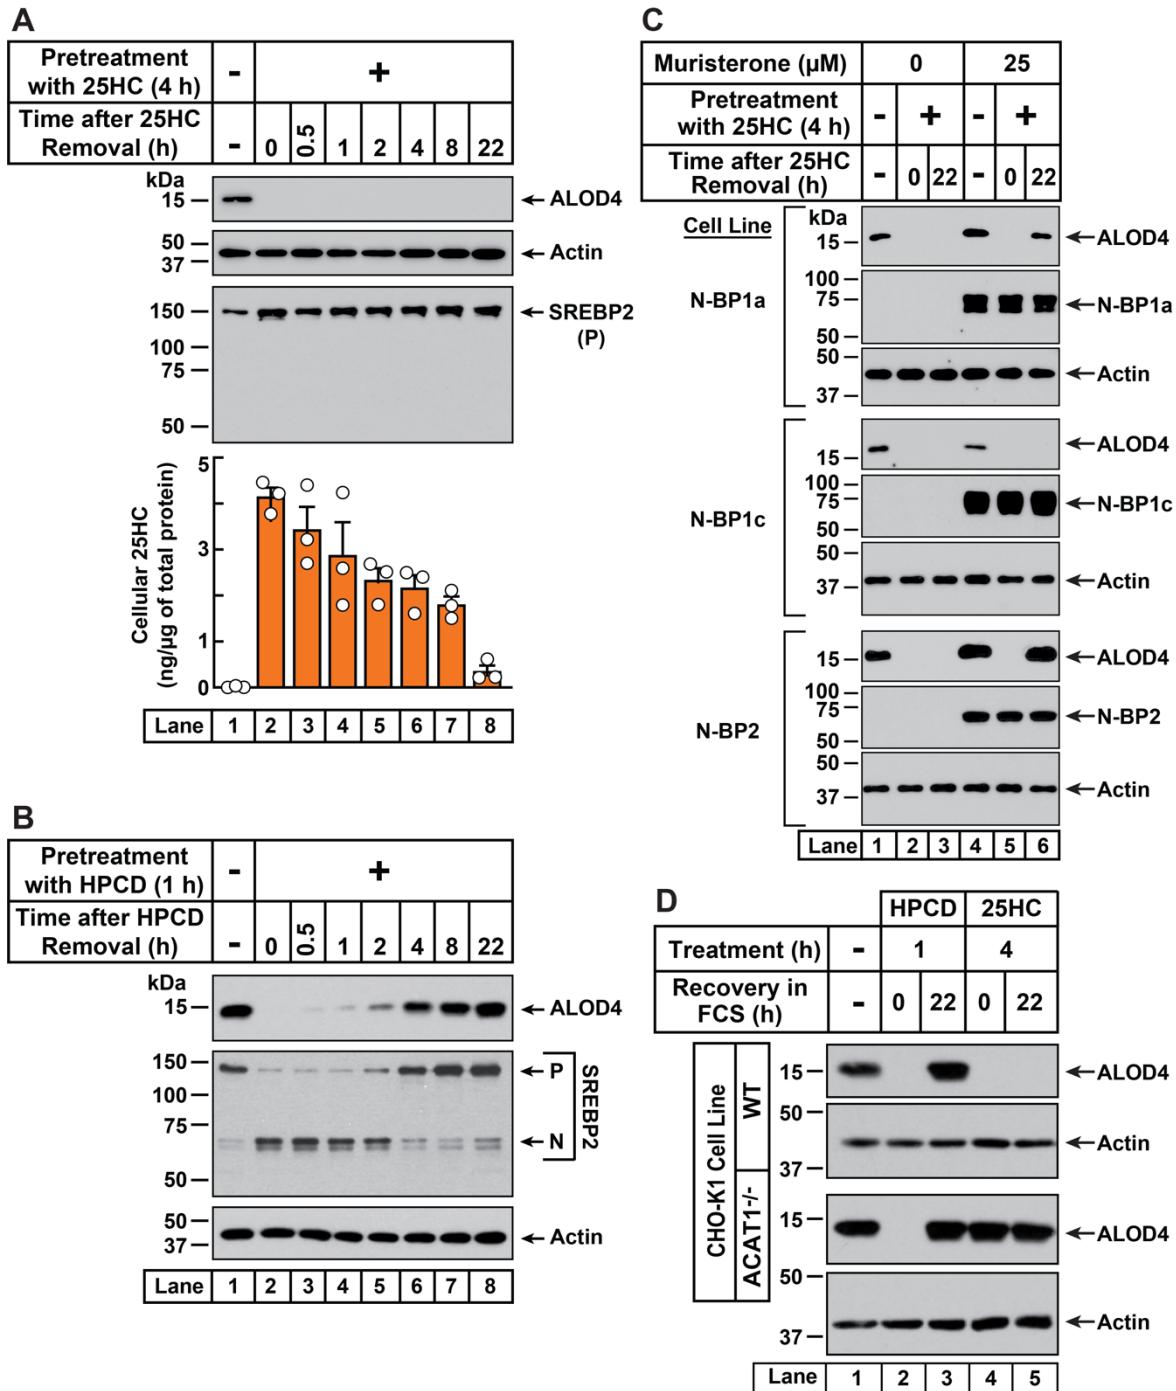

1327  
1328

1329 **Figure 4. 25HC-triggered depletion of accessible cholesterol from PMs persists for long**  
1330 **times through suppression of SREBP-mediated cholesterol synthesis and uptake**

1331 (A) Retention of 25HC in cells prevents replenishment of accessible cholesterol on PMs after it  
1332 has been depleted by 25HC. On day 0, CHO-K1 cells were set up in medium B in eight 24-well  
1333 plates at a density of  $1.5 \times 10^5$  cells per well. On day 1, media was removed from seven of the  
1334 eight plates, cells were washed twice with 1 ml of PBS followed by addition of 1 ml of medium B  
1335 supplemented with 5  $\mu$ M of 25HC (*lanes 2-8*). After incubation at 37°C for 4 h, media was  
1336 removed, cells were washed twice with 1 ml of PBS followed by addition of 1 ml of medium B.  
1337 Each of the seven plates was incubated for the indicated times, after which media was removed  
1338 from 10 wells and cells were washed twice with 1 ml of PBS. Then, 100  $\mu$ l of PBS was added to  
1339 each well and the cells were scraped and pooled for further analysis. The eighth plate (*lane 1*)  
1340 was not subjected to any treatment and was processed for analysis as above. For each plate, an  
1341 aliquot of the pooled cells (20% of total) was used to determine protein concentration with a BCA  
1342 protein assay kit and the remainder (80% of total) was subjected to mass spectrometry analysis  
1343 as described in *Methods*. An eleventh well from each plate was subjected to immunoblot analysis  
1344 of His<sub>6</sub>-Flag-ALOD4 binding (*top panel*). These samples were also immunoblotted for SREBP2  
1345 (*third panel*). P, precursor form of SREBP2; N, cleaved nuclear form of SREBP2.

1346 (B) Recovery of accessible cholesterol on PMs after depletion by HPCD. On day 0, CHO-K1 cells  
1347 were set up in medium B at a density of  $1.5 \times 10^5$  cells per well of a 24-well plate. On day 1,  
1348 media was removed, cells were washed twice with 1 ml of PBS followed by addition of 300  $\mu$ l of  
1349 medium B supplemented with 1% (w/v) HPCD (*lanes 2-8*). After incubation at 37°C for 1 h, media  
1350 was removed, cells were washed twice with 1 ml of PBS followed by addition of 1 ml of medium  
1351 B. After incubation for the indicated times, media was removed from these treated wells as well  
1352 as from a well that was not subjected to any of the above treatments (*lane 1*). The media was  
1353 replaced with 200  $\mu$ l of medium B supplemented with 3  $\mu$ M His<sub>6</sub>-Flag-ALOD4. After incubation at  
1354 37°C for 30 min, cells were washed twice with 1 ml of PBS, harvested, and equal aliquots of cell  
1355 lysates were subjected to immunoblot analysis as described in *Methods*.

1356 (C) Nuclear SREBPs counteract 25HC-mediated depletion of accessible cholesterol. On day 0,  
1357 Site-2 protease-deficient CHO-K1 cells inducibly expressing the nuclear transcription factor  
1358 domains (N-BP) of the indicated isoforms of SREBP were set up in medium B at a density of  $5 \times$   
1359  $10^4$  cells per well of a 48-well plate. On day 1, media was removed, cells were washed twice with  
1360 500  $\mu$ l of PBS followed by addition of 200  $\mu$ l of medium B supplemented with the indicated  
1361 concentrations of muristerone A. On day 2, media was removed, cells were washed twice with  
1362 500  $\mu$ l of PBS followed by addition of 200  $\mu$ l of medium B supplemented with the indicated

1363 concentration of muristerone along with 5  $\mu$ M 25HC (*lanes 2, 3, 5, 6*). After incubation at 37°C  
1364 for 4 h, media was removed, cells were washed twice with 500  $\mu$ l of PBS followed by addition of  
1365 200  $\mu$ l of medium B. After incubation for the indicated times, media was removed from these  
1366 25HC-treated wells as well as from two wells that were not subjected to any of the above  
1367 treatments (*lanes 1, 4*). The media was replaced with 200  $\mu$ l of medium B supplemented with 3  
1368  $\mu$ M His<sub>6</sub>-Flag-ALOD4. After incubation at 37°C for 30 min, cells were washed twice with 500  $\mu$ l  
1369 of PBS, harvested, and equal aliquots of cell lysates were subjected to immunoblot analysis as  
1370 described in *Methods*.

1371 (D) PM accessible cholesterol in ACAT-deficient cells. On day 0, the indicated versions of CHO-  
1372 K1 cells were set up in medium B at a density of  $1.5 \times 10^5$  cells per well of a 24-well plate. On  
1373 day 1, media was removed, cells were washed twice with 500  $\mu$ l of PBS followed by addition of  
1374 300  $\mu$ l of medium B supplemented with either 1% (w/v) HPCD (*lanes 2, 3*) or 5  $\mu$ M 25HC (*lanes*  
1375 *4, 5*). After incubation for either 1 h (*lanes 2, 3*) or 4 h (*lanes 4, 5*), media was removed, cells  
1376 were washed twice with PBS followed by addition of 1 ml of medium B. After incubation for the  
1377 indicated times, media was removed from these treated wells as well as from a well that was not  
1378 subjected to any of the above treatments (*lane 1*). The media was replaced with 200  $\mu$ l of medium  
1379 B supplemented with 3  $\mu$ M His<sub>6</sub>-Flag-ALOD4. After incubation at 37°C for 30 min, cells were  
1380 washed twice with 1 ml of PBS, harvested, and equal aliquots of cell lysates were subjected to  
1381 immunoblot analysis as described in *Methods*.

1382

## Figure 5

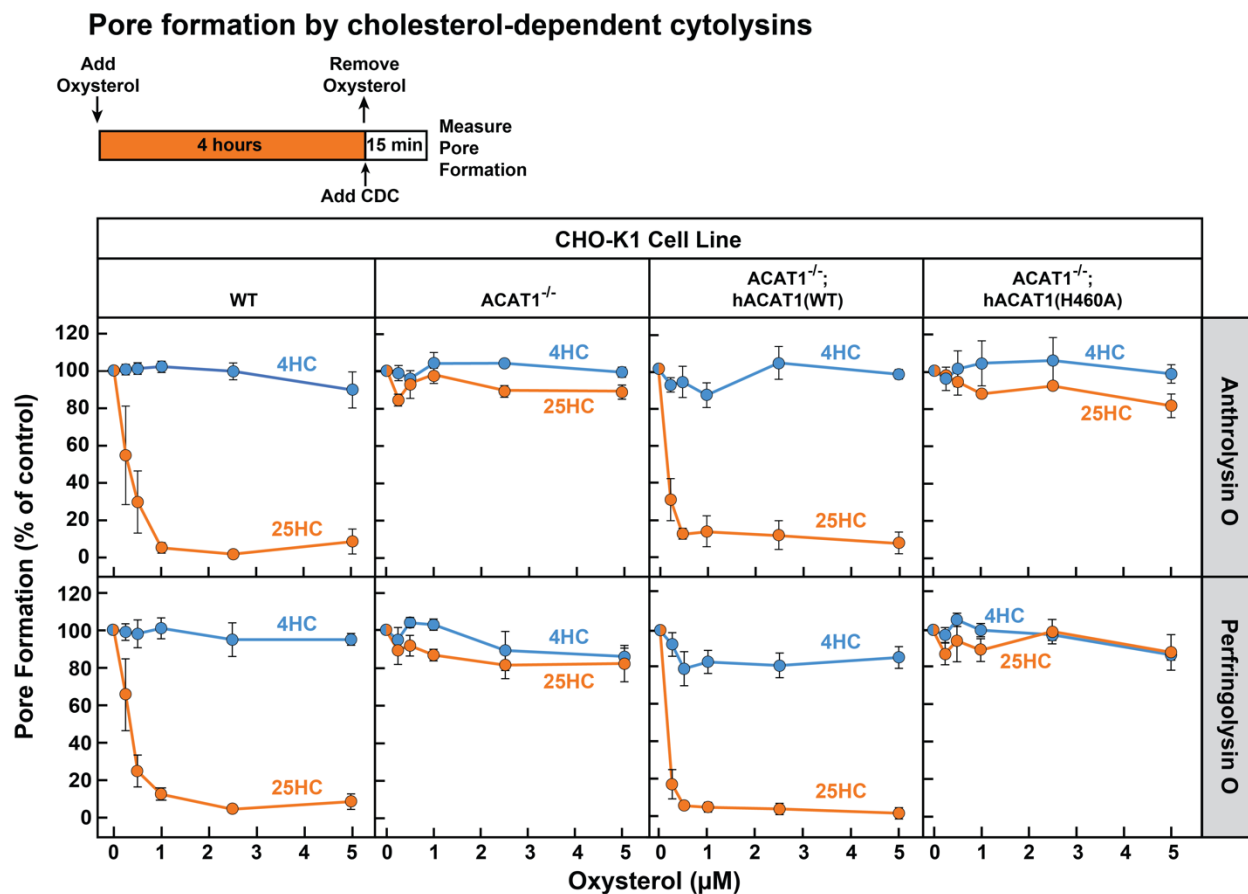

1383  
1384  
1385

1386 **Figure 5. 25HC fails to protect ACAT-deficient cells from pore formation by bacterial**  
1387 **cytolysins.**

1388 Pore formation by bacterial cytolysins. On day 0, the indicated versions of CHO-K1 cells were  
1389 set up in medium B at a density of  $7.5 \times 10^4$  cells per well of a 48-well plate. On day 1, media  
1390 was removed and replaced with 500  $\mu$ l of medium B supplemented with the indicated  
1391 concentrations of either 25HC or 4HC. After incubation at 37°C for 4 h, media was removed, cells  
1392 were washed twice with 500  $\mu$ l of HBSS followed by addition of 500  $\mu$ l of HBSS containing either  
1393 100 pM of His<sub>6</sub>-ALO(FL) (top panel) or 500 pM of His<sub>6</sub>-PFO(FL) (bottom panel). After incubation  
1394 at 37°C for 15 min, media was removed and pore formation was assessed as described in  
1395 *Methods*. For each cell line, the extent of pore formation in the absence of oxysterol treatment  
1396 was set to 100%, and all other values were normalized to this set-point.

1397

**Figure 6**

**A. Infection by *Listeria monocytogenes* - Cell Lines**

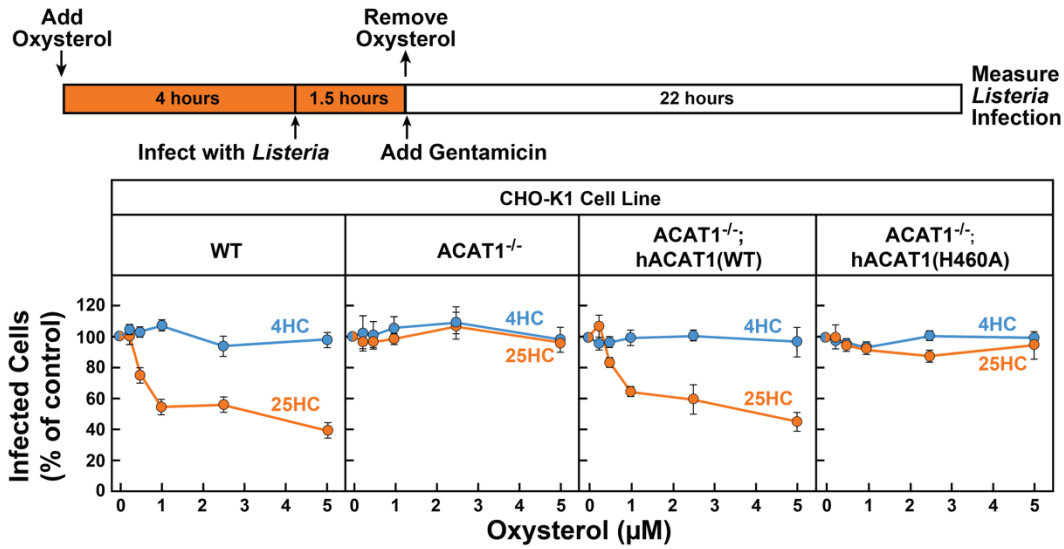

**B. Infection by *Listeria monocytogenes* - Mice**

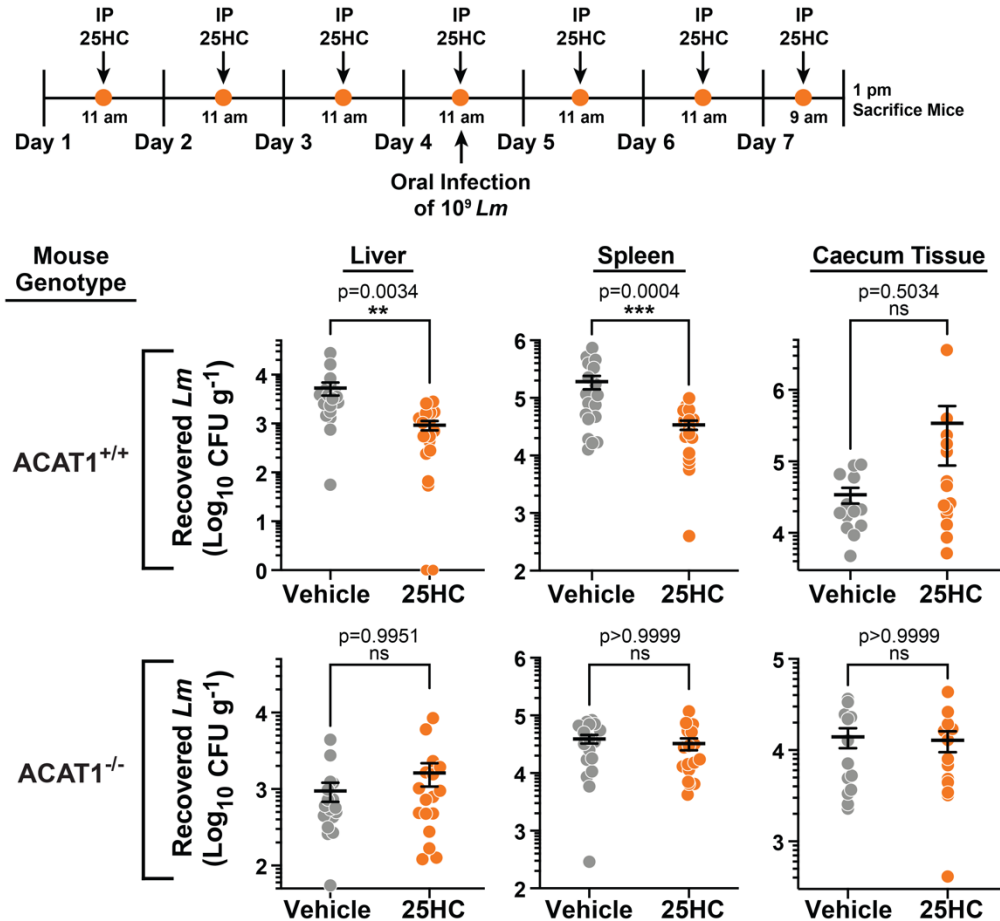

1399 **Figure 6. 25HC fails to protect ACAT-deficient cell lines and mice from infection by *Listeria***  
1400 ***monocytogenes***

1401 (A) *Listeria* infection of CHO-K1 cells. On day 0, the indicated versions of CHO-K1 cells were set  
1402 up in medium I at a density of  $1 \times 10^5$  cells per well of a 24-well plate. On day 1, media was  
1403 supplemented with either 25HC or 4HC to obtain the final concentration indicated. After  
1404 incubation at 37°C for 4 h, cells were infected with *Listeria monocytogenes* (MOI = 1) for 90 min.  
1405 Following this step, cells were washed twice with 1 ml of PBS followed by addition of 1 ml of  
1406 medium I supplemented with 50 µg/ml of gentamicin to kill extracellular bacteria. After 22 h, cells  
1407 were harvested and infection levels were determined as described in *Methods*. For each cell line,  
1408 the infection level measured in the absence of oxysterols was set to 100% for each replicate, and  
1409 all other values were normalized to this set-point.

1410 (B) *Listeria* infection of mice. On days 1 – 7, ACAT1<sup>+/+</sup> and ACAT1<sup>-/-</sup> mice were injected once  
1411 daily intraperitoneally with either 25HC or ethanol. On day 4, the mice were orally infected with  $1$   
1412  $\times 10^9$  *Listeria monocytogenes* strain EGD harboring a mutation in Internalin A (*Lm-InIA<sup>m</sup>*) as  
1413 described in the *Methods*. On day 7, 4 h after the 25HC injection, the spleen, liver, and caecum  
1414 tissues of each mouse was collected and infection levels were determined as described in  
1415 *Methods*. Asterisks denote levels of statistical significance (one-way analysis of variance  
1416 (ANOVA) with Dunnett's correction): non-significant (ns)  $p > 0.05$ ; \*  $p \leq 0.05$ ; \*\*  $p \leq 0.01$ ; and \*\*\*  
1417  $p \leq 0.001$ . *IP*, intraperitoneal injection.



## Figure 7

### A. Infection by ZIKV-mR766

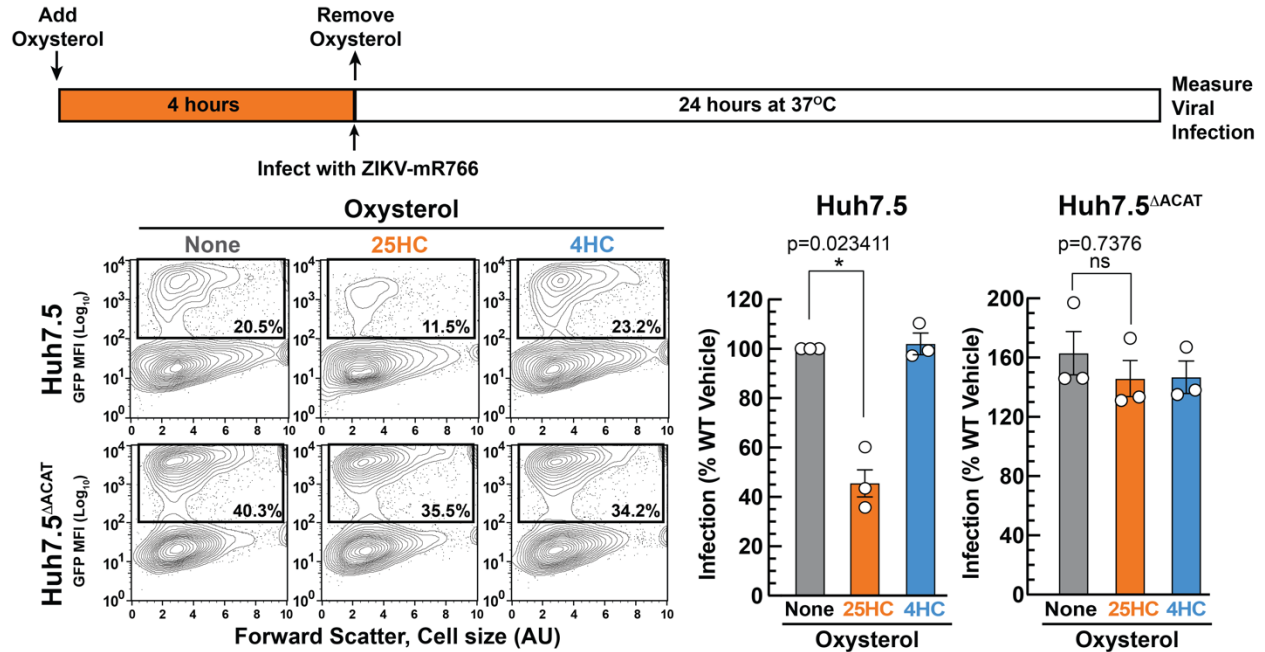

### B. Infection by hCoV-OC43

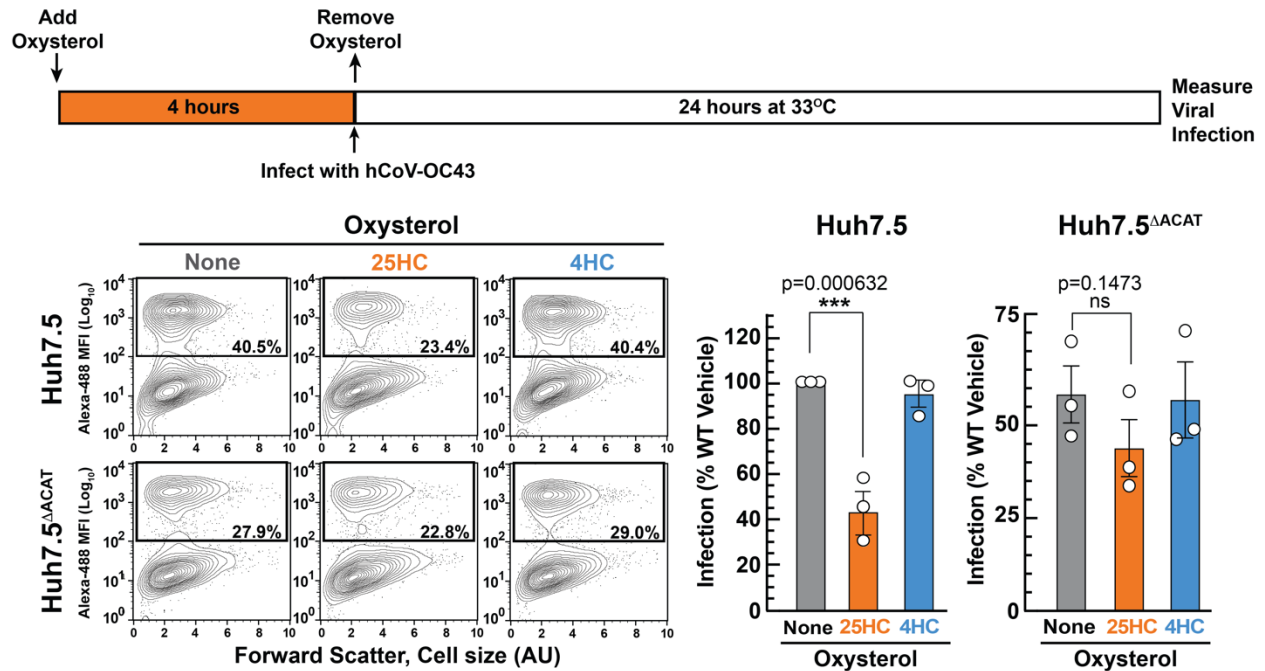

1418

1419

1420

**Figure 7. 25HC fails to protect ACAT-deficient cells from viral infection.**

1421

(A, B) Viral infection of Huh7.5 cells. On day 0, the indicated versions of Huh7.5 cells were set

1422 up in medium E at a density of  $7 \times 10^4$  cells per well of a 24-well plate. On day 1, media was  
1423 removed and replaced with 1 ml of medium E supplemented with 5  $\mu$ M of the indicated oxysterol.  
1424 After incubation at 37°C for 4 h, media was removed, and cells were infected with either hCoV-  
1425 OC43 (A) or ZIKV-mR766 (B) at the indicated temperatures as described in *Methods*. After 24 h,  
1426 cells were harvested, and infection levels were determined as described in *Material and Methods*.  
1427 Representative flow cytometry plots of infected cells and quantification of infection levels  
1428 (*rectangular boxes*) are shown for hCoV-OC43 (A) and ZIKV-mR766 (B). The infection value  
1429 obtained for Huh7.5 cells in the absence of oxysterol treatment for each experiment was set to  
1430 100% and all other values are normalized to this set-point. Asterisks denote levels of statistical  
1431 significance (one-way analysis of variance (ANOVA) with Dunnett's correction) of the  
1432 unnormalized data: non-significant (ns)  $p > 0.05$ ; \*  $p \leq 0.05$ ; \*\*  $p \leq 0.01$ ; and \*\*\*  $p \leq 0.001$ . In all panels,  
1433 no significant differences ( $p > 0.05$ ) were detected in cells treated with 4HC.  
1434

**Figure S1**

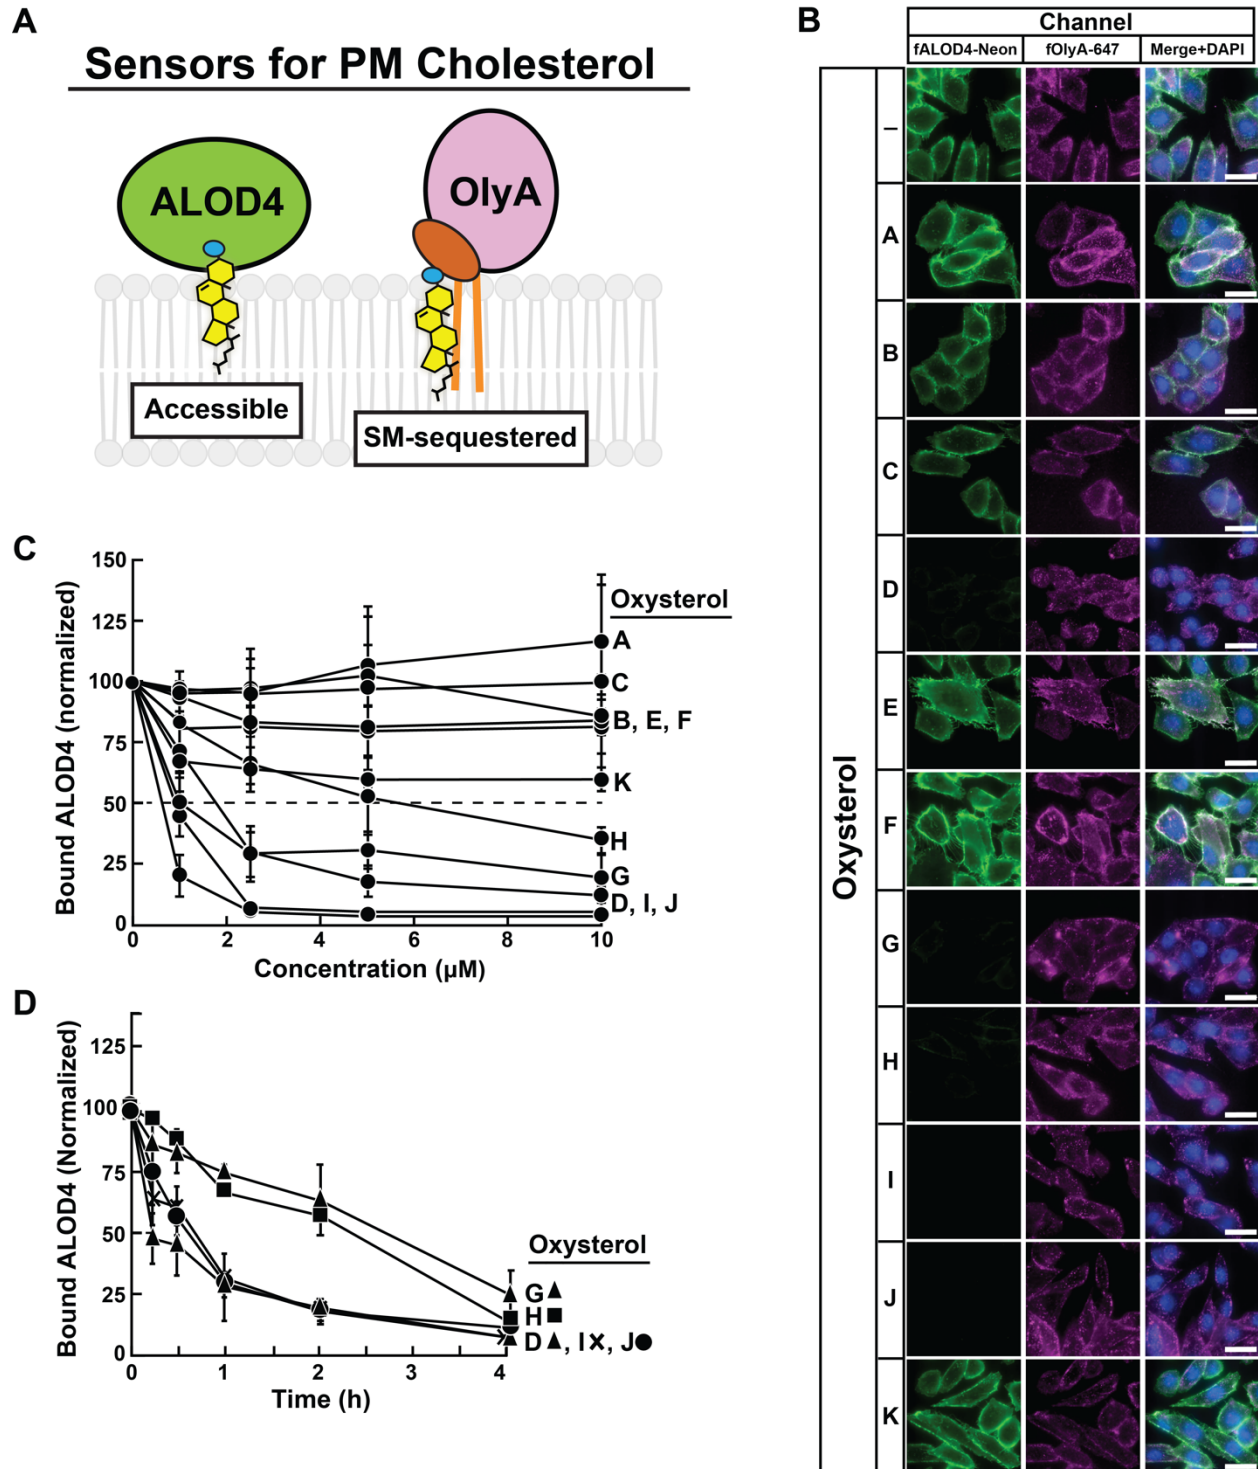

1435  
1436

1437 **Figure S1. Comparison of effects of oxysterols on PM cholesterol pools.**

1438 (A) Schematic of protein sensors used to monitor changes in PM cholesterol pools.

1439 (B) Fluorescence microscopy analysis of ALOD4 and OlyA binding. On day 0, CHO-K1 cells were  
1440 set up in medium B at a density of  $3 \times 10^4$  cells per well of an 8-well Lab-Tek II chambered #1.5  
1441 coverglass dish. On day 1, media was removed, cells were washed twice with 500  $\mu$ l of PBS  
1442 followed by addition of 200  $\mu$ l of medium B supplemented with 5  $\mu$ M of the indicated oxysterol.  
1443 After incubation at 37°C for 4 h, media was removed and replaced with 200  $\mu$ l of medium B  
1444 supplemented with 3  $\mu$ M fALOD4-Neon and 3  $\mu$ M fOlyA-647. After incubation at 37°C for 30 min,  
1445 media was removed, cells were washed twice with 500  $\mu$ l of PBS, fixed, stained with DAPI, and  
1446 imaged as described in *Methods*. *Scale bar*, 25  $\mu$ m.

1447 (C,D) Quantification of immunoblot analysis of ALOD4 binding. On day 0, CHO-K1 cells were set  
1448 up in medium B at a density of  $6 \times 10^4$  cells per well of a 48-well plate. On day 1, media was  
1449 removed, cells were washed twice with 500  $\mu$ l of PBS followed by addition of 200  $\mu$ l of medium B  
1450 supplemented with either varying concentrations (C) or 5  $\mu$ M (D) of the indicated oxysterol. After  
1451 incubation at 37°C for either 4 h (C) or for the indicated times (D), media was removed and  
1452 replaced with 200  $\mu$ l of medium B supplemented with 3  $\mu$ M His<sub>6</sub>-Flag-ALOD4. After incubation at  
1453 37°C for 30 min, cells were washed twice with 500  $\mu$ l of PBS and harvested, after which equal  
1454 aliquots of cell lysates were subjected to immunoblot analysis as described in *Methods*. The  
1455 immunoblot signals for bound ALOD4 and cellular actin after treatment with various oxysterols,  
1456 examples of which are shown in Figure 1A and 1B for oxysterol I, were then quantified as  
1457 described in *Methods*. Data points represent the mean of 3-6 experiments and error bars show  
1458 the standard error.

1459

## Figure S2

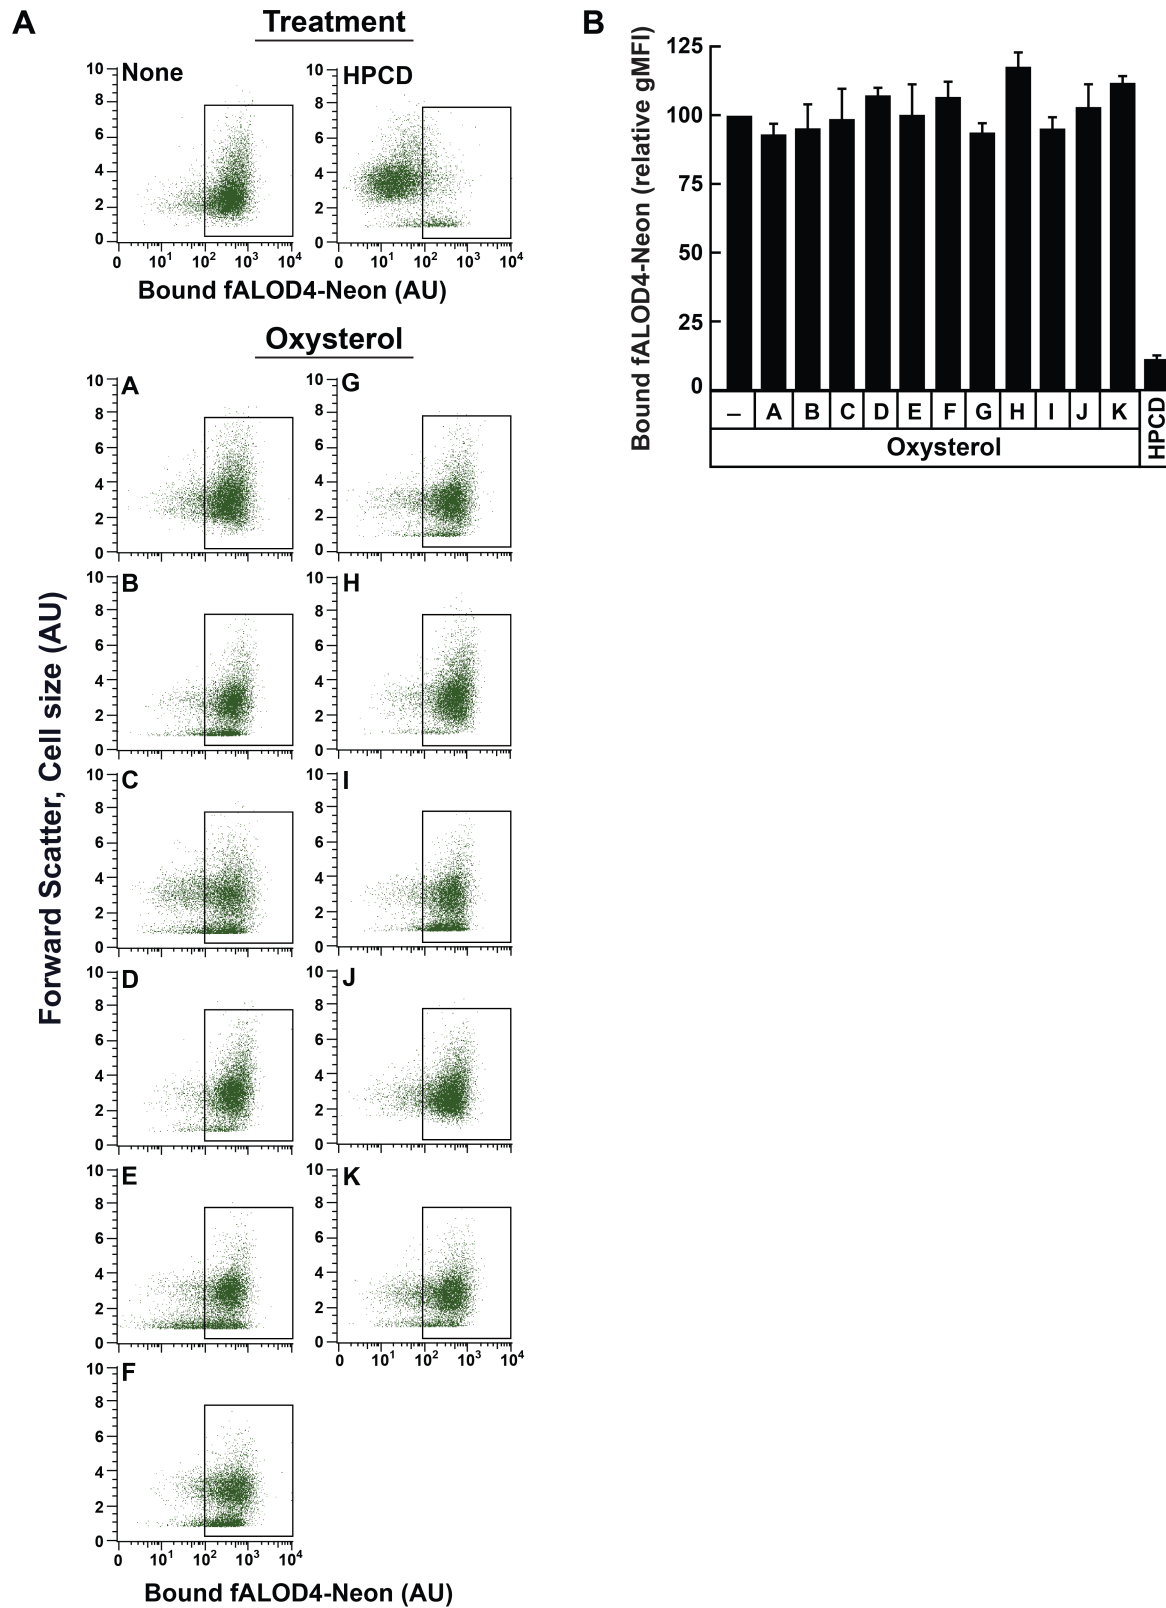

1461 **Figure S2. Treatment of red blood cells with oxysterols does not affect levels of accessible**  
1462 **cholesterol in their membranes.**

1463 (A, B) Each binding assay contained 500  $\mu$ l of rabbit red blood cells (RBCs) that had been washed  
1464 and diluted as described in Methods. RBCs were then subjected to one of the following  
1465 treatments at room temperature (RT): i) incubation for 4 h without or with 5  $\mu$ M of the indicated  
1466 oxysterol solubilized either in ethanol (A – J) or DMSO (K); or ii) incubation for 1 h with 1% (w/v)  
1467 HPCD (in buffer F). After the indicated treatments, RBCs were incubated with 1  $\mu$ M of fALOD4-  
1468 Neon for 30 min at RT, following which FACS analysis was carried out as described in Methods.  
1469 Representative flow cytometry analysis of fALOD4-Neon binding to 10,000 RBCs are shown in  
1470 (A) and the rectangular boxes represent fALOD4-Neon-bound RBCs. The geometric mean  
1471 fluorescence intensity (gMFI) of Neon fluorescence from three independent experiments are  
1472 shown in (B). Each column in (B) represents the mean of 3 independent experiments and error  
1473 bars indicate the standard error. The mean gMFI value obtained for binding of fALOD4-Neon to  
1474 RBCs in the absence of oxysterol treatment for each experiment (top left panel in A) was set to  
1475 100 and all other values were normalized to this set-point.

1476



## Figure S3

### A

#### Exon 2 of CHO-K1 ACAT1

Wild type sequence

5' - cctagGCAGCTTGGTGGGAGAGAAAAGATGTCCTAAGGAACCGGCTGTCAAAATCTGGTAAAAATCCTGAGCAAGATGAAGCCCAGAGAAGTGTCTCAGATACACAGAGCAATGgtgag  
 3' - gaatcAAAAAGAGCTTCCAAAGTTTACAGTGTTCCTGGCGGACAGTTTAGACCCTTTAGGACTCGTTCCTTCACAGAGTCTATGTGTCTCGTTACcactc  
 AA:1 M V G E E K M S L R N R L S K S G E N P E Q D E A Q R S V S D T Q S N

No disruption detected

#### Exon 14 of CHO-K1 ACAT1

Wild type sequence

5' - cttagTTTTCTCGAAGAGGTTCAAATCTGCCGCCATGTTGGCTGTCTTCGCCCTGTGCAGCTGTAGTGCATGAATACGCCCTCGCTGTCTTGAGCTATTCTACCCAGTGTCTTTGTACT  
 3' - gaatcAAAAAGAGCTTCCAAAGTTTACAGTGTTCCTGGCGGACAGTTTAGACCCTTTAGGACTCGTTCCTTCACAGAGTCTATGTGTCTCGTTACcactc  
 AA:435 F F S K R F K S A A M L A V F A L S A V V H E Y A L A V C L S Y F Y P V L F V

Disrupted sequence (4 bp deletion)

5' - cttagTTTTCTCGAAGAGGTTCAAATCTGCCGCCATGTTGGCTGTCTTCGCCCTGTGCAGCTGTAGTGCATGAATACGCCCTGTCTTGAGCTATTCTACCCAGTGTCTTTGTACTCTTC  
 3' - gaatcAAAAAGAGCTTCCAAAGTTTACAGTGTTCCTGGCGGACAGTTTAGACCCTTTAGGACTCGTTCCTTCACAGAGTCTATGTGTCTCGTTACcactc  
 AA:435 F F S K R F K S A A M L A V F A L S A V V H E Y A L S A \*

### B

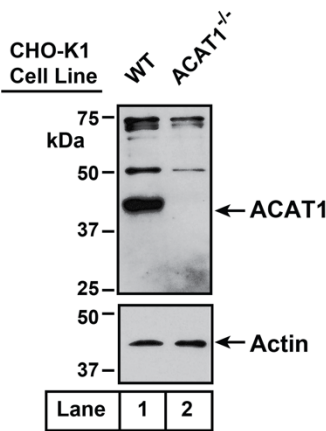

### C

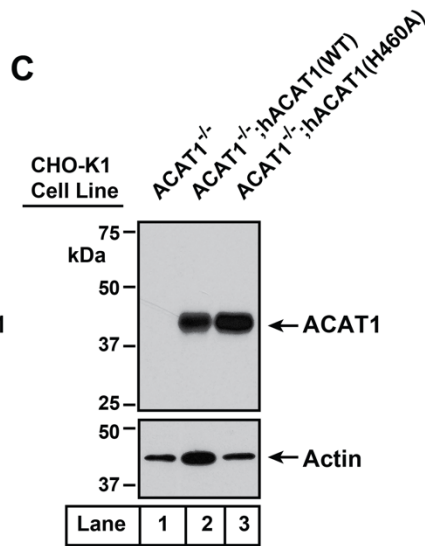

### D

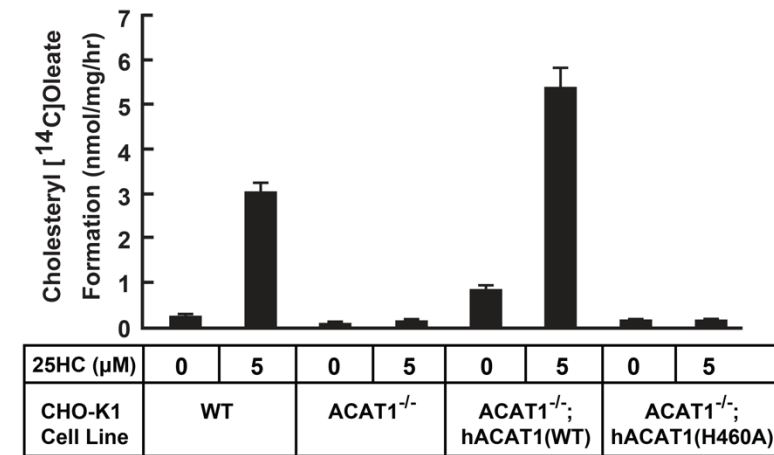

1477  
1478

1479 **Figure S3. Characterization of a CHO-K1 cell line deficient in ACAT1.**

1480 (A) Strategy for generating ACAT1-deficient CHO-K1 cells using CRISPR-Cas9 technology. Two  
1481 guide RNAs were designed to target and disrupt exons 2 and 14 of hamster ACAT1 (also  
1482 designated as SOAT1). The 20-nucleotide target sequence is shown in green and the NGG PAM  
1483 sequence is in purple. Genomic sequencing revealed no disruptions to exon 2 and a 4-bp deletion  
1484 in exon 14 (*red box*) that resulted in a truncated transcript encoding amino acids 1 – 461 of ACAT1  
1485 followed by two residues (*red*) and a stop codon (\*).

1486 (B, C) Immunoblot analysis. On day 0, the indicated versions of CHO-K1 cells were set up in  
1487 medium B at a density of  $6 \times 10^4$  cells per well of a 48-well plate. On day 1, media was removed,  
1488 cells were washed twice with 500  $\mu$ l of PBS, harvested, and equal aliquots of cell lysates were  
1489 subjected to immunoblot analysis as described in *Methods*.

1490 (D) ACAT activity. On day 0, the indicated versions of CHO-K1 cells were set up in medium B  
1491 at a density of  $2.5 \times 10^5$  cells per 60-mm dish. On day 2, media was removed, cells were  
1492 washed twice with 1 ml of PBS followed by addition of 2 ml of cholesterol-depleting medium C.  
1493 On day 3, media was removed, cells were washed with 1 ml of PBS followed by addition of 1 ml  
1494 of medium C supplemented with the indicated concentration of 25HC. After incubation at 37°C  
1495 for 1 h, each dish was supplemented with 0.2 mM sodium [ $^{14}$ C]oleate (6500 dpm/nmol) and  
1496 incubated at 37°C for an additional 2 h, after which cells were harvested, and levels of  
1497 cholesteryl [ $^{14}$ C]oleate were measured as described in *Methods*. Each column represents the  
1498 mean of cholesterol esterification measurements from three experiments, and error bars show  
1499 the standard error.

## Figure S4

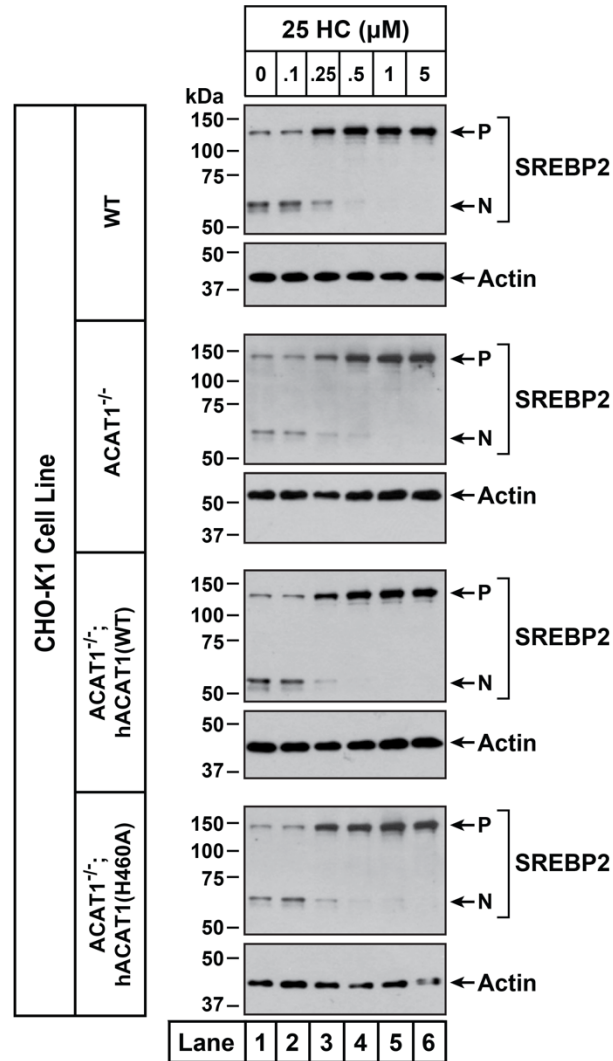

1500  
1501  
1502

### Figure S4. Effects of 25HC on SREBP2 processing in ACAT-deficient cells.

1503 On day 0, the indicated versions of CHO-K1 cells were set up in medium B at a density of  $6 \times 10^4$   
1504 cells per well of a 48-well plate. On day 1, media was removed, cells were washed twice with  
1505 500 μl of PBS followed by addition of 200 μl of medium C supplemented with 1% (w/v) HPCD.  
1506 After incubation at 37°C for 1 h, media was removed, cells were washed twice with 500 μl of PBS  
1507 followed by addition of 200 μl of medium C supplemented with the indicated concentrations of  
1508 25HC. After incubation at 37°C for 3 h, media was removed, cells were washed twice with 500  
1509 μl of PBS, harvested, and equal aliquots of cell lysates were subjected to immunoblot analysis as  
1510 described in *Methods*. *P*, precursor form of SREBP2; *N*, cleaved nuclear form of SREBP2.

## Figure S5

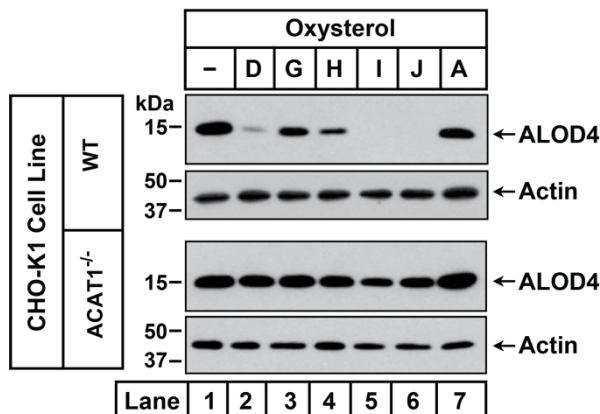

1511  
1512  
1513

1514 **Figure S5. Oxysterols that activate ACAT fail to trigger rapid depletion of accessible**  
1515 **cholesterol from PMs of ACAT-deficient cells.**

1516 On day 0, the indicated versions of CHO-K1 cells were set up in medium B at a density of  $6 \times 10^4$   
1517 cells per well of a 48-well plate. On day 1, media was removed, followed by addition of 200  $\mu$ l of  
1518 medium B supplemented without or with 5  $\mu$ M of the indicated oxysterols (see **Figure 1C** for  
1519 oxysterol structures). After incubation at 37°C for 4 h, media was removed and replaced with 200  
1520  $\mu$ l of medium B supplemented with 3  $\mu$ M His<sub>6</sub>-Flag-ALOD4. After incubation at 37°C for 30 min,  
1521 cells were washed twice with 500  $\mu$ l of PBS, harvested, and equal aliquots of cell lysates were  
1522 subjected to immunoblot analysis as described in *Methods*.

1523

## Figure S6

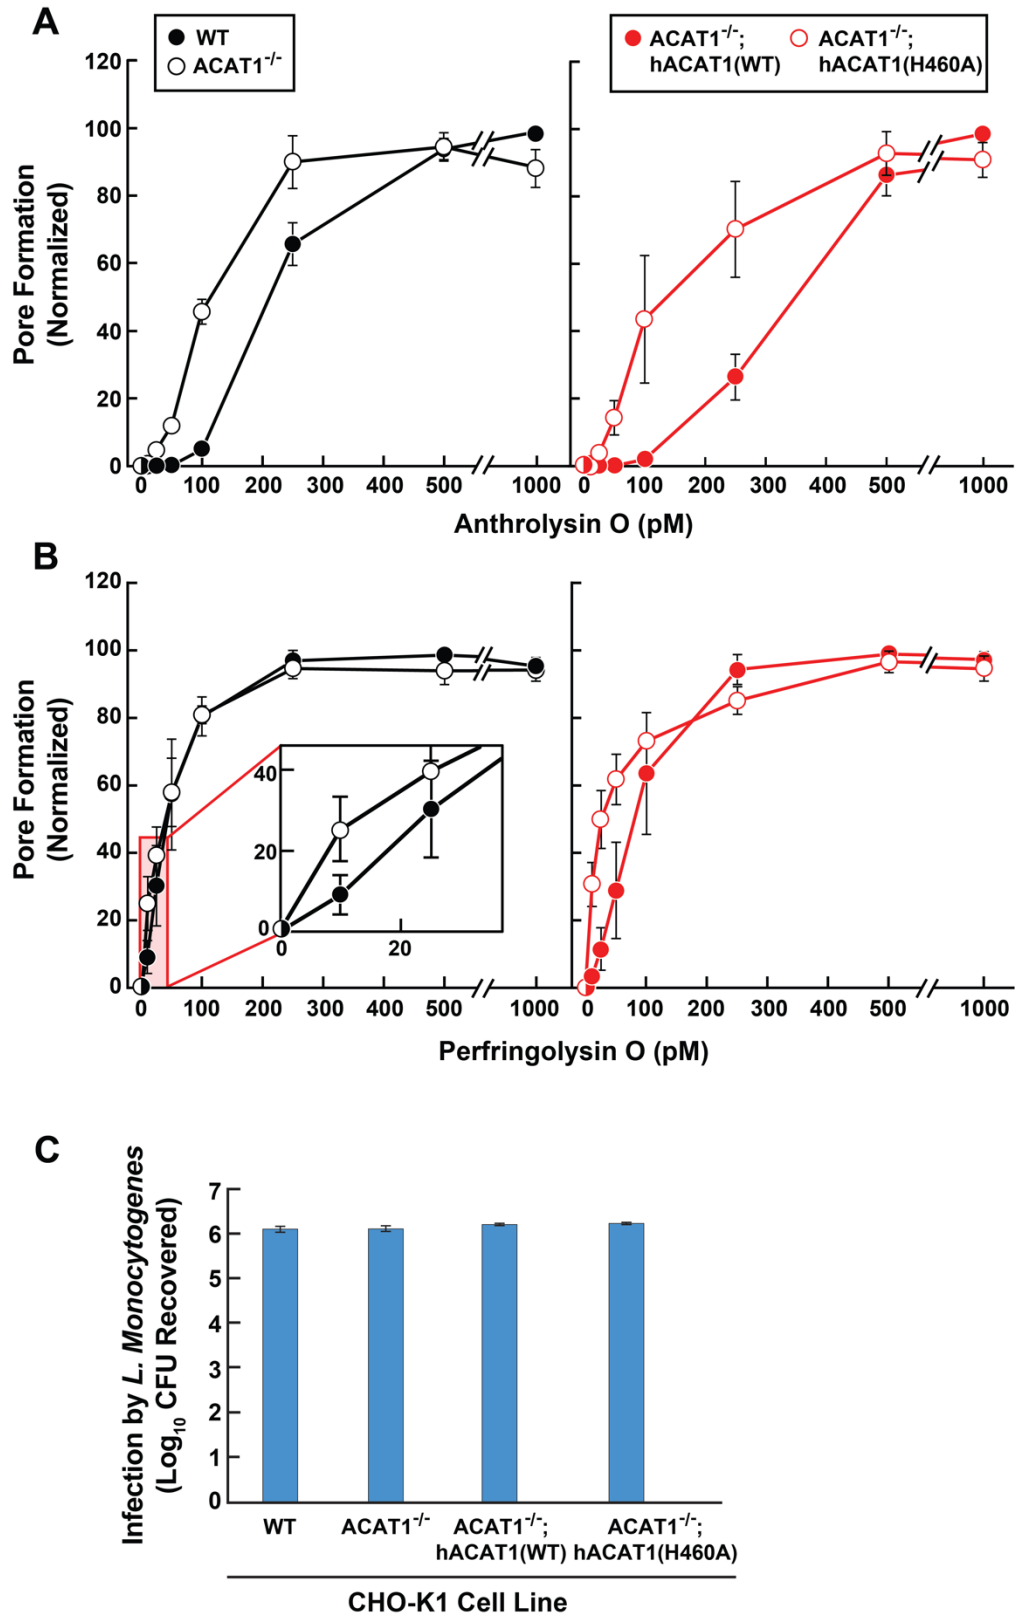

1525 **Figure S6. Susceptibility of wild-type and ACAT-deficient CHO-K1 cells to pore formation**  
1526 **by bacterial cytolysins and infection by *Listeria monocytogenes*.**

1527 (A, B) Pore formation by ALO and PFO. On day 0, the indicated versions of CHO-K1 cells were  
1528 set up in medium B at a density of  $7.5 \times 10^4$  cells per well of a 48-well plate. On day 1, media was  
1529 removed, cells were washed twice with 500  $\mu$ l of HBSS, followed by addition of 500  $\mu$ l of HBSS  
1530 supplemented with the indicated concentrations of His<sub>6</sub>-ALO(FL) (A) or His<sub>6</sub>-PFO(FL) (B). After  
1531 incubation for 15 min at 37°C, media was removed, and pore formation was assessed as  
1532 described in *Methods*. For each cell line, the maximum extent of pore formation for each replicate  
1533 assay was set to 100%, and all other values were normalized to this set-point.

1534 (C) Infection by *Listeria monocytogenes*. On day 0, the indicated versions of CHO-K1 cells were  
1535 set up in medium I at a density of  $1 \times 10^5$  cells per well of a 24-well plate. On day 1, cells were  
1536 infected with *Listeria monocytogenes* (MOI = 1) for 90 min. Following this step, cells were washed  
1537 twice with 1 ml of PBS followed by addition of 1 ml of medium I supplemented with 50  $\mu$ g/ml of  
1538 gentamicin. After 22 h, cells were harvested, and infection levels were determined as described  
1539 in *Methods*.

1540



## Figure S7

**A**

### Exon 6 of Huh7.5 ACAT1

Wild type sequence

5' - gtaccttttctccccagGCTGGTGGCTTGGAGTTGAGCTCAGCCTCCTGTCTTATGCTTTTGGCAAATTCCTACCGTTGTTGGACCTGGTGGATCATGTTCTGTCTACATTT...CAGgtaaggtt  
 3' - catgaaaaagaggggtgCGACCACGAAACACAAGTCGGAGGACAGAATACGAAAACCGTTTAAAGGATGGCAAGAAACCTGGACCACCTAGTACAAGGACAGATGTAAA...GTCcattccaaa  
 AA: 176 L V L E F S L L S Y A F G K F P T V V W T W W I M F L S T F Q 260

Disrupted sequence #1 (1 bp insertion)

5' - gtaccttttctccccagGCTGGTGGCTTGGAGTTGAGCTCAGCCTCCTGTCTTATGCTTTTGGCAAATTCCTACCGTTGTTGGACCTGGTGGATCATGTTCTGTCTACATTT...CAGgtaaggtt  
 3' - catgaaaaagaggggtgCGACCACGAAACACAAGTCGGAGGACAGAATACGAAAACCGTTTAAAGGATGGCCAAAGAAACCTGGACCACCTAGTACAAGGACAGATGTAAA...GTCcattccaaa  
 AA: 176 L V L E F S L L S Y A F G K F P T G C L D L V D H V P V Y I FSSLFSVSTLGHWL\*

Disrupted sequence #2 (63 bp deletion)

5' - gtaccttGTTGTTTGGACCTGGTGGATCATGTTCTGTCTACATTTTCAGTTCCTCATTTTCTGTTTCAACATTGGGCCACTGGCTATAGCAAGAGTTCTCATCCGCTGA  
 3' - catgaaaCAACAACCTGGACCACCTAGTACAAGGACAGATGTAAAAGTCAAGGGATAAAGACAAAGTTGTAACCCGGTGACCGATATCGTTCTCAAGAGTAGGCCACT  
 AA: 176 L F G P G G S C S C L H F Q F P I F C F N I G P L A I A R V L I R \*

### Exon 2 of Huh7.5 ACAT2

Wild type sequence

5' - cagGAAACACTGAGACGCACAGAGCCCCGGACTTGGTACAATGGACCCGACACATGGAGgtg  
 3' - gtcCTTTGTGACTCTGCGTGTACGGGGCTCAACCATGTTACCTGGGCTGTGTACCTCcac  
 AA: 29 N T E T H R A P D L V Q W T R H M E

Disrupted sequence #1 (7 bp deletion)

5' - cagGAAACACTGAGACGCACAGAGCCCCGGACAAATGGACCCGACACATGGAG  
 3' - gtcCTTTGTGACTCTGCGTGTACGGGGCTCTTACCTGGGCTGTGTACCTC  
 AA: 29 N T E T H R A P D N G P D T W R L\*

Disrupted sequence #2 (1 bp insertion)

5' - cagGAAACACTGAGACGCACAGAGCCCCGGAACCTGGTACAATGGACCCGACACATGGA  
 3' - gtcCTTTGTGACTCTGCGTGTACGGGGCTTCAACCATGTTACCTGGGCTGTGTACCT  
 AA: 29 N T E T H R A P E L G T M D P T H G GCEGTIAGASAGTTEGAAGSGHAGGYTILPITRQTSAPTSRPFLEQDPGAIPGETESFHPQVPA\*

**B**

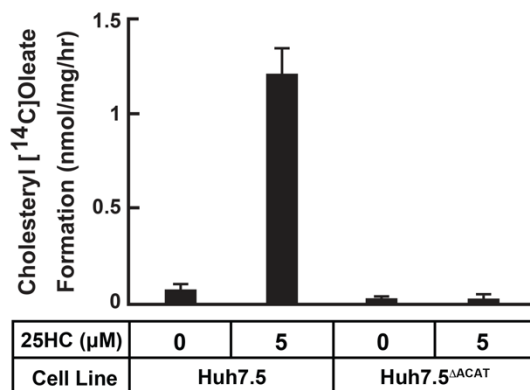

**C**

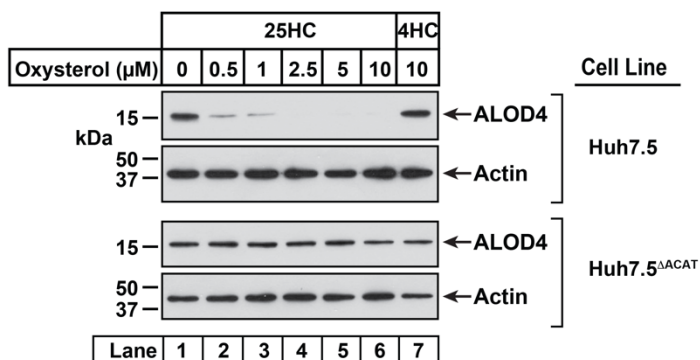

1541  
1542

1543 **Figure S7. Characterization of a Huh7.5 cell line deficient in ACAT1 and ACAT2.**

1544 (A) Strategy for generating Huh7.5 cells deficient in ACAT1 and ACAT2. Guide RNAs were  
1545 designed to target and disrupt exon 6 in human ACAT1 (also designated as SOAT1) and exon 2  
1546 in human ACAT2 (also designated as SOAT2). The 20-nucleotide target sequences are shown  
1547 in green and the NGG PAM sequences are in purple. Genomic sequencing of the ACAT1 gene  
1548 revealed a 1-bp insertion in one allele and a 63-bp deletion in the other allele that generated  
1549 premature stop codons and truncated transcripts as indicated in red. Genomic sequencing of the  
1550 ACAT2 gene revealed a 7-bp deletion in one allele and a 1-bp insertion in the other allele that  
1551 generated premature stop codons and truncated transcripts as indicated in red.

1552 (B) ACAT activity. On day 0, the indicated versions of Huh7.5 cells were set up in medium D at  
1553 a density of  $2.5 \times 10^5$  cells per 60-mm dish. On day 2, media was removed, cells were washed  
1554 twice with 1 ml of PBS followed by addition of 2 ml of cholesterol-depleting medium (DMEM (high  
1555 glucose) supplemented with 5% (v/v) LPDS, 50  $\mu$ M compactin, 50  $\mu$ M sodium mevalonate, 100  
1556 units/ml penicillin, and 100  $\mu$ g/ml streptomycin sulfate). On day 3, media was removed, cells were  
1557 washed with 1 ml of PBS followed by addition of 1 ml of the above cholesterol-depleting medium  
1558 supplemented with the indicated concentration of 25HC. After incubation at 37°C for 1 h, each  
1559 dish was supplemented with 0.2 mM sodium [ $^{14}$ C]oleate (6500 dpm/nmol) and incubated at 37°C  
1560 for an additional 2 h, after which cells were harvested, and levels of cholesteryl [ $^{14}$ C]oleate were  
1561 measured as described in *Methods*. Each column represents the mean of cholesterol  
1562 esterification measurements from three experiments, and error bars show the standard error.

1563 (C) Immunoblot analysis of ALOD4 binding. On day 0, the indicated versions of Huh7.5 cells  
1564 were set up in medium D at a density of  $1.5 \times 10^5$  cells per well of a 24-well plate. On day 1, media  
1565 was removed, cells were washed twice with 500  $\mu$ l of PBS followed by addition of 200  $\mu$ l of  
1566 medium D supplemented with the indicated concentrations of either 25HC or 4HC. After  
1567 incubation at 37°C for 4 h, media was removed and replaced with 200  $\mu$ l of medium D  
1568 supplemented with 3  $\mu$ M of His<sub>6</sub>-Flag-ALOD4. After incubation at 37°C for 30 min, cells were  
1569 washed twice with 500  $\mu$ l of PBS, harvested, and equal aliquots of cell lysates were subjected to  
1570 immunoblot analysis as described in *Methods*.
